# Supplementary material for: Fixation of allelic gene expression landscapes and expression bias pattern shape the transcriptome of the clonal Amazon molly
Source: HighWire-hosted journal article supplement (doi:10.1101/gr.268870.120), 2021-02-05
Supplement: Supplemental_Fig_S1.pdf [file Supplemental_Fig_S1.pdf]

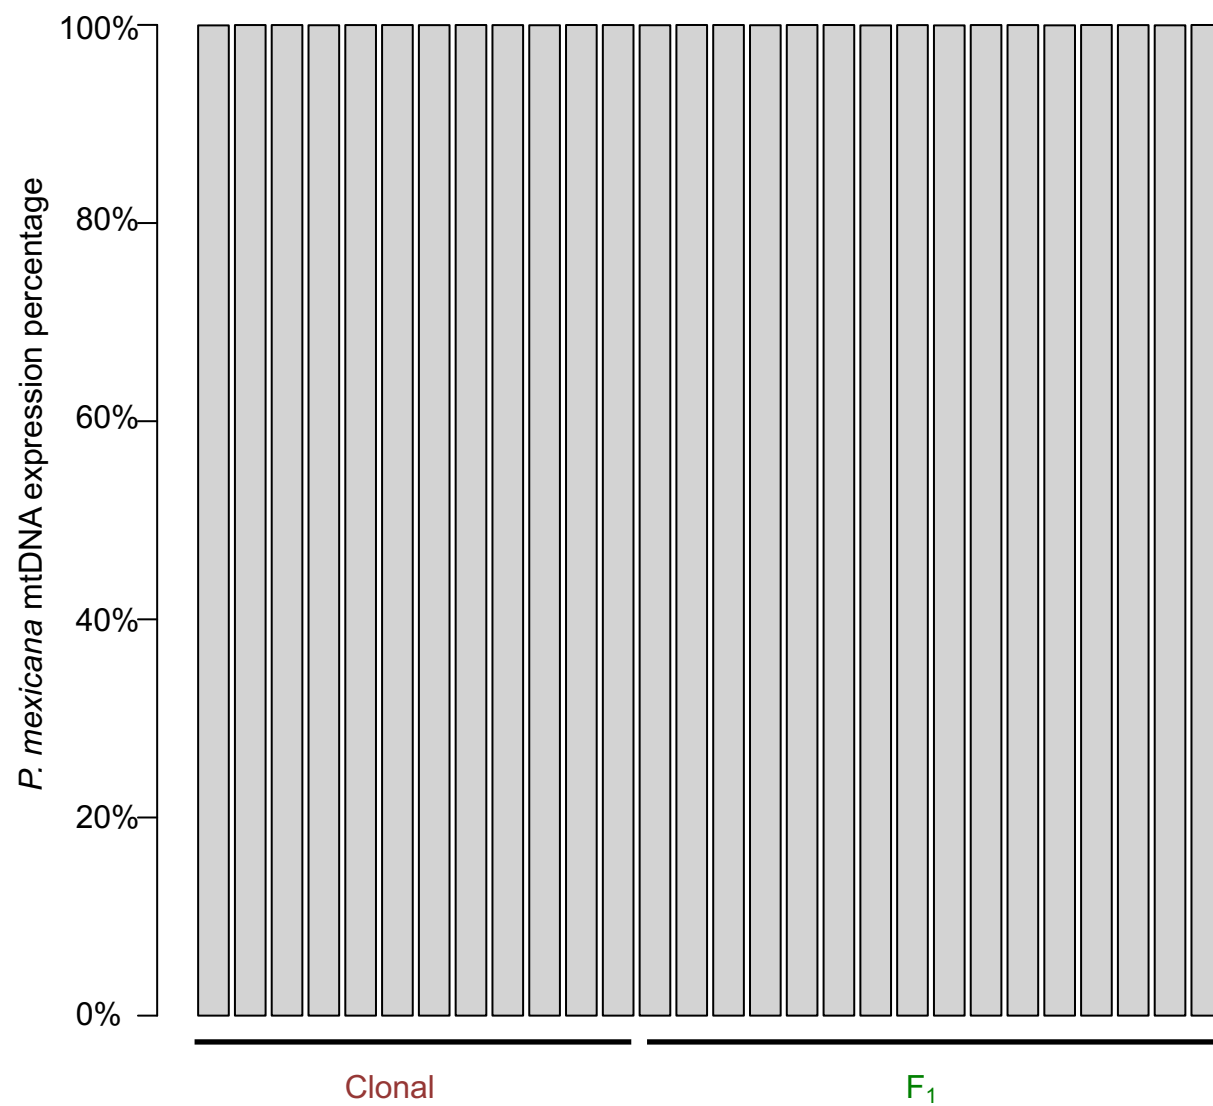

**Supplemental Figure S1. Mitochondria DNA expression in *P. formosa* and artificial interspecies hybrid** Sequencing reads were mapped to both *P. mexicana* and *P. latipinna* mitochondria genomes. To calculate mitochondria expression percentage, total read count from one species were divided by total mitochondria read count. Over 98.98% of sequencing reads sourced to mitochondria were from the *P. mexicana*.
