# Supplementary material for: Fixation of allelic gene expression landscapes and expression bias pattern shape the transcriptome of the clonal Amazon molly
Source: HighWire-hosted journal article supplement (doi:10.1101/gr.268870.120), 2021-02-05
Supplement: Supplemental_Fig_S2.pdf [file Supplemental_Fig_S2.pdf]

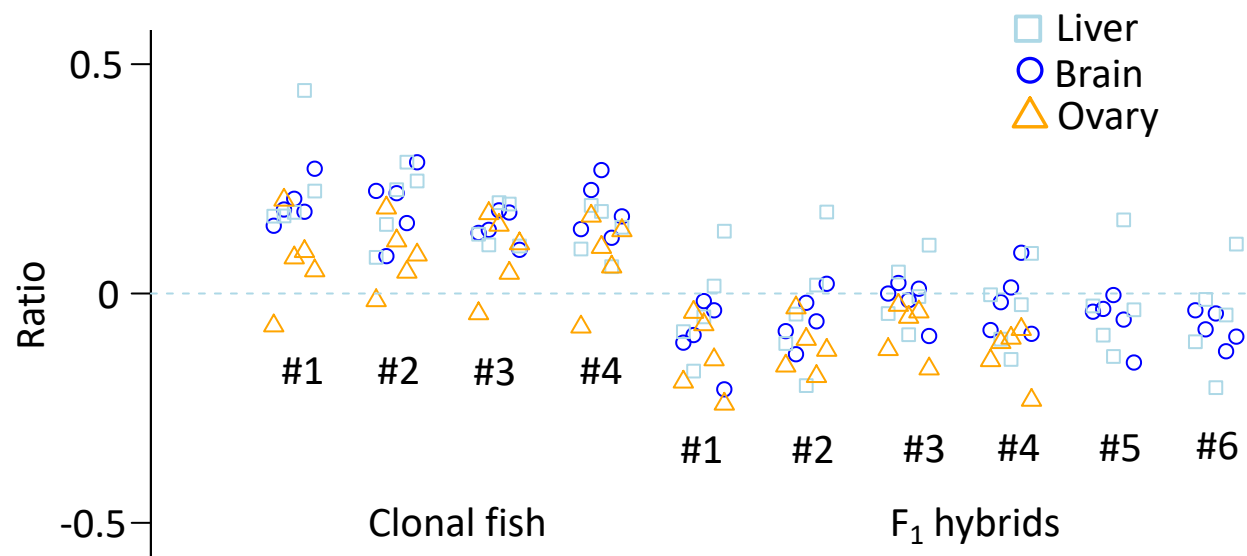

**Supplemental Figure S2. Allelic expression bias and gene expression level** Gene expression levels of each sample were arbitrarily grouped into 5 category (1<CPM<10; 10<CPM<30, 30<CPM<100, 100<CPM<300, CPM>300), number of genes that exhibited higher *P. latipinna* allele expression and number of genes that exhibited higher *P. mexicana* allele expression were used to calculate the ratio for each expression level group. For each sample, ratio values were listed as low to high expression groups.
