# Supplementary material for: Fixation of allelic gene expression landscapes and expression bias pattern shape the transcriptome of the clonal Amazon molly
Source: HighWire-hosted journal article supplement (doi:10.1101/gr.268870.120), 2021-02-05
Supplement: Supplemental_Fig_S3.pdf [file Supplemental_Fig_S3.pdf]

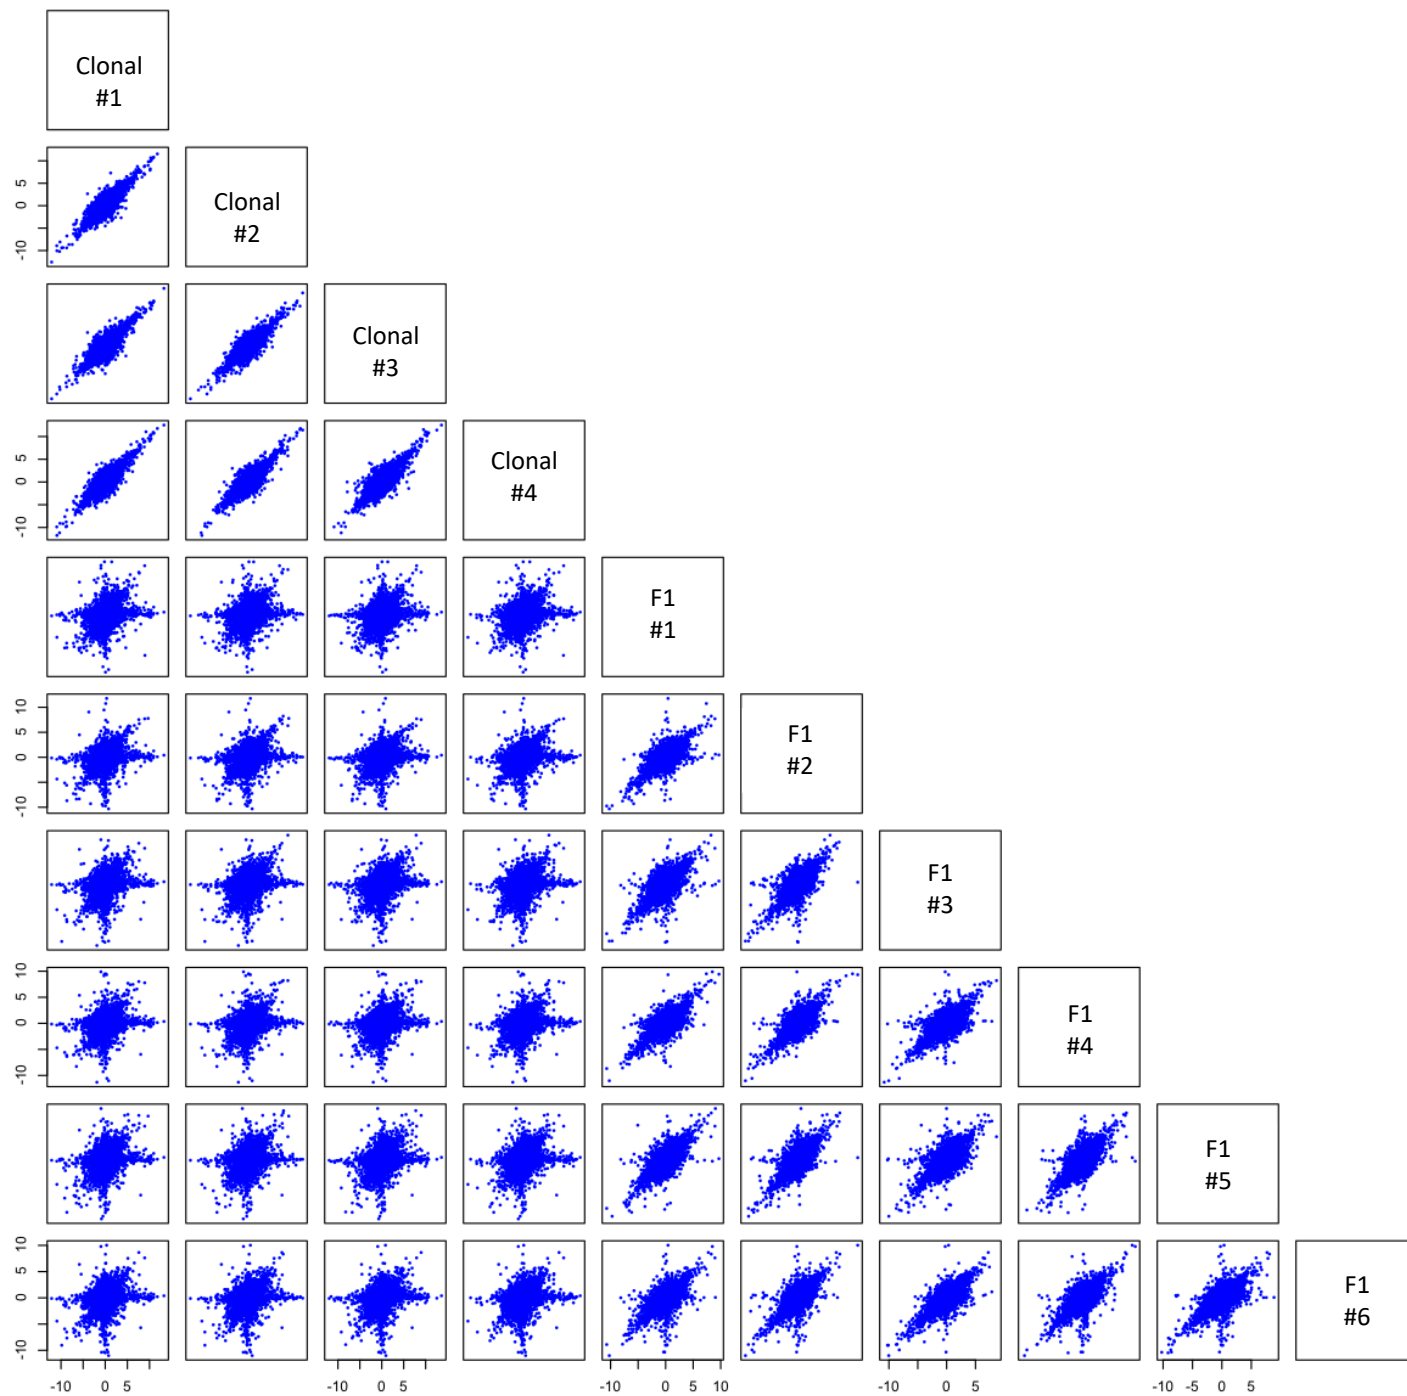

**Supplemental Figure S3. Inter-individual and inter-cohort allelic expression comparison (Brain)** Dot plots represent allele contribution comparison between two individual fish with the same or different cohorts. Coordinates of each plot x and y represent the allelic expression (*P. latipinna* allele expression / *P. mexicana* allele expression) of a gene in sample 1 and sample 2 in brain.
