# Supplementary material for: Fixation of allelic gene expression landscapes and expression bias pattern shape the transcriptome of the clonal Amazon molly
Source: HighWire-hosted journal article supplement (doi:10.1101/gr.268870.120), 2021-02-05
Supplement: Supplemental_Fig_S6.pdf [file Supplemental_Fig_S6.pdf]

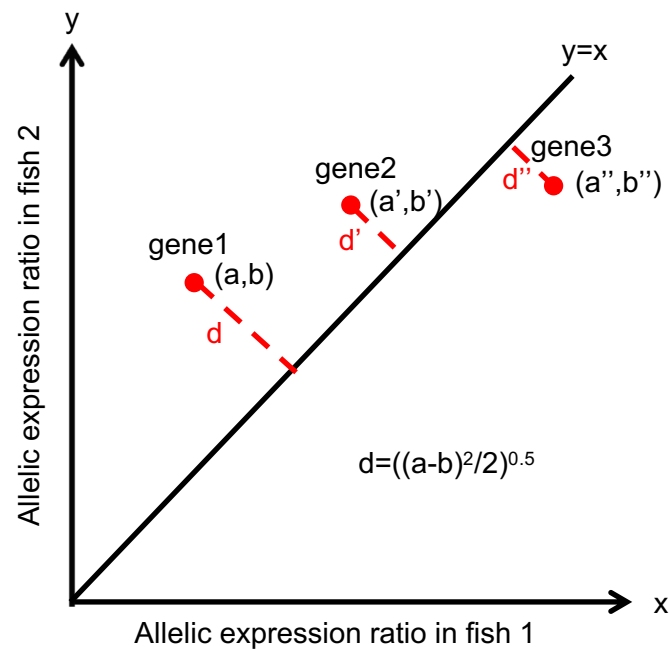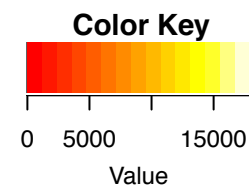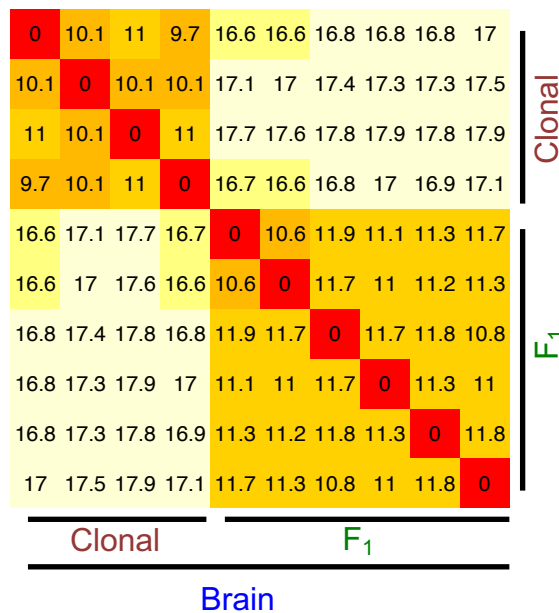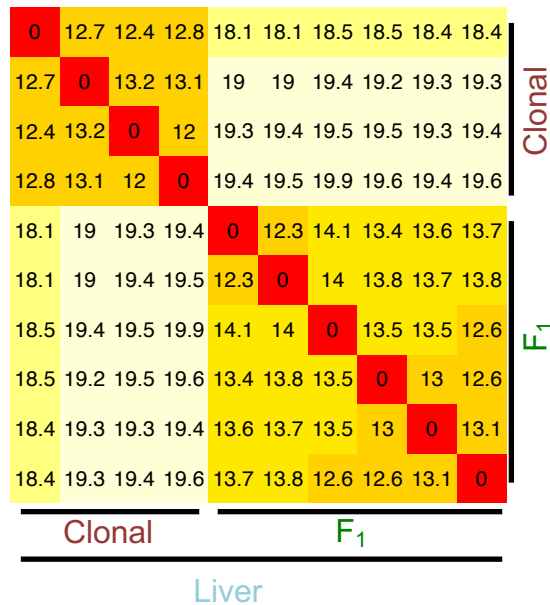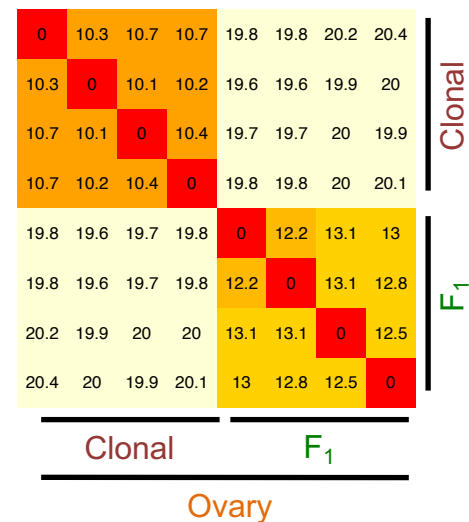

**Supplemental Figure S6. Comparison of clonal and F1 hybrid allelic expression ratios** Diagram showing how inter-individual AE pattern is quantified. Each axis represents AE ratio of an individual (i.e., Expression *P. latipinna* / Expression *P. mexicana*). The  $y=x$  represents a theoretic line where both individuals in comparison exhibit the same AE pattern. Each red dot represents a single gene, with x- and y- coordinates as a and b. Red dashed segment is distance from the dot to the theoretical line. The length d is calculated as  $d=((a-b)^2/2)^{0.5}$ . Heatmaps show total distance (i.e., total distance between each point and the center line in Supplemental Figures 3, 4 and 5) of inter-individual allelic expression patterns in brain, liver and ovary. Red color represents small numbers (similar allelic expression patterns), and yellow represent large numbers (diverged allelic expression patterns). Number in each color block represent the total distance/1000.
