# Supplementary material for: Fixation of allelic gene expression landscapes and expression bias pattern shape the transcriptome of the clonal Amazon molly
Source: HighWire-hosted journal article supplement (doi:10.1101/gr.268870.120), 2021-02-05
Supplement: Supplemental_Fig_S8.pdf [file Supplemental_Fig_S8.pdf]

*P. latipinna* biased

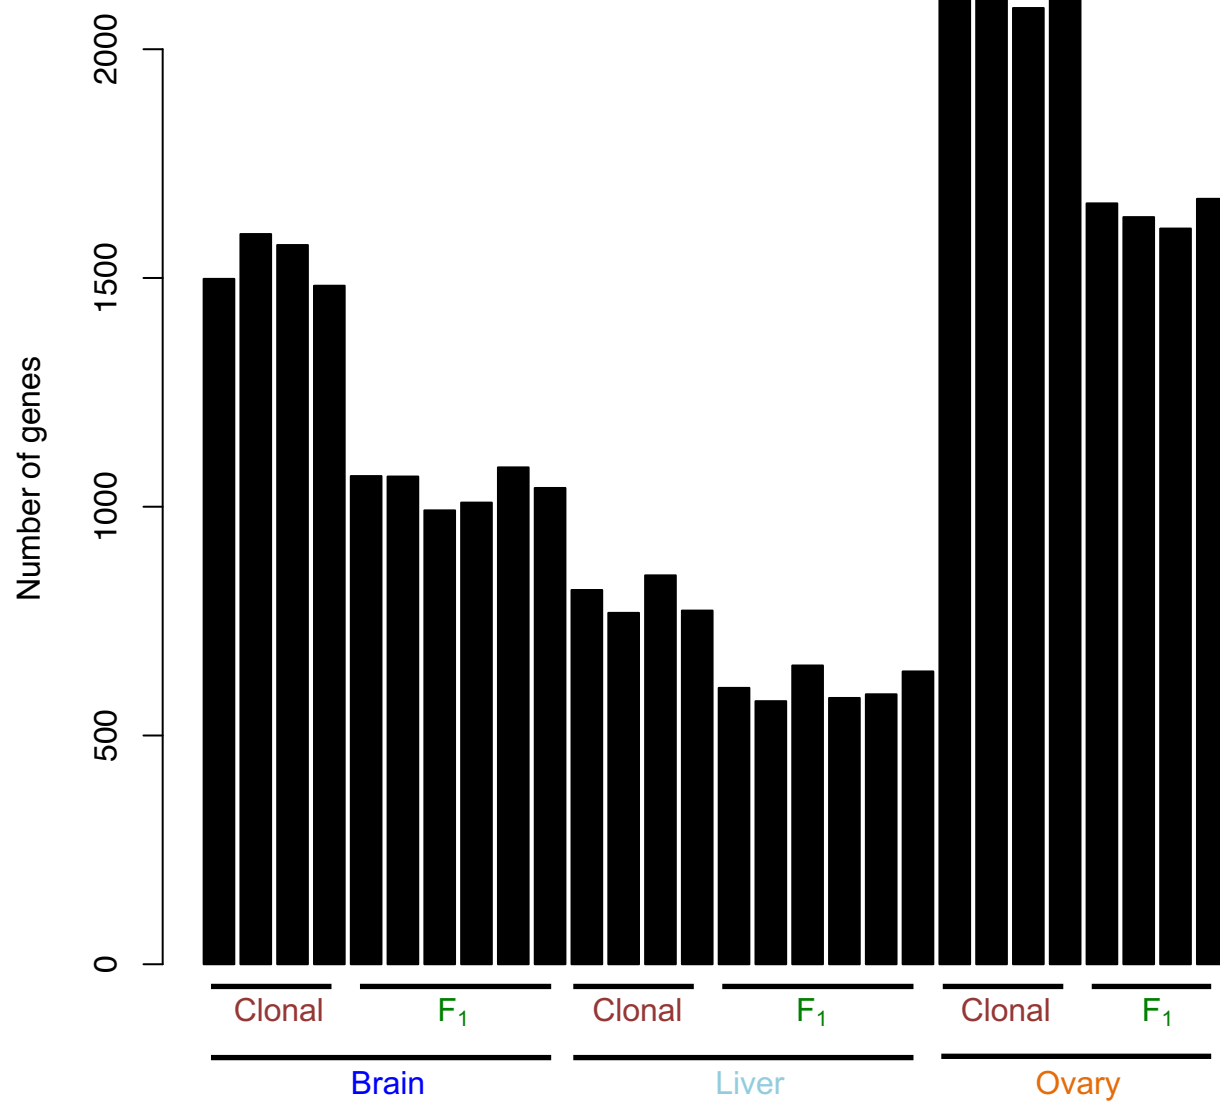

**Supplemental Figure S8. Number of genes showing *P. latipinna* allele dominated expression** Bar graph showing number of genes exhibiting *P. latipinna* allele dominated in brain, liver and ovary of *P. formosa* and F<sub>1</sub> hybrids.
