# Supplementary material for: Fixation of allelic gene expression landscapes and expression bias pattern shape the transcriptome of the clonal Amazon molly
Source: HighWire-hosted journal article supplement (doi:10.1101/gr.268870.120), 2021-02-05
Supplement: Supplemental_Fig_S9.pdf [file Supplemental_Fig_S9.pdf]

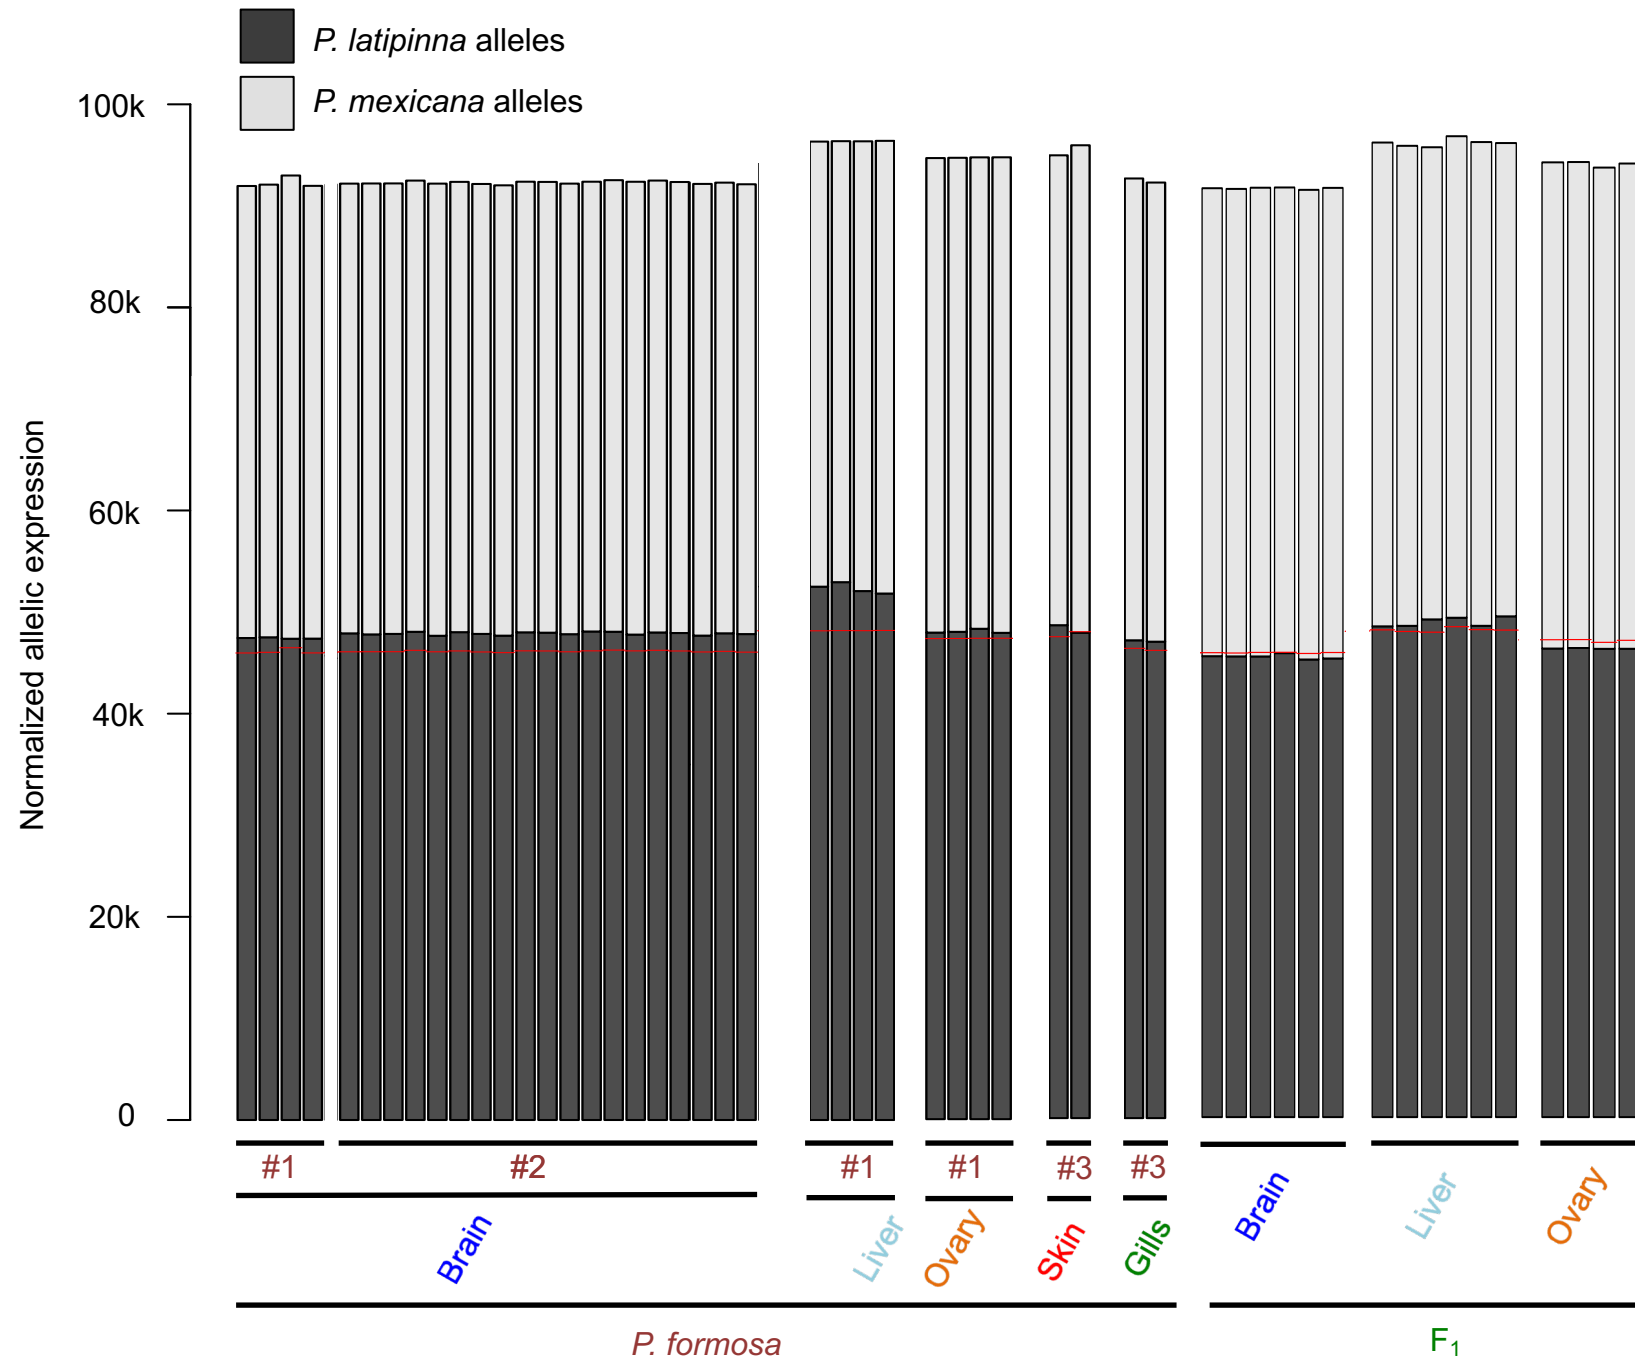

**Supplemental Figure S9. Allelic expression distribution of different clones of *P. formosa* and F<sub>1</sub> hybrid fish** Stacked bar graph showing normalized sequencing reads that mapped to *P. latipinna* and *P. mexicana* alleles. For each individual sample, the total normalized allelic expression is plotted for both parental alleles. The red lines represent 50% of the total gene expression. Sequencing reads that mapped to polymorphic sites between *P. latipinna* and *P. mexicana* alleles were used to calculate allelic contribution of gene expression after normalization to library size and allelic length. These reads were subsequently used to calculate allelic expression ratio, and further used to calculate allelic expression by adjusting gene expression to allelic expression ratios. Organs from 3 independent clones of *P. formosa* were assessed for allelic expression distribution analyses. These include: brains of clone #1 and #2; livers of clone #1; ovary of clone #1; skin and gills of clone #3.
