# Supplementary material for: Fixation of allelic gene expression landscapes and expression bias pattern shape the transcriptome of the clonal Amazon molly
Source: HighWire-hosted journal article supplement (doi:10.1101/gr.268870.120), 2021-02-05
Supplement: Supplemental_Fig_S10.pdf [file Supplemental_Fig_S10.pdf]

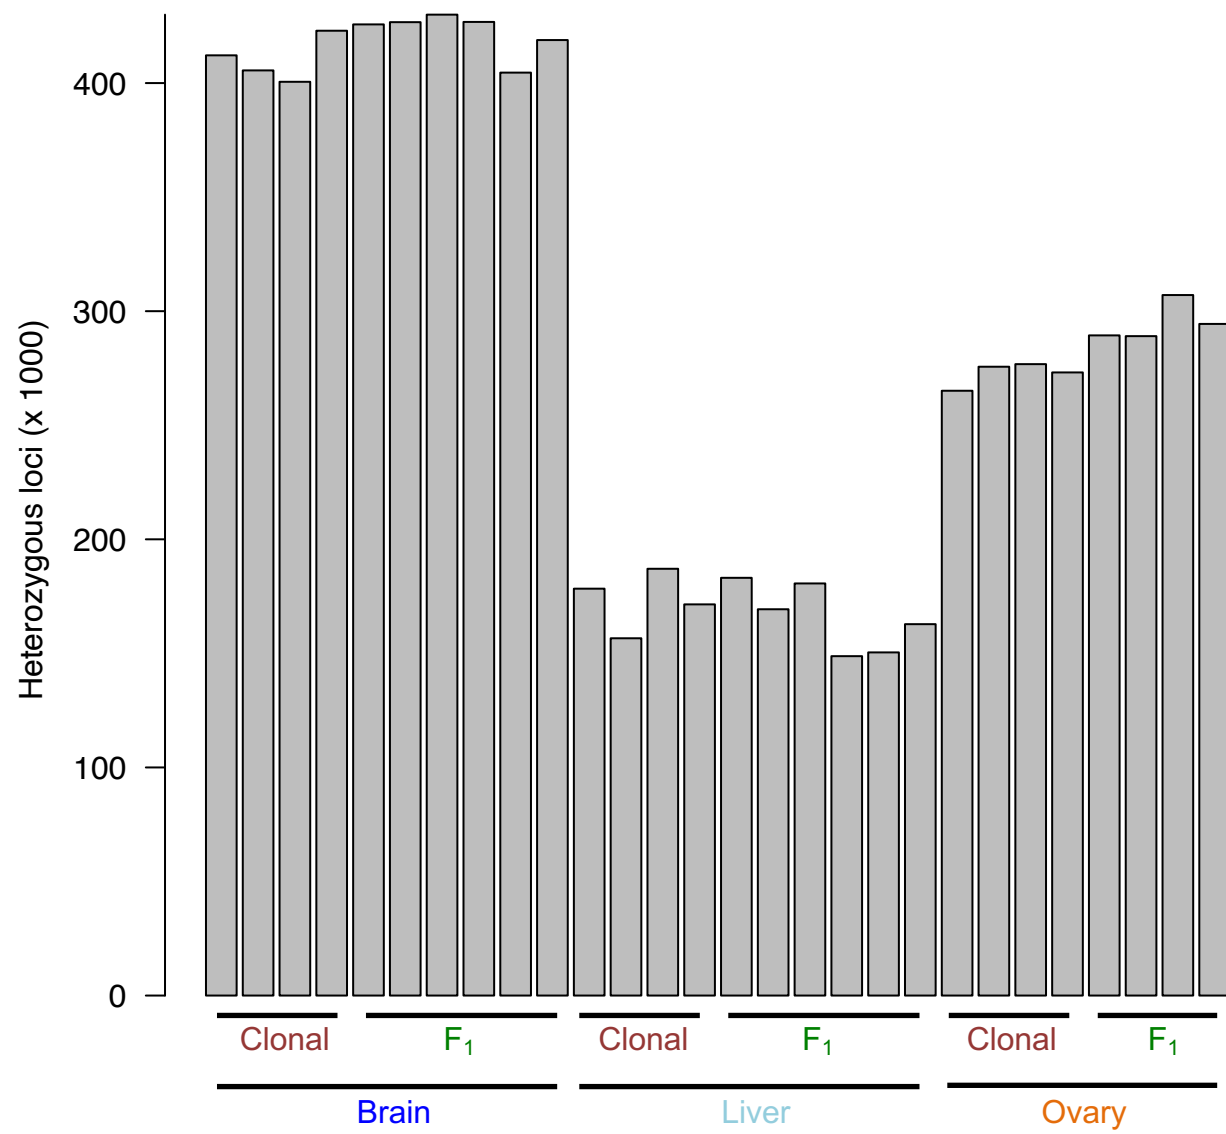

**Supplemental Figure S10. Comparison of heterozygosity between *P. formosa* and F<sub>1</sub> hybrids** Bar graph shows number of heterozygous loci estimated using RNA-seq data in *P. formosa* and F<sub>1</sub> sibling fish.
