# Supplementary material for: Fixation of allelic gene expression landscapes and expression bias pattern shape the transcriptome of the clonal Amazon molly
Source: HighWire-hosted journal article supplement (doi:10.1101/gr.268870.120), 2021-02-05
Supplement: Supplemental_Fig_S13.pdf [file Supplemental_Fig_S13.pdf]

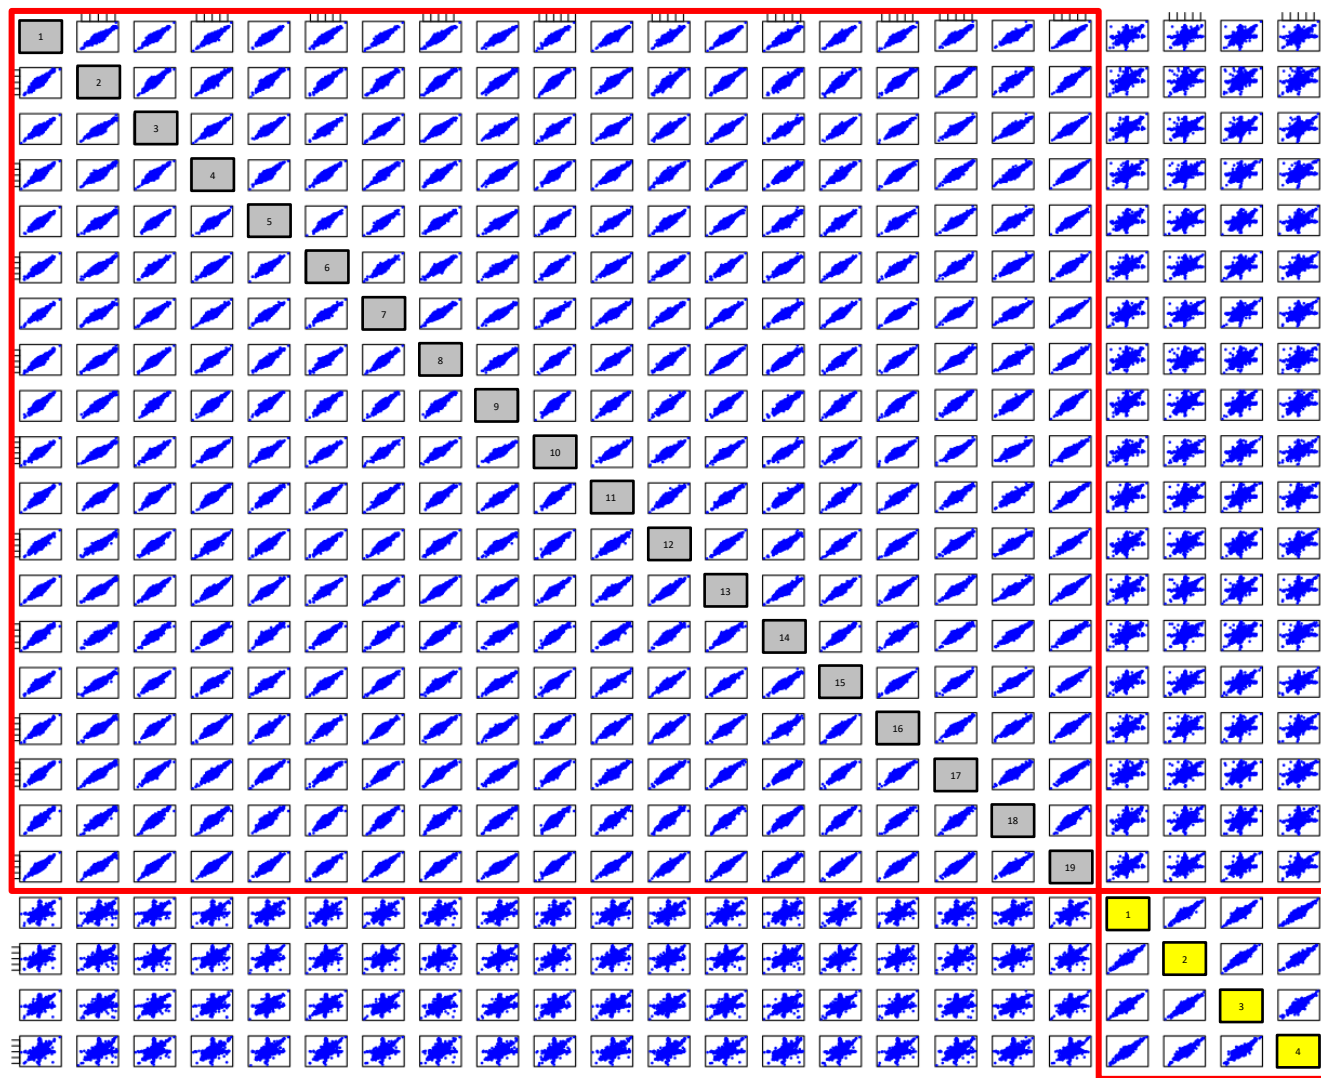

**Supplemental Figure S13. Intra-clone allelic expression pattern comparison**  
Parental allelic expression of two *P. formosa* families (red squares encircled) were compared at individual level. Coordinates of each plot x and y represent the allelic contribution (*P. latipinna* allele expression / *P. mexicana* allele expression) of a gene between 2 individuals. The similar the scatter pattern of all dots approximate to a line, the similar the parental allelic contribution to gene expression between two samples.
