# Supplementary material for: Fixation of allelic gene expression landscapes and expression bias pattern shape the transcriptome of the clonal Amazon molly
Source: HighWire-hosted journal article supplement (doi:10.1101/gr.268870.120), 2021-02-05
Supplement: Supplemental_Table_S1.xlsx [file Supplemental_Table_S1.xlsx]

## Sheet: Sheet1
Supplmental Table S1 RNA-Seq statistics
Sample.ID	name	Clean reads (M)
J392	Brain P.for clone1 #1	73.2662
J393	Liver P.for clone1 #1	73.1101
J394	Ovary P.for clone1 #1	73.0825
J395	Brain P.for clone1 #2	72.9412
J396	Liver P.for clone1 #2	73.7752
J397	Ovary P.for clone1 #2	72.7348
J416	Brain P.for clone1 #3	75.0415
J417	Liver P.for clone1 #3	73.1189
J418	Ovary P.for clone1 #3	72.8058
J419	Brain P.for clone1 #4	73.1356
J420	Liver P.for clone1 #4	73.5682
J421	Ovary P.for clone1 #4	72.7765
J431	Brain F1 #1	76.2007
J432	Liver F1 #1	77.2715
J433	Ovary F1 #1	76.814
J449	Brain F1 #2	76.5591
J450	Liver F1 #2	76.9794
J451	Ovary F1 #2	76.8356
J547	Brain F1 #3	73.0848
J548	Liver F1 #3	73.0548
J551	Brain F1 #4	72.8708
J552	Liver F1 #4	73.096
J553	Ovary F1 #4	72.7226
J555	Brain F1 #5	66.4933
J556	Liver F1 #5	73.7235
J557	Ovary F1 #5	73.4993
J559	Brain F1 #6	73.6367
J560	Liver F1 #6	73.1468
J575	Brain P.for clone2 #1	66.908
J573	Brain P.for clone2 #2	70.7498
J574	Brain P.for clone2 #3	70.8628
J576	Brain P.for clone2 #4	70.652
J577	Brain P.for clone2 #5	70.6583
J578	Brain P.for clone2 #6	70.7172
J580	Brain P.for clone2 #7	70.9057
J581	Brain P.for clone2 #8	71.0509
J582	Brain P.for clone2 #9	70.6848
J563	Brain P.for clone2 #10	67.3172
J564	Brain P.for clone2 #11	67.2273
J565	Brain P.for clone2 #12	67.2585
J566	Brain P.for clone2 #13	67.8969
J567	Brain P.for clone2 #14	66.8698
J568	Brain P.for clone2 #15	67.2894
J569	Brain P.for clone2 #16	67.0279
J570	Brain P.for clone2 #17	67.2362
J571	Brain P.for clone2 #18	68.1785
J572	Brain P.for clone2 #19	66.9548
