# Supplementary material for: Fixation of allelic gene expression landscapes and expression bias pattern shape the transcriptome of the clonal Amazon molly
Source: HighWire-hosted journal article supplement (doi:10.1101/gr.268870.120), 2021-02-05
Supplement: Supplemental_Table_S2.xlsx [file Supplemental_Table_S2.xlsx]

## Sheet: all
Supplemental Table S2. Allelic expression pattern of P. formosa and P. latipinna-P. mexicana interspecies hybrid
(a)	summary:brain		summary:liver		summary:ovary
	gene counts	percentage	gene counts	percentage	gene counts	percentage
clonal consistent	19118	0.905251	20051	0.949429	19435	0.920261
clonal inconsistent	2001	0.0947488	1068	0.0505706	1684	0.0797386
f1 consistent	18753	0.887968	19365	0.916947	18254	0.86434
f1 inconsistent	2366	0.112032	1754	0.0830532	2865	0.13566
clonal.no.bias_f1.no.bias	15985	0.756901	18014	0.852976	14549	0.688906
clonal.no.bias_f1.bias	182	0.00861783	95	0.00449832	397	0.0187982
clonal.no.bias_f1.inconsistent	1058	0.0500971	972	0.0460249	1287	0.0609404
clonal.bias_f1.no.bias	543	0.0257114	312	0.0147734	739	0.0349922
clonal.bias_f1.bias_reversed	22	0.00104172	27	0.00127847	72	0.00340925
clonal.bias_f1.bias_same	807	0.038212	317	0.0150102	1499	0.0709787
clonal.biased_f1.inconsistent	521	0.0246697	314	0.0148681	892	0.0422368
clonal.inconsistent_f1.no.bias	1052	0.049813	489	0.0231545	722	0.0341872
clonal.inconsistent_f1.bias	162	0.00767082	111	0.00525593	276	0.0130688
clonal.inconsistent_f1.inconsistent	787	0.037265	468	0.0221601	686	0.0324826
sum	21119	1	21119	1	21119	1
