# Supplementary material for: Fixation of allelic gene expression landscapes and expression bias pattern shape the transcriptome of the clonal Amazon molly
Source: HighWire-hosted journal article supplement (doi:10.1101/gr.268870.120), 2021-02-05
Supplement: Supplemental_Table_S3.xlsx [file Supplemental_Table_S3.xlsx]

## Sheet: Sheet1
Supplemental Table S3. Summarization of genes exhibiting different allelic expression pattern in each organ
		Brain	Liver	Ovary
No bias in clone, biased in F1	F1: P. latipinna allele favored	67	31	152
	F1: P. mexicana allele favored	115	64	245
Biased in clone, no biase in F1	Clonal: P. latipinna allele favored	347	167	462
	Clonal: P. mexicana allele favored	196	145	277
Biased in both, reversed pattern	Clonal: P. latipinna allele favored; F1: P. mexicana allele favored	18	23	52
	F1: P. latipinna allele favored; Clonal: P. mexicana allele favored	4	4	20
Total		747	434	1208
