# Supplementary material for: Fixation of allelic gene expression landscapes and expression bias pattern shape the transcriptome of the clonal Amazon molly
Source: HighWire-hosted journal article supplement (doi:10.1101/gr.268870.120), 2021-02-05
Supplement: Supplemental_Table_S4.xlsx [file Supplemental_Table_S4.xlsx]

## Sheet: Supplment Table 6.csv
Supplemental Table S4.Genes exhibiting different allelic expression bias between P. formosa and interspecies hybrid in brain
geneID	clonal allelic expression pattern (log p.lat/p.mex)	F1 allelic expression pattern (log p.lat/p.mex)	Locus	Protein.name
103140143	0	-12.9845	fgf13	fibroblast growth factor 13 isoform X1
103156575	0	-12.5245	akap11	A-kinase anchor protein 11 isoform X1
103144823	0	-11.0082	znf330	zinc finger protein 330
103150189	0	-10.0911	c1galt1c1	C1GALT1-specific chaperone 1
103150172	0	-10.0347	xkrx	XK-related protein 2
103151374	0	-9.91727	LOC103151374	venom prothrombin activator omicarin-C non-catalytic subunit
103140155	0	-9.89036	LOC103140155	tumor necrosis factor ligand superfamily member 6-like
103129189	0	-9.48051	scnm1	sodium channel modifier 1 isoform X2
103150183	0	-9.39749	sash3	SAM and SH3 domain-containing protein 3
103140162	0	-9.17629	LOC103140162	sodium/hydrogen exchanger 6
103141890	0	-9.0354	LOC103141890	1-phosphatidylinositol 4,5-bisphosphate phosphodiesterase gamma-1-like
103150176	0	-8.96312	LOC103150176	mid1-interacting protein 1-like
103140163	0	-8.59037	taf7	transcription initiation factor TFIID subunit 7
103150188	0	-8.49725	clic2	chloride intracellular channel protein 2
103146568	0	-8.09466	ccdc94	coiled-coil domain-containing protein 94
103150178	0	-7.66947	srpx2	sushi repeat-containing protein SRPX2
103135526	0	-7.60518	rbm22	pre-mRNA-splicing factor RBM22
103140149	0	-7.35188	tm9sf2	transmembrane 9 superfamily member 2 isoform X2
103153671	0	-7.26804	isg20l2	interferon-stimulated 20 kDa exonuclease-like 2 isoform X1
103150170	0	-6.86264	tmem35	transmembrane protein 35
103153670	0	-6.01072	rrnad1	protein RRNAD1
103145239	0	-5.55511	LOC103145239	solute carrier family 12 member 9-like
103152939	0	-5.34366	pcdh19	protocadherin-19 isoform X1
103129370	0	-5.33976	ssbp1	single-stranded DNA-binding protein, mitochondrial
103140991	0	-5.23342	LOC103140991	uncharacterized protein LOC103140991
103140206	0	-5.19572	pex26	peroxisome assembly protein 26
103145559	0	-5.18422	p2ry6	P2Y purinoceptor 6
103150175	0	-5.12591	bcorl1	BCL-6 corepressor-like protein 1 isoform X1
103152332	0	-4.95883	LOC103152332	uncharacterized protein LOC103152332
103150174	0	-4.9197	cstf2	cleavage stimulation factor subunit 2
103151649	0	-4.87822	LOC103151649	protein NLRC3-like isoform X1
103141069	0	-4.75873	ttc1	tetratricopeptide repeat protein 1
103140146	0	-4.59882	LOC103140146	zinc finger protein ZIC 3
103133041	0	-4.39979	LOC103133041	NF-kappa-B-activating protein-like isoform X3
103151378	0	-4.37216	LOC103151378	coiled-coil domain-containing protein 80-like
103130802	0	-4.2801	pdhb	pyruvate dehydrogenase E1 component subunit beta, mitochondrial
103154134	0	-4.08667	LOC103154134	SH3 domain-binding protein 4
103150192	0	-3.89989	lamp2	lysosome-associated membrane glycoprotein 2 isoform X1
103136510	0	-3.80154	pbld	phenazine biosynthesis-like domain-containing protein
103152856	0	-3.76513	LOC103152856	septin-7 isoform X2
103144396	0	-3.73427	LOC103144396	dihydrofolate reductase-like
103140378	0	-3.71723	rnaseh2b	ribonuclease H2 subunit B isoform X1
103148074	0	-3.63209	LOC103148074	P2Y purinoceptor 12-like
103140141	0	-3.45683	mcf2	proto-oncogene DBL isoform X1
103136786	0	-3.44525	LOC103136786	tubulin beta chain
103130801	0	-3.41907	LOC103130801	uncharacterized protein LOC103130801 isoform X1
103142503	0	-3.27429	csnk2a2	casein kinase II subunit alpha\'
103146416	0	-3.24417	LOC103146416	zinc transporter Slc39a7-like isoform X2
103150186	0	-3.21075	ocrl	inositol polyphosphate 5-phosphatase OCRL-1 isoform X2
103149039	0	-2.95424	rnf175	RING finger protein 175
103150187	0	-2.94555	LOC103150187	protein eva-1 homolog C-like isoform X2
103141792	0	-2.83107	ubox5	RING finger protein 37
103138959	0	-2.73612	LOC103138959	ubiquitin domain-containing protein 2-like
103152617	0	-2.73529	sncaip	synphilin-1
103155840	0	-2.661	LOC103155840	transmembrane protein FAM155A-like
103144394	0	-2.6526	LOC103144394	cryptochrome-1-like isoform X2
103149344	0	-2.57859	nit2	omega-amidase NIT2
103140154	0	-2.55405	arhgef6	rho guanine nucleotide exchange factor 6 isoform X1
103156191	0	-2.39196	prkx	cAMP-dependent protein kinase catalytic subunit PRKX isoform X2
103155120	0	-2.38545	garem2	GRB2-associated and regulator of MAPK protein 2
103153582	0	-2.28654	LOC103153582	leucine-rich repeat-containing protein 4C-like
103139602	0	-2.13441	taok1	serine/threonine-protein kinase TAO1
103136241	0	-2.13339	drd2	D(2) dopamine receptor
103140958	0	-2.10123	LOC103140958	metalloproteinase inhibitor 2-like
103134210	0	-2.08109	LOC103134210	vang-like protein 1 isoform X2
103149137	0	-1.99015	LOC103149137	palmitoyltransferase ZDHHC3-like
103130803	0	-1.96692	pxk	PX domain-containing protein kinase-like protein isoform X1
103134246	0	-1.84994	cog3	conserved oligomeric Golgi complex subunit 3
103138305	0	-1.78022	sptbn4	spectrin beta chain, non-erythrocytic 4 isoform X1
103155662	0	-1.775	xpc	DNA repair protein complementing XP-C cells
103131100	0	-1.71076	LOC103131100	PEX5-related protein-like
103147202	0	-1.7071	LOC103147202	cystathionine beta-synthase-like
103129360	0	-1.69689	sccpdh	saccharopine dehydrogenase-like oxidoreductase isoform X1
103154331	0	-1.64529	pcmt1	protein-L-isoaspartate(D-aspartate) O-methyltransferase isoform X1
103136823	0	-1.6352	LOC103136823	nectin-2-like
103154430	0	-1.5736	pdss2	decaprenyl-diphosphate synthase subunit 2 isoform X1
103152398	0	-1.55643	atp2a2	sarcoplasmic/endoplasmic reticulum calcium ATPase 2 isoform X2
103141867	0	-1.53346	LOC103141867	DNA topoisomerase 1-like
103150589	0	-1.50484	kcnj3	G protein-activated inward rectifier potassium channel 1
103156412	0	-1.43344	cfap61	cilia- and flagella-associated protein 61 isoform X1
103140517	0	-1.41641	dpp6	dipeptidyl aminopeptidase-like protein 6 isoform X5
103129256	0	-1.4112	asun	protein asunder homolog isoform X2
103146545	0	-1.39358	LOC103146545	endophilin-B1-like
103145477	0	-1.35043	LOC103145477	MHC class II regulatory factor RFX1-like isoform X1
103134820	0	-1.33128	LOC103134820	semaphorin-5B
103132342	0	-1.32567	wdr59	WD repeat-containing protein 59 isoform X2
103152064	0	-1.27467	LOC103152064	microtubule-associated tumor suppressor candidate 2 isoform X2
103139681	0	-1.26459	LOC103139681	cell adhesion molecule 1-like
103142518	0	-1.22762	LOC103142518	septin-7-like
103152615	0	-1.14255	LOC103152615	discoidin domain-containing receptor 2-like isoform X1
103136794	0	-1.13632	abhd16a	protein ABHD16A
103156884	0	-1.12766	lpl	lipoprotein lipase
103143924	0	-1.11155	psip1	PC4 and SFRS1-interacting protein isoform X3
103151387	0	-1.10569	cask	peripheral plasma membrane protein CASK isoform X1
103138009	0	-1.10273	LOC103138009	supervillin-like isoform X1
103147691	0	-1.08397	LOC103147691	B-cell lymphoma/leukemia 11B-like
103130396	0	-1.04289	ints8	integrator complex subunit 8 isoform X2
103138124	0	-1.03723	hibch	3-hydroxyisobutyryl-CoA hydrolase, mitochondrial
103141076	0	-1.01149	LOC103141076	rab proteins geranylgeranyltransferase component A 1-like isoform X1
103134206	0	-0.994926	dopey2	protein dopey-2 isoform X2
103147133	0	-0.97675	LOC103147133	mitogen-activated protein kinase kinase kinase kinase 4-like isoform X1
103156123	0	-0.956903	snph	syntaphilin isoform X4
103140996	0	-0.945377	LOC103140996	heme oxygenase 2-like isoform X1
103131073	0	-0.892756	LOC103131073	TOM1-like protein 2 isoform X2
103156427	0	-0.880363	patl1	protein PAT1 homolog 1 isoform X2
103140782	0	-0.802713	fam189b	protein FAM189B
103140930	0	-0.791926	LOC103140930	serine/threonine-protein kinase LMTK1-like isoform X1
103152224	0	-0.785351	slit1	slit homolog 1 protein isoform X4
103147442	0	-0.729628	LOC103147442	protocadherin gamma-A2-like isoform X4
103133900	0	-0.689915	LOC103133900	adenylosuccinate synthetase isozyme 2-like
103140103	0	-0.660564	LOC103140103	ubiquitin-like protein 3
103150932	0	-0.623986	LOC103150932	CLIP-associating protein 1-B-like isoform X12
103153672	0	-0.571652	LOC103153672	brevican core protein-like isoform X1
103130694	0	-0.567548	LOC103130694	caskin-1-like
103145230	0	-0.541415	scg2	secretogranin-2
103149314	0	0.469814	ctsw	cathepsin W
103150321	0	0.546518	cspg5	chondroitin sulfate proteoglycan 5 isoform X1
103144336	0	0.581027	LOC103144336	period circadian protein homolog 3 isoform X1
103147594	0	0.641849	slc6a15	sodium-dependent neutral amino acid transporter B(0)AT2
103146711	0	0.745807	add2	beta-adducin isoform X1
103148025	0	0.746736	LOC103148025	high mobility group nucleosome-binding domain-containing protein 3-like isoform X2
103148889	0	0.889594	dgcr2	integral membrane protein DGCR2/IDD isoform X2
103133657	0	0.944172	man2a2	alpha-mannosidase 2x isoform X2
103148522	0	0.948024	LOC103148522	14-3-3 protein gamma-B
103154398	0	0.9596	LOC103154398	erythrocyte band 7 integral membrane protein-like isoform X1
103143970	0	1.02079	dpy19l3	probable C-mannosyltransferase DPY19L3
103138236	0	1.08477	pak1	serine/threonine-protein kinase PAK 1 isoform X1
103133850	0	1.12368	dhrs11	dehydrogenase/reductase SDR family member 11 isoform X1
103153357	0	1.1256	dda1	DET1- and DDB1-associated protein 1 isoform X1
103146527	0	1.18218	slc7a14	probable cationic amino acid transporter
103156586	0	1.20868	wdr7	WD repeat-containing protein 7 isoform X2
103147544	0	1.24644	dnajc13	dnaJ homolog subfamily C member 13 isoform X7
103149002	0	1.25131	hectd2	probable E3 ubiquitin-protein ligase HECTD2
103156209	0	1.29496	ndufa11	NADH dehydrogenase
103135833	0	1.33817	homer1	homer protein homolog 1 isoform X1
103154224	0	1.34175	LOC103154224	myelin transcription factor 1-like isoform X1
103131053	0	1.39803	ezh2	histone-lysine N-methyltransferase EZH2
103139809	0	1.51418	LOC103139809	guanine nucleotide exchange factor DBS-like isoform X1
103131168	0	1.57578	LOC103131168	protein O-GlcNAcase-like
103137294	0	1.82611	nudt6	nucleoside diphosphate-linked moiety X motif 6
103138219	0	1.83688	LOC103138219	transmembrane and coiled-coil domains protein 1-like isoform X1
103156444	0	1.88968	acaa1	3-ketoacyl-CoA thiolase, peroxisomal
103156293	0	1.90133	LOC103156293	gelsolin isoform X1
103156733	0	1.91197	pphln1	periphilin-1 isoform X1
103147625	0	1.91354	LOC103147625	extended synaptotagmin-1-like
103156447	0	1.93891	ndufaf5	NADH dehydrogenase
103131460	0	1.9673	sqrdl	sulfide:quinone oxidoreductase, mitochondrial
103138378	0	2.02152	LOC103138378	serine/threonine-protein kinase OSR1-like
103147124	0	2.05549	fastkd2	FAST kinase domain-containing protein 2
103145429	0	2.09997	sez6l2	seizure 6-like protein 2 isoform X2
103134287	0	2.10319	mettl8	methyltransferase-like protein 8
103154614	0	2.1666	tmem25	transmembrane protein 25
103155010	0	2.28632	LOC103155010	phospholipid phosphatase-related protein type 5 isoform X1
103150072	0	2.32715	loxl3	lysyl oxidase homolog 3 isoform X3
103152078	0	2.38622	LOC103152078	bone morphogenetic protein receptor type-2-like
103142494	0	2.50087	tcp11l1	T-complex protein 11-like protein 1
103143813	0	2.5735	LOC103143813	interferon-induced protein 44-like isoform X3
103155372	0	2.57494	ascc3	activating signal cointegrator 1 complex subunit 3
103156593	0	2.58479	LOC103156593	hippocampus abundant transcript 1 protein-like isoform X1
103153201	0	3.37804	evpl	envoplakin
103153908	0	3.95019	LOC103153908	poly
103131458	0	4.22212	parp16	mono
103152671	0	4.49791	LOC103152671	gastrula zinc finger protein xFG20-1-like
103156302	0	4.55216	LOC103156302	uncharacterized protein LOC103156302
103133147	0	5.01392	LOC103133147	cat eye syndrome critical region protein 5-like
103147158	0	5.33421	mdh1b	putative malate dehydrogenase 1B isoform X2
103146344	0	5.68643	LOC103146344	noelin-3-like
103156773	0	5.77413	tkfc	triokinase/FMN cyclase
103155841	0	7.16007	cpo	carboxypeptidase O isoform X2
103143419	0	7.53407	LOC103143419	synaptopodin-2-like isoform X2
103154223	0	8.5703	LOC103154223	protein-serine O-palmitoleoyltransferase porcupine-like isoform X1
103152702	0	9.51408	LOC103152702	hyaluronidase-like isoform X1
103135933	0	9.51702	LOC103135933	proteinase-activated receptor 2
103139290	0	9.93059	LOC103139290	Na(+)/H(+) exchanger beta-like isoform X1
103138344	0	10.0169	LOC103138344	scavenger receptor cysteine-rich type 1 protein M130-like, partial
103152630	0	10.0285	LOC103152630	zinc finger protein OZF-like
103131702	0	10.4535	LOC103131702	serpin H1-like
103131703	0	11.0631	acer3	alkaline ceramidase 3
103130300	0	12.1068	ssu72	RNA polymerase II subunit A C-terminal domain phosphatase SSU72
103152687	0	12.2316	nploc4	nuclear protein localization protein 4 homolog
103130301	0	12.2624	LOC103130301	fibronectin type-III domain-containing transmembrane protein C1orf233 homolog
103135431	0	12.8931	plk2	serine/threonine-protein kinase PLK2
103130783	-14.4433	0	canx	calnexin isoform X3
103142392	-14.1601	0	LOC103142392	60S ribosomal protein L15
103151290	-12.794	0	apex1	DNA-(apurinic or apyrimidinic site) lyase
103131211	-12.7189	0	ube2d3	ubiquitin-conjugating enzyme E2 D3
103142401	-12.653	0	eepd1	endonuclease/exonuclease/phosphatase family domain-containing protein 1
103131216	-12.5255	0	LOC103131216	selenoprotein T2-like
103140869	-12.4527	0	erp44	endoplasmic reticulum resident protein 44
103137763	-12.3807	0	LOC103137763	UPF0739 protein C1orf74 homolog
103141653	-12.2633	0	ndufb10	NADH dehydrogenase
103156433	-12.1714	0	LOC103156433	high mobility group protein B2-like
103132424	-12.1684	0	LOC103132424	polyadenylate-binding protein-interacting protein 2
103131222	-11.8452	0	tbc1d9b	TBC1 domain family member 9B isoform X2
103142373	-11.6856	0	ctps1	CTP synthase 1
103137349	-11.6156	0	pitx2	pituitary homeobox 2 isoform X2
103142389	-11.5895	0	ube2e1	ubiquitin-conjugating enzyme E2 E1
103137357	-11.4448	0	lingo2	leucine-rich repeat and immunoglobulin-like domain-containing nogo receptor-interacting protein 2
103131288	-11.4349	0	LOC103131288	choline transporter-like protein 1
103156432	-11.3239	0	LOC103156432	phosphomannomutase 2-like
103155973	-11.1882	0	b4galt1	beta-1,4-galactosyltransferase 1
103155988	-11.1419	0	LOC103155988	heterogeneous nuclear ribonucleoprotein A0-like
103142372	-11.1339	0	LOC103142372	glucocorticoid modulatory element-binding protein 1-like isoform X2
103137354	-11.13	0	LOC103137354	eukaryotic translation initiation factor 4E-1A isoform X2
103131209	-11.0863	0	nfkb1	LOW QUALITY PROTEIN: nuclear factor NF-kappa-B p105 subunit
103155971	-11.0176	0	tgfbi	transforming growth factor-beta-induced protein ig-h3
103151028	-10.9299	0	denr	density-regulated protein isoform X3
103142397	-10.7713	0	ngly1	peptide-N(4)-(N-acetyl-beta-glucosaminyl)asparagine amidase isoform X4
103141651	-10.7576	0	LOC103141651	testis-expressed sequence 2 protein-like
103140203	-10.7413	0	LOC103140203	proline-rich transmembrane protein 1-like
103146638	-10.6202	0	LOC103146638	UPF0687 protein C20orf27 homolog
103154462	-10.546	0	LOC103154462	oxidative stress-induced growth inhibitor 2-like
103155966	-10.4824	0	arap3	LOW QUALITY PROTEIN: arf-GAP with Rho-GAP domain, ANK repeat and PH domain-containing protein 3
103137352	-10.4618	0	gar1	H/ACA ribonucleoprotein complex subunit 1
103141313	-10.4537	0	athl1	acid trehalase-like protein 1
103142391	-10.154	0	nkiras1	NF-kappa-B inhibitor-interacting Ras-like protein 1 isoform X1
103140963	-10.1137	0	LOC103140963	synaptogyrin-2-like
103131459	-10.0205	0	LOC103131459	CTD small phosphatase-like protein 2-A isoform X2
103155991	-10.0118	0	fam13b	protein FAM13B isoform X7
103155912	-9.84459	0	arl6ip1	ADP-ribosylation factor-like protein 6-interacting protein 1
103155974	-9.82108	0	rest	RE1-silencing transcription factor
103155972	-9.81858	0	exosc3	exosome complex component RRP40
103142408	-9.78476	0	rpa3	replication protein A 14 kDa subunit
103132583	-9.72159	0	nwd1	NACHT domain- and WD repeat-containing protein 1 isoform X1
103142393	-9.69403	0	nr1d2	nuclear receptor subfamily 1 group D member 2
103131218	-9.64807	0	rnf4	E3 ubiquitin-protein ligase RNF4
103141650	-9.64009	0	msrb1	methionine-R-sulfoxide reductase B1
107836908	-9.58284	0	umad1	UBAP1-MVB12-associated (UMA)-domain containing protein 1
103142417	-9.50423	0	anln	actin-binding protein anillin
103147148	-9.50255	0	LOC103147148	protein-tyrosine kinase 2-beta-like
103131217	-9.50153	0	LOC103131217	mitochondrial inner membrane protein COX18 isoform X1
103153203	-9.47063	0	polg2	DNA polymerase subunit gamma-2, mitochondrial isoform X1
103136243	-9.44834	0	LOC103136243	sodium channel subunit beta-3-like isoform X2
103142398	-9.4036	0	oxsm	3-oxoacyl
103142400	-9.38689	0	LOC103142400	septin-7-like isoform X1
103143653	-9.27006	0	emp1	epithelial membrane protein 1 isoform X1
103141965	-9.14845	0	LOC103141965	3-oxoacyl
103130096	-9.14352	0	LOC103130096	histone-lysine N-methyltransferase SETDB2
103155997	-9.00826	0	LOC103155997	E3 ubiquitin-protein ligase RNF130-like
103141613	-8.95756	0	dxo	decapping and exoribonuclease protein
103155957	-8.9355	0	LOC103155957	transcription cofactor HES-6-like
103134884	-8.70278	0	LOC103134884	C-C motif chemokine 3-like
103155990	-7.7809	0	LOC103155990	kelch-like protein 3 isoform X1
103131285	-7.65392	0	tbc1d2	TBC1 domain family member 2A isoform X1
103151292	-7.53869	0	LOC103151292	zinc finger protein 420-like
103150009	-6.80201	0	LOC103150009	uncharacterized protein LOC103150009
103142402	-6.78132	0	kiaa0895	uncharacterized protein KIAA0895 homolog isoform X1
103142396	-6.50778	0	top2b	DNA topoisomerase 2-beta isoform X1
103155843	-6.46121	0	LOC103155843	E3 ubiquitin/ISG15 ligase TRIM25-like isoform X1
103130138	-6.12891	0	scly	selenocysteine lyase
103142438	-6.12521	0	LOC103142438	exocyst complex component 3-like protein isoform X2
103151288	-5.79077	0	LOC103151288	uncharacterized protein LOC103151288 isoform X1
103148496	-5.71993	0	LOC103148496	keratin-like protein KRT222 isoform X1
103147149	-5.66438	0	arhgef7	rho guanine nucleotide exchange factor 7 isoform X3
103135354	-5.53669	0	gcnt1	beta-1,3-galactosyl-O-glycosyl-glycoprotein beta-1,6-N-acetylglucosaminyltransferase
103137670	-5.53072	0	gpatch11	G patch domain-containing protein 11
103137771	-5.32108	0	tomm6	mitochondrial import receptor subunit TOM6 homolog
103132422	-5.17662	0	LOC103132422	matrin-3-like isoform X1
103129193	-5.12172	0	LOC103129193	induced myeloid leukemia cell differentiation protein Mcl-1 homolog
103138969	-5.11056	0	ublcp1	ubiquitin-like domain-containing CTD phosphatase 1
103155911	-4.92105	0	LOC103155911	serine/arginine repetitive matrix protein 2-like isoform X2
103153272	-4.80433	0	LOC103153272	protein delta homolog 1 isoform X1
103153473	-4.68965	0	vps13d	LOW QUALITY PROTEIN: vacuolar protein sorting-associated protein 13D
103146978	-4.65073	0	impad1	inositol monophosphatase 3
103134553	-4.64474	0	gpd1	glycerol-3-phosphate dehydrogenase
103135893	-4.63669	0	nsa2	ribosome biogenesis protein NSA2 homolog
103153916	-4.57451	0	LOC103153916	interferon alpha/beta receptor 2-like isoform X1
103156429	-4.56212	0	LOC103156429	myotubularin-related protein 7-like isoform X1
103156060	-4.51254	0	LOC103156060	cationic trypsin-like isoform X1
103136040	-4.46318	0	LOC103136040	integrin alpha-7 isoform X1
103131212	-4.45202	0	polr2b	DNA-directed RNA polymerase II subunit RPB2 isoform X1
103141663	-4.40606	0	srebf1	sterol regulatory element-binding protein 1
103142378	-4.25842	0	LOC103142378	forkhead box protein O6-like
103148521	-4.24316	0	sftpb	pulmonary surfactant-associated protein B
103140612	-4.16008	0	LOC103140612	phospholemman-like
103136802	-4.11168	0	erf	ETS domain-containing transcription factor ERF isoform X2
103155844	-4.10081	0	LOC103155844	trafficking kinesin-binding protein 2 isoform X1
103135690	-3.9988	0	bag1	BAG family molecular chaperone regulator 1
103143150	-3.96987	0	LOC103143150	MAGUK p55 subfamily member 2 isoform X2
103132423	-3.94389	0	LOC103132423	matrin-3-like
103139162	-3.94035	0	LOC103139162	complement factor H-like isoform X6
103154823	-3.92166	0	LOC103154823	unconventional myosin-XV-like
103144940	-3.90995	0	LOC103144940	liprin-alpha-3-like isoform X3
103134626	-3.88244	0	LOC103134626	solute carrier family 2, facilitated glucose transporter member 1-like
103130786	-3.7627	0	mgat4b	alpha-1,3-mannosyl-glycoprotein 4-beta-N-acetylglucosaminyltransferase B
103135689	-3.7388	0	LOC103135689	myosin regulatory light polypeptide 9
103131011	-3.7234	0	LOC103131011	excitatory amino acid transporter 5-like isoform X2
103155497	-3.65214	0	LOC103155497	sacsin-like, partial
103144821	-3.51043	0	tbc1d9	TBC1 domain family member 9
103145591	-3.31088	0	sarm1	sterile alpha and TIR motif-containing protein 1
103146427	-3.28001	0	LOC103146427	CCR4-NOT transcription complex subunit 3-like
103130915	-3.25606	0	LOC103130915	zinc finger protein 281-like
103141046	-3.20258	0	psma2	proteasome subunit alpha type-2
103133584	-3.19779	0	cog2	conserved oligomeric Golgi complex subunit 2 isoform X1
103141631	-3.19049	0	gaa	lysosomal alpha-glucosidase
103136238	-3.16926	0	hrh1	histamine H1 receptor
103154126	-3.1466	0	dnpep	aspartyl aminopeptidase isoform X1
103130984	-3.14574	0	mcoln2	mucolipin-2 isoform X2
103156860	-3.10172	0	LOC103156860	calsequestrin-2-like
103133852	-3.10097	0	LOC103133852	flotillin-2a isoform X2
103130097	-3.05234	0	creg1	protein CREG1
103155541	-3.0486	0	LOC103155541	endoplasmic reticulum mannosyl-oligosaccharide 1,2-alpha-mannosidase-like isoform X1
103139359	-3.03022	0	LOC103139359	ADP-ribosylation factor-like protein 6 isoform X1
103142405	-3.0026	0	sdhaf3	succinate dehydrogenase assembly factor 3, mitochondrial
103137201	-2.99375	0	tie1	tyrosine-protein kinase receptor Tie-1 isoform X2
103139230	-2.88677	0	LOC103139230	oocyte zinc finger protein XlCOF6
103142416	-2.83225	0	rarb	retinoic acid receptor beta isoform X1
103130725	-2.76393	0	sh3bp2	SH3 domain-binding protein 2 isoform X1
103143117	-2.7065	0	LOC103143117	cytohesin-3
103155965	-2.70371	0	LOC103155965	protein NipSnap homolog 3B-like
103150938	-2.65919	0	dnajc27	dnaJ homolog subfamily C member 27 isoform X1
103142710	-2.58614	0	scarb2	lysosome membrane protein 2 isoform X1
103142394	-2.57348	0	thrb	thyroid hormone receptor beta isoform X4
103142050	-2.56183	0	LOC103142050	collagen alpha-1(XXVII) chain B-like
103134552	-2.49559	0	smarcd1	SWI/SNF-related matrix-associated actin-dependent regulator of chromatin subfamily D member 1
103129806	-2.4508	0	stoml2	stomatin-like protein 2, mitochondrial
103135693	-2.39399	0	atp6v1h	V-type proton ATPase subunit H isoform X2
103142437	-2.38154	0	ciapin1	anamorsin isoform X1
103141504	-2.31835	0	agpat3	1-acyl-sn-glycerol-3-phosphate acyltransferase gamma isoform X2
103156169	-2.30258	0	scfd1	sec1 family domain-containing protein 1
103138842	-2.24199	0	klhdc4	kelch domain-containing protein 4
103135691	-2.23549	0	chmp5	charged multivesicular body protein 5
103140983	-2.23021	0	LOC103140983	ubiquitin carboxyl-terminal hydrolase 22 isoform X2
103141662	-2.21499	0	tom1l2	TOM1-like protein 2 isoform X1
103130991	-2.20847	0	LOC103130991	chloride channel CLIC-like protein 1
103147660	-2.2004	0	stat2	signal transducer and activator of transcription 2
103146150	-2.18576	0	dut	deoxyuridine 5\'-triphosphate nucleotidohydrolase, mitochondrial
103140512	-2.11392	0	LOC103140512	cadherin-18-like isoform X1
103130700	-2.07626	0	LOC103130700	alpha-1,3-mannosyl-glycoprotein 2-beta-N-acetylglucosaminyltransferase-like
103134247	-2.04536	0	LOC103134247	protocadherin-8-like
103135895	-2.03724	0	LOC103135895	torsin-1A-like isoform X2
103136649	-2.03313	0	LOC103136649	R-spondin-3-like
103147069	-2.00413	0	stxbp4	syntaxin-binding protein 4 isoform X3
103132697	-1.9992	0	LOC103132697	CD276 antigen homolog
103148248	-1.99814	0	bag3	BAG family molecular chaperone regulator 3
103139618	-1.94445	0	smg6	telomerase-binding protein EST1A isoform X3
103140269	-1.93902	0	LOC103140269	UPF0577 protein KIAA1324-like
103149485	-1.91747	0	s100b	protein S100-B
103135056	-1.89549	0	snrnp40	U5 small nuclear ribonucleoprotein 40 kDa protein
103143030	-1.78815	0	LOC103143030	dipeptidyl aminopeptidase-like protein 6 isoform X3
103138102	-1.75096	0	lpcat2	lysophosphatidylcholine acyltransferase 2
103130576	-1.67903	0	fgfr1op	FGFR1 oncogene partner isoform X2
103149410	-1.66741	0	LOC103149410	cytochrome P450 20A1
103140871	-1.6668	0	nr4a3	nuclear receptor subfamily 4 group A member 3 isoform X3
103142414	-1.63378	0	LOC103142414	receptor-type tyrosine-protein phosphatase U-like, partial
103148491	-1.63082	0	LOC103148491	elongation factor 1-alpha 1
103143751	-1.4995	0	LOC103143751	dedicator of cytokinesis protein 7-like isoform X1
103149050	-1.495	0	npy2r	neuropeptide Y receptor type 2
103130045	-1.43797	0	eif5a2	eukaryotic translation initiation factor 5A-2
103143522	-1.34914	0	rbm26	RNA-binding protein 26
103136333	-1.33653	0	sptssb	serine palmitoyltransferase small subunit B
103135166	-1.26618	0	LOC103135166	ribonucleoside-diphosphate reductase subunit M2 B-like
103131472	-1.23096	0	LOC103131472	MAM domain-containing glycosylphosphatidylinositol anchor protein 2-like isoform X1
103154515	-1.22465	0	ssna1	Sjoegren syndrome nuclear autoantigen 1
103134126	-1.19861	0	pde10a	cAMP and cAMP-inhibited cGMP 3\',5\'-cyclic phosphodiesterase 10A isoform X1
103141298	-1.15396	0	eps8l2	epidermal growth factor receptor kinase substrate 8-like protein 2 isoform X1
103140003	-1.13946	0	LOC103140003	flocculation protein FLO11-like
103136015	-1.08537	0	LOC103136015	protein phosphatase 1 regulatory subunit 1A
103139106	-1.01069	0	LOC103139106	ubiquitin-conjugating enzyme E2 variant 1
103142357	-0.950349	0	LOC103142357	palmitoyltransferase ZDHHC18-like isoform X1
103153022	-0.912088	0	LOC103153022	protein ABHD8-like isoform X2
103150070	-0.905332	0	LOC103150070	neurofilament light polypeptide-like
103133512	-0.887335	0	LOC103133512	synaptotagmin-14-like
103135776	-0.883696	0	ube2v2	ubiquitin-conjugating enzyme E2 variant 2
103155388	-0.864193	0	elmod1	ELMO domain-containing protein 1
103151281	-0.85063	0	zdhhc17	palmitoyltransferase ZDHHC17
103155144	-0.811923	0	LOC103155144	protein prune homolog 2-like isoform X1
103130309	-0.811076	0	aass	alpha-aminoadipic semialdehyde synthase, mitochondrial
103147108	-0.77499	0	jam2	junctional adhesion molecule B isoform X4
103130433	-0.751434	0	hsp90b1	endoplasmin
103141267	-0.658474	0	map2k1	dual specificity mitogen-activated protein kinase kinase 1
103153441	-0.589702	0	fscn1	fascin
103149224	-0.579431	0	LOC103149224	cyclin-dependent kinase 5 activator 1-like
103134414	-0.560648	0	cnot4	CCR4-NOT transcription complex subunit 4
103144698	-0.547143	0	LOC103144698	visinin-like protein 1
103145166	-0.516594	0	rnf157	RING finger protein 157 isoform X1
103138895	-0.464842	0	LOC103138895	LOW QUALITY PROTEIN: guanine nucleotide-binding protein G(o) subunit alpha-like
103130283	-0.300372	0	hspa8	heat shock cognate 71 kDa protein
103147507	0.304701	0	eef1g	elongation factor 1-gamma
103142066	0.335946	0	LOC103142066	14-3-3 protein gamma-1
103135787	0.341694	0	LOC103135787	serine/arginine-rich splicing factor 11-like isoform X1
103149686	0.341952	0	LOC103149686	visinin-like protein 1
103143238	0.384336	0	LOC103143238	14-3-3 protein beta/alpha-1-like
103144241	0.461798	0	ywhaq	14-3-3 protein theta
103145103	0.463704	0	LOC103145103	synapsin-2-like
103151487	0.501563	0	magi1	membrane-associated guanylate kinase, WW and PDZ domain-containing protein 1 isoform X6
103155239	0.516641	0	LOC103155239	semaphorin-7A-like
103136733	0.52646	0	LOC103136733	C-type natriuretic peptide 1-like
103147849	0.547479	0	LOC103147849	isocitrate dehydrogenase
103141206	0.557297	0	LOC103141206	low-density lipoprotein receptor-related protein 1-like isoform X1
103138711	0.612716	0	ktn1	kinectin isoform X5
103143773	0.620543	0	cdip1	cell death-inducing p53-target protein 1 isoform X1
103134950	0.624609	0	nos1	nitric oxide synthase, brain isoform X1
103130319	0.627872	0	vps35	vacuolar protein sorting-associated protein 35, partial
103130050	0.631923	0	eif2s3	eukaryotic translation initiation factor 2 subunit 3
103135103	0.636794	0	azin1b	antizyme inhibitor 1b
103147183	0.638498	0	LOC103147183	cysteine/serine-rich nuclear protein 3-like isoform X2
103137410	0.647616	0	LOC103137410	SLIT-ROBO Rho GTPase-activating protein 3-like isoform X4
103141622	0.664748	0	LOC103141622	protein kinase C alpha type isoform X2
103136338	0.674406	0	kpna4	importin subunit alpha-3
103145537	0.678858	0	LOC103145537	protein FAM219A
103140527	0.710613	0	cnksr2	connector enhancer of kinase suppressor of ras 2 isoform X2
103136054	0.710816	0	kbtbd11	kelch repeat and BTB domain-containing protein 11
103140295	0.711286	0	ankrd10	ankyrin repeat domain-containing protein 10
103145189	0.75748	0	LOC103145189	uncharacterized protein LOC103145189 isoform X1
103141750	0.768551	0	LOC103141750	voltage-gated potassium channel subunit beta-2-like isoform X2
103146337	0.77455	0	rheb	GTP-binding protein Rheb
103155113	0.786835	0	LOC103155113	small ubiquitin-related modifier 3
103135218	0.793232	0	2020-03-06	E3 ubiquitin-protein ligase MARCH6
103134617	0.798622	0	rps10	40S ribosomal protein S10
103153542	0.813397	0	cirbp	cold-inducible RNA-binding protein isoform X3
103140316	0.836251	0	mpc2	mitochondrial pyruvate carrier 2
103146823	0.837446	0	LOC103146823	LOW QUALITY PROTEIN: AT-rich interactive domain-containing protein 1B-like
103153844	0.837599	0	LOC103153844	protein transport protein Sec23A isoform X1
103130261	0.860095	0	sympk	symplekin
103154830	0.861427	0	gjd2	gap junction delta-2 protein
103155031	0.895769	0	hadhb	trifunctional enzyme subunit beta, mitochondrial isoform X2
103144512	0.912355	0	gprin1	G protein-regulated inducer of neurite outgrowth 1 isoform X2
103156827	0.924836	0	LOC103156827	carnitine O-palmitoyltransferase 1, liver isoform-like isoform X2
103155242	0.941122	0	sox2	transcription factor SOX-2
103151527	0.976579	0	rbm17	splicing factor 45 isoform X2
103153872	0.985719	0	map1lc3a	microtubule-associated proteins 1A/1B light chain 3A
103134659	1.00798	0	igsf21	immunoglobulin superfamily member 21
103149794	1.0941	0	LOC103149794	titin-like
103142865	1.10665	0	svop	synaptic vesicle 2-related protein
103129216	1.11874	0	phkb	phosphorylase b kinase regulatory subunit beta isoform X2
103138681	1.12046	0	sec63	translocation protein SEC63 homolog isoform X1
103145074	1.14346	0	LOC103145074	cytochrome c oxidase subunit 7C, mitochondrial
103137187	1.14416	0	LOC103137187	glypican-1-like
103142033	1.14645	0	psat1	phosphoserine aminotransferase
103154763	1.19184	0	nars	asparagine--tRNA ligase, cytoplasmic isoform X1
103155425	1.21587	0	stard3nl	MLN64 N-terminal domain homolog
103148618	1.22535	0	LOC103148618	CD59 glycoprotein-like
103152374	1.28753	0	LOC103152374	eukaryotic translation initiation factor 3 subunit C
103136984	1.28845	0	vps13b	vacuolar protein sorting-associated protein 13B isoform X1
103139723	1.31247	0	ythdf3	YTH domain-containing family protein 3
103151536	1.34179	0	phyh	phytanoyl-CoA dioxygenase, peroxisomal
103147458	1.35758	0	LOC103147458	serine/threonine-protein phosphatase 2A 55 kDa regulatory subunit B gamma isoform isoform X2
103136519	1.40294	0	kif1bp	KIF1-binding protein
103138333	1.43078	0	cep295	centrosomal protein of 295 kDa
103144333	1.43608	0	LOC103144333	uncharacterized protein LOC103144333 isoform X1
103135662	1.46063	0	shmt2	serine hydroxymethyltransferase, mitochondrial
103136491	1.47313	0	ccsap	centriole, cilia and spindle-associated protein
103156452	1.47367	0	wdr17	WD repeat-containing protein 17 isoform X1
103152329	1.48375	0	LOC103152329	uncharacterized protein LOC103152329 isoform X1
103142679	1.48948	0	vps33b	vacuolar protein sorting-associated protein 33B
103134165	1.49805	0	macrod2	O-acetyl-ADP-ribose deacetylase MACROD2
103141932	1.50972	0	fkbp15	FK506-binding protein 15 isoform X4
103149878	1.56215	0	frmd5	FERM domain-containing protein 5
103140938	1.62473	0	LOC103140938	BTB/POZ domain-containing protein 17-like
103130892	1.65314	0	hsd17b10	3-hydroxyacyl-CoA dehydrogenase type-2
103148583	1.65524	0	rabggtb	geranylgeranyl transferase type-2 subunit beta
103138770	1.68814	0	clmn	calmin isoform X2
103135484	1.689	0	LOC103135484	ubiquitin-conjugating enzyme E2 K-like
103138148	1.7239	0	LOC103138148	tissue factor pathway inhibitor-like isoform X1
103156142	1.75098	0	lamc1	laminin subunit gamma-1
103140448	1.75642	0	LOC103140448	homeobox protein AKR-like
103130044	1.7807	0	rpl22l1	60S ribosomal protein L22-like 1
103129325	1.78387	0	vwc2l	von Willebrand factor C domain-containing protein 2-like
103137641	1.80338	0	ptk7	inactive tyrosine-protein kinase 7
103151060	1.81915	0	LOC103151060	guanine nucleotide-binding protein G(k) subunit alpha-like isoform X1
107838360	1.85132	0	apln	apelin
103155108	1.86017	0	wdr24	WD repeat-containing protein 24
103153866	1.90298	0	LOC103153866	ubiquinol-cytochrome-c reductase complex assembly factor 1
103156001	1.92605	0	tmeff1	tomoregulin-1
103152942	1.93523	0	LOC103152942	uncharacterized protein LOC103152942
103151259	1.97888	0	nphp4	nephrocystin-4 isoform X2
103145945	2.04893	0	LOC103145945	C-X-C motif chemokine 5-like isoform X1
103142483	2.05647	0	LOC103142483	alpha-parvin isoform X2
103140231	2.06743	0	LOC103140231	muscarinic acetylcholine receptor M2
103156513	2.10365	0	LOC103156513	anoctamin-9-like
103155116	2.12516	0	LOC103155116	dyslexia-associated protein KIAA0319 homolog isoform X6
103140795	2.16649	0	krtcap2	keratinocyte-associated protein 2
103154476	2.1778	0	ltv1	protein LTV1 homolog isoform X2
103153461	2.18088	0	LOC103153461	NAD(P)H dehydrogenase
103144973	2.21579	0	LOC103144973	coronin-1A-like
103145425	2.23915	0	xpo6	exportin-6
103138173	2.2396	0	LOC103138173	fas apoptotic inhibitory molecule 1-like
103153909	2.24697	0	LOC103153909	poly
103136545	2.25627	0	LOC103136545	synaptotagmin-9-like
103134777	2.28012	0	sestd1	SEC14 domain and spectrin repeat-containing protein 1
103134372	2.30825	0	tbr1	T-box brain protein 1
103142317	2.33771	0	comtd1	catechol O-methyltransferase domain-containing protein 1 isoform X2
103134604	2.35365	0	LOC103134604	cysteine and glycine-rich protein 1-like
103155603	2.39515	0	LOC103155603	protein EFR3 homolog B-like isoform X1
103129434	2.48389	0	fars2	phenylalanine--tRNA ligase, mitochondrial
103148208	2.49114	0	LOC103148208	lysosome membrane protein 2-like
103155695	2.50838	0	LOC103155695	disintegrin and metalloproteinase domain-containing protein 10-like
103156857	2.53004	0	timmdc1	complex I assembly factor TIMMDC1, mitochondrial
103151240	2.59135	0	LOC103151240	relaxin-3 receptor 1-like
103150365	2.62187	0	LOC103150365	MAGUK p55 subfamily member 6-like
103137483	2.635	0	hgfac	hepatocyte growth factor activator
103136651	2.65403	0	rps9	40S ribosomal protein S9
103153895	2.75826	0	LOC103153895	uncharacterized protein C2orf47 homolog, mitochondrial-like
103144034	2.76422	0	narf	nuclear prelamin A recognition factor
103155165	2.79341	0	LOC103155165	ras-related protein Rab-11B-like
103145921	2.82565	0	LOC103145921	calpain-1 catalytic subunit-like isoform X1
103130064	2.85926	0	pnpla4	patatin-like phospholipase domain-containing protein 4 isoform X1
103153448	2.88094	0	kmt5b	histone-lysine N-methyltransferase KMT5B
103131934	2.96412	0	brcc3	lys-63-specific deubiquitinase BRCC36
103144554	2.99136	0	LOC103144554	transmembrane protein 230-like
103137988	3.02258	0	LOC103137988	kin of IRRE-like protein 1 isoform X2
103130974	3.02782	0	LOC103130974	CDK5 and ABL1 enzyme substrate 2-like
103151145	3.04162	0	LOC103151145	DIS3-like exonuclease 1
103156854	3.04376	0	LOC103156854	multidrug resistance-associated protein 4-like
103136739	3.06714	0	tnfrsf1a	tumor necrosis factor receptor superfamily member 1A
103131304	3.19909	0	derl2	derlin-2
103154987	3.26261	0	LOC103154987	exostosin-1c isoform X1
103136514	3.30239	0	LOC103136514	hexokinase-1-like isoform X1
103150264	3.31373	0	LOC103150264	lipoma HMGIC fusion partner-like 3 protein
103149605	3.33361	0	mov10	putative helicase MOV-10 isoform X2
103137492	3.35951	0	plscr3	phospholipid scramblase 3
103132707	3.36913	0	LOC103132707	neuronal acetylcholine receptor subunit alpha-5-like
103150384	3.43611	0	cpvl	probable serine carboxypeptidase CPVL
103130066	3.45581	0	LOC103130066	protein SON isoform X1
103149753	3.47027	0	ring1	E3 ubiquitin-protein ligase RING1 isoform X2
103144019	3.49763	0	hexdc	hexosaminidase D isoform X1
103135676	3.53803	0	LOC103135676	macrophage mannose receptor 1-like isoform X1
103131393	3.5674	0	LOC103131393	calcium-transporting ATPase type 2C member 1-like isoform X3
103136744	3.56773	0	tapbpl	tapasin-related protein
103149769	3.57574	0	LOC103149769	tenascin-like isoform X3
103131394	3.58147	0	pik3r4	phosphoinositide 3-kinase regulatory subunit 4 isoform X1
103141280	3.59534	0	ddb2	DNA damage-binding protein 2 isoform X2
103143467	3.6421	0	LOC103143467	Na(+)/H(+) exchanger beta-like
103147744	3.67029	0	LOC103147744	uncharacterized protein LOC103147744
103150251	3.67483	0	nat10	RNA cytidine acetyltransferase
103155217	3.69339	0	psmd13	26S proteasome non-ATPase regulatory subunit 13
103142470	3.72178	0	pyurf	protein preY, mitochondrial
103142300	3.76371	0	lrrc20	leucine-rich repeat-containing protein 20
103156199	3.79053	0	LOC103156199	double-stranded RNA-specific editase 1-like
103130052	3.82686	0	apoo	MICOS complex subunit MIC26
103147390	3.82794	0	LOC103147390	extracellular serine/threonine protein kinase FAM20C-like isoform X1
103156308	3.94167	0	LOC103156308	noelin-like isoform X1
103143488	4.02181	0	LOC103143488	protein argonaute-3-like isoform X1
103129409	4.1692	0	phtf2	putative homeodomain transcription factor 2 isoform X1
103142631	4.19615	0	zdhhc13	palmitoyltransferase ZDHHC13 isoform X3
103151135	4.26782	0	LOC103151135	golgin subfamily B member 1-like isoform X3
103147958	4.27968	0	LOC103147958	uncharacterized protein LOC103147958
103131392	4.29982	0	slc39a1	zinc transporter ZIP1
103134779	4.31255	0	dnajc15	dnaJ homolog subfamily C member 15
103142626	4.35982	0	nav2	neuron navigator 2 isoform X4
103143437	4.4128	0	LOC103143437	glycogen synthase kinase-3 beta-like isoform X1
103129745	4.42389	0	katnbl1	KATNB1-like protein 1 isoform X1
103132345	4.43099	0	gpatch1	G patch domain-containing protein 1
103147725	4.4925	0	LOC103147725	redox-regulatory protein FAM213A-like isoform X1
103131721	4.51245	0	LOC103131721	ras GTPase-activating-like protein IQGAP1
103140197	4.53212	0	lamtor4	ragulator complex protein LAMTOR4
103146513	4.57203	0	LOC103146513	adiponectin receptor protein 2
103142973	4.73624	0	iqgap2	ras GTPase-activating-like protein IQGAP2
103146384	4.74902	0	LOC103146384	carboxy-terminal kinesin 2
103143508	4.82656	0	LOC103143508	LOW QUALITY PROTEIN: uncharacterized protein LOC103143508
103140302	4.88296	0	piga	phosphatidylinositol N-acetylglucosaminyltransferase subunit A
103135880	4.96963	0	LOC103135880	proline-rich protein 13-like
103140598	5.2816	0	LOC103140598	RNA-binding protein 4B-like
103131710	5.29072	0	LOC103131710	membrane primary amine oxidase-like, partial
103142639	5.38547	0	LOC103142639	very-long-chain (3R)-3-hydroxyacyl-CoA dehydratase-like
103149215	5.43231	0	LOC103149215	serine/threonine-protein kinase BRSK2-like isoform X4
103154999	5.43345	0	LOC103154999	uncharacterized protein LOC103154999 isoform X2
103143485	5.44065	0	LOC103143485	hormone-sensitive lipase-like
103156670	5.47685	0	LOC103156670	UDP-glucuronosyltransferase 2B31-like
103145475	5.68318	0	LOC103145475	interleukin-12 receptor subunit beta-2-like
103149700	5.71735	0	LOC103149700	CD151 antigen-like
103131711	5.77164	0	LOC103131711	primary amine oxidase, liver isozyme-like
103129410	5.9235	0	LOC103129410	EMILIN-1-like
103156969	5.92786	0	LOC103156969	intermediate filament protein ON3-like
103142645	5.93354	0	ero1a	ERO1-like protein alpha
103140305	6.00948	0	xk	membrane transport protein XK
103129407	6.03814	0	LOC103129407	isocitrate dehydrogenase
103146592	6.13681	0	pop7	ribonuclease P protein subunit p20
103129308	6.15089	0	LOC103129308	leucine zipper protein 2-like
103151154	6.24641	0	shank2	SH3 and multiple ankyrin repeat domains protein 2
103143479	6.51855	0	LOC103143479	uncharacterized protein LOC103143479
103131652	6.59504	0	LOC103131652	sodium/hydrogen exchanger 5-like, partial
103156436	6.75516	0	LOC103156436	docking protein 2-like isoform X1
103142686	7.02952	0	crtc3	CREB-regulated transcription coactivator 3 isoform X4
103130053	7.15046	0	sat1	diamine acetyltransferase 1
103142632	7.22732	0	LOC103142632	metallophosphoesterase MPPED2
103151435	7.26787	0	rexo4	RNA exonuclease 4
103143511	7.32438	0	hivep1	zinc finger protein 40
103149752	7.41469	0	rps18	40S ribosomal protein S18
103142621	7.46124	0	nell1	protein kinase C-binding protein NELL1
103143436	7.61738	0	LOC103143436	protein capicua homolog isoform X3
103156894	7.72618	0	LOC103156894	CCAAT/enhancer-binding protein gamma
103146570	7.88086	0	LOC103146570	testicular haploid expressed gene protein isoform X4
103130405	8.12412	0	LOC103130405	fibrocystin-L-like, partial
103129420	8.19633	0	anxa2	annexin A2
103143442	8.27465	0	LOC103143442	E3 ubiquitin-protein ligase RNF19B
103129819	8.38586	0	mafa	transcription factor MafA
103153580	8.45299	0	ttc17	tetratricopeptide repeat protein 17 isoform X1
103146512	8.80643	0	LOC103146512	protein Wnt-5b isoform X1
103132346	8.98804	0	wdr88	WD repeat-containing protein 88
103142683	8.99411	0	LOC103142683	THAP domain-containing protein 6-like
103154980	8.99717	0	cdca5	sororin
103142646	9.01119	0	samd4a	protein Smaug homolog 1
103153579	9.1699	0	trpm5	transient receptor potential cation channel subfamily M member 5
103142674	9.17368	0	c1qtnf4	complement C1q tumor necrosis factor-related protein 4
103143513	9.18247	0	tekt2	tektin-2
103149874	9.20705	0	LOC103149874	retinol dehydrogenase 13-like
103155601	9.23781	0	LOC103155601	protein NLRC3-like
103143475	9.30123	0	LOC103143475	cyclin-dependent kinase 5 activator 1-like
103143499	9.30166	0	LOC103143499	claudin-4-like
103149706	9.34084	0	bbox1	gamma-butyrobetaine dioxygenase
103130011	9.36142	0	LOC103130011	nuclear factor of activated T-cells, cytoplasmic 1-like isoform X2
103136586	9.39033	0	LOC103136586	growth arrest-specific protein 8-like
103143483	9.417	0	LOC103143483	mitochondrial import receptor subunit TOM40 homolog isoform X1
103143497	9.47391	0	LOC103143497	angiopoietin-1-like
103153823	9.47632	0	qrsl1	glutamyl-tRNA(Gln) amidotransferase subunit A, mitochondrial
103142647	9.51378	0	gch1	GTP cyclohydrolase 1
103155321	9.52345	0	LOC103155321	39S ribosomal protein L49, mitochondrial-like
103155224	9.61855	0	LOC103155224	aggrecan core protein-like isoform X2
103156812	9.62318	0	LOC103156812	actin-related protein 2/3 complex subunit 1A-like isoform X1
103140595	9.66606	0	LOC103140595	phosphatidylinositol 3,4,5-trisphosphate 3-phosphatase TPTE2-like isoform X2
103156613	9.70306	0	med31	mediator of RNA polymerase II transcription subunit 31
103153588	9.71165	0	slc35c1	GDP-fucose transporter 1 isoform X1
103130391	9.7331	0	xkr8	XK-related protein 8 isoform X2
103142677	9.74114	0	prc1	protein regulator of cytokinesis 1 isoform X3
103156809	9.75396	0	LOC103156809	transient receptor potential cation channel subfamily M member 5-like isoform X3
103143456	9.75819	0	LOC103143456	kelch-like protein 31
103154978	9.765	0	ncdn	neurochondrin
103143500	9.83513	0	LOC103143500	uncharacterized protein C1orf109 homolog isoform X1
103152226	9.83916	0	cutc	copper homeostasis protein cutC homolog isoform X1
103142654	9.85105	0	LOC103142654	troponin T, fast skeletal muscle isoforms-like
103156198	9.87026	0	cep70	centrosomal protein of 70 kDa isoform X6
103156200	9.90911	0	fam207a	protein FAM207A
103143498	9.98962	0	tpmt	thiopurine S-methyltransferase
103153449	10.0455	0	pole3	DNA polymerase epsilon subunit 3 isoform X1
103143454	10.0579	0	pithd1	PITH domain-containing protein 1
103154989	10.0814	0	LOC103154989	mediator of RNA polymerase II transcription subunit 30-like
103130585	10.0881	0	donson	protein downstream neighbor of Son
103153578	10.0883	0	traf6	TNF receptor-associated factor 6
103143464	10.1272	0	LOC103143464	C-Myc-binding protein-like
103149703	10.1811	0	arl14ep	ARL14 effector protein
103151129	10.2179	0	pex16	peroxisomal biogenesis factor 16
103142622	10.2361	0	slc6a5	sodium- and chloride-dependent glycine transporter 2 isoform X2
103151123	10.2921	0	tipin	TIMELESS-interacting protein isoform X1
103147727	10.3638	0	LOC103147727	leucine zipper putative tumor suppressor 2 homolog
103131810	10.4427	0	LOC103131810	CKLF-like MARVEL transmembrane domain-containing protein 6, partial
103131603	10.465	0	rfc4	replication factor C subunit 4
103130563	10.5648	0	snrnp70	U1 small nuclear ribonucleoprotein 70 kDa
103143476	10.5825	0	tmem170b	transmembrane protein 170B
103131153	10.6167	0	LOC103131153	uncharacterized protein LOC103131153
103153583	10.6189	0	apip	methylthioribulose-1-phosphate dehydratase isoform X1
103131539	10.6821	0	vps13c	vacuolar protein sorting-associated protein 13C
103131538	10.7152	0	LOC103131538	vacuolar protein sorting-associated protein 13C-like
103156914	10.7344	0	LOC103156914	vacuolar protein sorting-associated protein 13C-like
103141198	10.7427	0	smc5	structural maintenance of chromosomes protein 5 isoform X1
103154998	10.8188	0	tfap2e	LOW QUALITY PROTEIN: transcription factor AP-2-epsilon
103133660	10.854	0	cib1	calcium and integrin-binding protein 1
103147396	10.8583	0	ccdc97	coiled-coil domain-containing protein 97 isoform X1
103147086	10.9109	0	LOC103147086	phytanoyl-CoA hydroxylase-interacting protein-like isoform X2
103131648	10.934	0	LOC103131648	puratrophin-1-like isoform X1
103129559	10.9414	0	LOC103129559	muscarinic acetylcholine receptor M5-like
103143449	10.9447	0	LOC103143449	zinc finger MYM-type protein 4 isoform X2
103154985	11.0193	0	clspn	claspin isoform X2
103147391	11.0197	0	LOC103147391	nuclear body protein SP140-like isoform X3
103132332	11.024	0	LOC103132332	FH1/FH2 domain-containing protein 1
103134249	11.0487	0	LOC103134249	SLIT and NTRK-like protein 5
103130006	11.069	0	LOC103130006	uncharacterized protein LOC103130006
103142640	11.1071	0	LOC103142640	sodium/potassium/calcium exchanger 1-like isoform X1
103129140	11.1206	0	LOC103129140	corticosteroid 11-beta-dehydrogenase isozyme 2-like
103156893	11.1679	0	cebpa	CCAAT/enhancer-binding protein alpha
103129418	11.1821	0	gtf2a2	transcription initiation factor IIA subunit 2
103130829	11.2205	0	efl1	elongation factor-like GTPase 1 isoform X1
103129412	11.2278	0	gpn1	GPN-loop GTPase 1 isoform X1
103130388	11.3263	0	smim13	small integral membrane protein 13
103147393	11.3493	0	LOC103147393	uncharacterized protein LOC103147393
103143491	11.3735	0	naxe	NAD(P)H-hydrate epimerase
103129408	11.3791	0	cog8	conserved oligomeric Golgi complex subunit 8
103129307	11.3831	0	LOC103129307	leucine-rich repeat and immunoglobulin-like domain-containing nogo receptor-interacting protein 1-B
103154976	11.4045	0	ppt1	palmitoyl-protein thioesterase 1
103136742	11.423	0	mrpl51	39S ribosomal protein L51, mitochondrial
103131519	11.4264	0	nudcd1	nudC domain-containing protein 1 isoform X1
103131515	11.4419	0	LOC103131515	eukaryotic translation initiation factor 3 subunit E-B
103150978	11.4761	0	LOC103150978	synaptotagmin-6 isoform X1
103155221	11.4909	0	LOC103155221	cadherin-related family member 5-like
103142652	11.5001	0	LOC103142652	gamma-secretase subunit Aph-1b
103129415	11.5332	0	LOC103129415	uncharacterized protein LOC103129415 isoform X1
103131517	11.5451	0	LOC103131517	thyrotropin-releasing hormone receptor-like
103142641	11.5532	0	LOC103142641	C-myc promoter-binding protein-like isoform X7
103142700	11.5925	0	iqgap1	ras GTPase-activating-like protein IQGAP1
103140308	11.6714	0	dynlt3	dynein light chain Tctex-type 3
103149704	11.6733	0	nr1h3	oxysterols receptor LXR-alpha
103155068	11.6932	0	nlgn4x	neuroligin-4, X-linked
103144482	11.7053	0	LOC103144482	protein S100-A1-like
103150261	11.7892	0	LOC103150261	tripartite motif-containing protein 14-like
103151130	11.8294	0	arfgap2	ADP-ribosylation factor GTPase-activating protein 2 isoform X2
103130393	11.842	0	msto1	protein misato homolog 1
103143494	11.9434	0	LOC103143494	zinc finger and BTB domain-containing protein 22-like
103131647	12.0015	0	LOC103131647	ras-related protein Rab-8B
103131722	12.011	0	LOC103131722	cocaine- and amphetamine-regulated transcript protein-like
103137511	12.04	0	LOC103137511	vigilin-like
103156205	12.0789	0	LOC103156205	calcipressin-1-like
103142633	12.0823	0	LOC103142633	immunoglobulin superfamily containing leucine-rich repeat protein 2-like
103130010	12.1191	0	LOC103130010	sal-like protein 3 isoform X1
103153455	12.1567	0	LOC103153455	gamma-aminobutyric acid receptor-associated protein-like 2
103153589	12.1706	0	chst1	carbohydrate sulfotransferase 1
103131730	12.1831	0	LOC103131730	glycosyltransferase-like protein LARGE2
103131651	12.1833	0	kifc3	kinesin-like protein KIFC3 isoform X5
103143469	12.2168	0	kdm1b	lysine-specific histone demethylase 1B
103130005	12.2652	0	fbxl6	F-box/LRR-repeat protein 6
103142320	12.2722	0	samd8	sphingomyelin synthase-related protein 1
103143439	12.2872	0	LOC103143439	zinc finger protein 706-like
103154979	12.3482	0	psmb2	proteasome subunit beta type-2
103131161	12.3654	0	LOC103131161	ras-related protein Rab-11A
103153581	12.4118	0	hsd17b12	very-long-chain 3-oxoacyl-CoA reductase
103148982	12.419	0	LOC103148982	G-protein coupled receptor 20-like
103154971	12.443	0	meaf6	chromatin modification-related protein MEAF6 isoform X2
103129411	12.5096	0	LOC103129411	stathmin-4-like
103143455	12.5162	0	tceb3	transcription elongation factor B polypeptide 3 isoform X1
103130145	12.5606	0	LOC103130145	secretory carrier-associated membrane protein 5
103131649	12.5622	0	katnb1	katanin p80 WD40 repeat-containing subunit B1
103143471	12.6106	0	LOC103143471	nucleolin 2-like
103142660	12.6942	0	atp6v0d1	V-type proton ATPase subunit d 1
103142642	12.7757	0	LOC103142642	Golgi apparatus protein 1-like isoform X1
103144193	12.8041	0	mapk8ip1	C-Jun-amino-terminal kinase-interacting protein 1
103136743	12.8631	0	vamp1	vesicle-associated membrane protein 1
103143493	12.9799	0	LOC103143493	sodium channel subunit beta-1-like isoform X2
103155213	13.0128	0	LOC103155213	casein kinase II subunit alpha\'-like
103143465	13.0255	0	srsf10	serine/arginine-rich splicing factor 10 isoform X3
103143468	13.0309	0	cfap69	cilia- and flagella-associated protein 69 isoform X2
103131158	13.169	0	herc1	probable E3 ubiquitin-protein ligase HERC1 isoform X13
103154963	13.2104	0	LOC103154963	eyes absent homolog 3-like isoform X1
103142319	13.2981	0	LOC103142319	voltage-dependent anion-selective channel protein 2
103155220	14.046	0	LOC103155220	cathepsin D
103141681	15.2637	0	LOC103141681	ADP/ATP translocase 3
103151031	-5.1532	5.59203	ddx55	ATP-dependent RNA helicase DDX55
103155985	-4.25474	1.53596	maea	macrophage erythroblast attacher isoform X2
103130785	-2.58165	1.42109	LOC103130785	LOW QUALITY PROTEIN: mastermind-like protein 1
103151032	-2.50548	10.8173	eif2b1	translation initiation factor eIF-2B subunit alpha isoform X1
103135683	0.842485	-10.6157	r3hdm2	R3H domain-containing protein 2 isoform X2
103130152	0.912807	-0.50306	LOC103130152	neuroplastin-like isoform X1
103154986	0.954548	-1.17743	LOC103154986	protein argonaute-4 isoform X1
103156580	1.41833	-1.06027	LOC103156580	diacylglycerol kinase eta isoform X1
103143431	1.49921	-1.14469	LOC103143431	nectin-2-like isoform X2
103129463	1.53357	-3.0215	LOC103129463	sorting nexin-9-like
103146740	2.1459	-2.86757	smpdl3a	acid sphingomyelinase-like phosphodiesterase 3a
103156607	2.50531	-4.83331	LOC103156607	chromatin complexes subunit BAP18 isoform X1
103143452	2.51522	-1.34539	LOC103143452	non-POU domain-containing octamer-binding protein isoform X2
103138614	2.69748	-4.41829	LOC103138614	potassium voltage-gated channel subfamily H member 5-like
103130395	2.9548	-1.3495	dpy19l4	probable C-mannosyltransferase DPY19L4 isoform X1
103142971	4.04593	-3.96775	f2r	proteinase-activated receptor 1
103155227	7.5049	-3.24087	LOC103155227	microtubule-associated protein 1A isoform X1
103147233	9.93442	-1.45241	LOC103147233	cytochrome b561
103129414	10.8925	-4.46989	LOC103129414	interleukin-17F-like
103154107	11.4029	-9.76518	sumo1	small ubiquitin-related modifier 1
103129416	11.4137	-1.69935	LOC103129416	zinc finger protein 395-like isoform X1
103156614	11.6831	-12.181	slc13a5	solute carrier family 13 member 5
