# Supplementary material for: Fixation of allelic gene expression landscapes and expression bias pattern shape the transcriptome of the clonal Amazon molly
Source: HighWire-hosted journal article supplement (doi:10.1101/gr.268870.120), 2021-02-05
Supplement: Supplemental_Table_S5.xlsx [file Supplemental_Table_S5.xlsx]

## Sheet: Supplment Table 7.csv
Supplemental Table S5.Genes exhibiting different allelic expression bias between P. formosa and interspecies hybrid in liver
geneID	clonal allelic expression pattern (log p.lat/p.mex)	F1 allelic expression pattern (log p.lat/p.mex)	Locus	Protein.name
103150177	0	-11.5943	tspan6	tetraspanin-6
103151374	0	-11.5009	LOC103151374	venom prothrombin activator omicarin-C non-catalytic subunit
103150191	0	-11.4254	cul4b	cullin-4B
103140208	0	-11.3051	llph	protein LLP homolog
103144823	0	-10.7989	znf330	zinc finger protein 330
103140140	0	-10.107	atp11c	phospholipid-transporting ATPase IG isoform X5
103150189	0	-10.0644	c1galt1c1	C1GALT1-specific chaperone 1
103135848	0	-9.96912	s100z	protein S100-Z isoform X1
103135683	0	-9.52806	r3hdm2	R3H domain-containing protein 2 isoform X2
103142983	0	-9.21421	LOC103142983	AP-1 complex subunit beta-1-like isoform X5
103147307	0	-8.963	LOC103147307	fatty aldehyde dehydrogenase-like isoform X1
103140150	0	-8.91569	rbmx	RNA-binding motif protein, X chromosome isoform X2
103140163	0	-8.10801	taf7	transcription initiation factor TFIID subunit 7
103135526	0	-8.02203	rbm22	pre-mRNA-splicing factor RBM22
103140149	0	-7.82753	tm9sf2	transmembrane 9 superfamily member 2 isoform X2
103146568	0	-6.71286	ccdc94	coiled-coil domain-containing protein 94
103153671	0	-6.19621	isg20l2	interferon-stimulated 20 kDa exonuclease-like 2 isoform X1
103152332	0	-5.79414	LOC103152332	uncharacterized protein LOC103152332
103155238	0	-5.57299	LOC103155238	toll-like receptor 1 isoform X2
103150175	0	-5.42373	bcorl1	BCL-6 corepressor-like protein 1 isoform X1
103139122	0	-5.4074	pym1	partner of Y14 and mago
103156520	0	-4.59312	tph1	tryptophan 5-hydroxylase 1
103150174	0	-4.56883	cstf2	cleavage stimulation factor subunit 2
103132876	0	-4.54934	LOC103132876	integrin alpha-X-like, partial
103130802	0	-4.53257	pdhb	pyruvate dehydrogenase E1 component subunit beta, mitochondrial
103147201	0	-4.33616	LOC103147201	uncharacterized protein LOC103147201
103141069	0	-4.00543	ttc1	tetratricopeptide repeat protein 1
103154089	0	-3.72732	wdr4	tRNA (guanine-N(7)-)-methyltransferase non-catalytic subunit WDR4
103152856	0	-3.33209	LOC103152856	septin-7 isoform X2
103142503	0	-3.23821	csnk2a2	casein kinase II subunit alpha\'
103140167	0	-3.18289	f9	coagulation factor IX
103150186	0	-3.15217	ocrl	inositol polyphosphate 5-phosphatase OCRL-1 isoform X2
107833976	0	-3.02921	LOC107833976	dehydrogenase/reductase SDR family member 13-like, partial
103146416	0	-3.0015	LOC103146416	zinc transporter Slc39a7-like isoform X2
103149039	0	-2.85753	rnf175	RING finger protein 175
103140154	0	-2.78473	arhgef6	rho guanine nucleotide exchange factor 6 isoform X1
103131100	0	-2.51761	LOC103131100	PEX5-related protein-like
103150192	0	-2.37228	lamp2	lysosome-associated membrane glycoprotein 2 isoform X1
103136823	0	-2.2747	LOC103136823	nectin-2-like
103151186	0	-2.05902	cpq	carboxypeptidase Q isoform X1
103156734	0	-1.98083	coq10b	coenzyme Q-binding protein COQ10 homolog B, mitochondrial
103129360	0	-1.86061	sccpdh	saccharopine dehydrogenase-like oxidoreductase isoform X1
103136265	0	-1.71663	slc1a5	neutral amino acid transporter B(0)
103145474	0	-1.67859	tnpo2	transportin-2 isoform X1
103142149	0	-1.58062	eftud2	116 kDa U5 small nuclear ribonucleoprotein component
103138434	0	-1.55914	LOC103138434	E3 ubiquitin-protein ligase RNF220-like isoform X4
103149421	0	-1.55446	LOC103149421	HRAS-like suppressor 3
103141589	0	-1.49723	LOC103141589	apolipoprotein A-I-like
103130984	0	-1.45489	mcoln2	mucolipin-2 isoform X2
103153884	0	-1.36519	LOC103153884	ATP-dependent RNA helicase DDX19B
103139681	0	-1.29099	LOC103139681	cell adhesion molecule 1-like
103153922	0	-1.19754	mylk	myosin light chain kinase, smooth muscle isoform X1
103130396	0	-1.16535	ints8	integrator complex subunit 8 isoform X2
103137449	0	-1.13735	abcg8	ATP-binding cassette sub-family G member 8
103150382	0	-1.04475	tax1bp1	tax1-binding protein 1
103135172	0	-0.918395	LOC103135172	ribonuclease UK114-like isoform X2
103143545	0	-0.904393	atic	bifunctional purine biosynthesis protein PURH
103133900	0	-0.821618	LOC103133900	adenylosuccinate synthetase isozyme 2-like
103145356	0	-0.773195	st3gal4	CMP-N-acetylneuraminate-beta-galactosamide-alpha-2,3-sialyltransferase 4
103145593	0	-0.698218	vtn	vitronectin isoform X1
103142185	0	-0.692045	cnp	2\',3\'-cyclic-nucleotide 3\'-phosphodiesterase
103155560	0	-0.674575	LOC103155560	tricarboxylate transport protein, mitochondrial isoform X1
103135026	0	-0.670929	LOC103135026	protein NDRG1-like isoform X1
103146530	0	-0.498669	slc2a2	solute carrier family 2, facilitated glucose transporter member 2
103155152	0	0.56763	atp5a1	ATP synthase subunit alpha, mitochondrial
103137049	0	0.646543	LOC103137049	dimethylaniline monooxygenase
103139167	0	0.718562	LOC103139167	vitronectin-like
103135556	0	0.951159	LOC103135556	PRELI domain containing protein 3B-like
103147544	0	1.04456	dnajc13	dnaJ homolog subfamily C member 13 isoform X7
103130688	0	1.13794	cth	cystathionine gamma-lyase
103133157	0	1.18682	amdhd1	probable imidazolonepropionase
103139885	0	1.33004	slc7a2	cationic amino acid transporter 2 isoform X1
103138578	0	1.40532	acp1	low molecular weight phosphotyrosine protein phosphatase isoform X1
103149437	0	1.69574	usp16	ubiquitin carboxyl-terminal hydrolase 16 isoform X1
103130299	0	1.75783	atad3a	ATPase family AAA domain-containing protein 3A
103139423	0	1.7762	sord	sorbitol dehydrogenase isoform X2
103155372	0	1.86992	ascc3	activating signal cointegrator 1 complex subunit 3
103142480	0	1.91584	LOC103142480	NADH-cytochrome b5 reductase 2-like
103147123	0	2.0754	fam134a	LOW QUALITY PROTEIN: protein FAM134A
103147711	0	2.4078	LOC103147711	annexin A3-like
103138378	0	2.58461	LOC103138378	serine/threonine-protein kinase OSR1-like
103130713	0	2.61144	LOC103130713	complement component C7-like
103151282	0	3.27626	csrp2	cysteine and glycine-rich protein 2
103149049	0	3.43729	LOC103149049	fibrinogen alpha chain-like isoform X2
103146801	0	3.56203	LOC103146801	arf-GAP with SH3 domain, ANK repeat and PH domain-containing protein 2-like isoform X1
103141065	0	3.98696	LOC103141065	solute carrier family 22 member 6-like isoform X2
103139366	0	4.9112	gpc5	glypican-5
103156773	0	5.63016	tkfc	triokinase/FMN cyclase
103142818	0	6.2782	LOC103142818	b(0,+)-type amino acid transporter 1-like isoform X2
103148336	0	6.62612	plekhh1	pleckstrin homology domain-containing family H member 1
103145282	0	9.50642	rftn1	raftlin isoform X2
103151031	0	9.58752	ddx55	ATP-dependent RNA helicase DDX55
103153802	0	10.3443	LOC103153802	mucin-5AC-like isoform X2
103130300	0	10.7862	ssu72	RNA polymerase II subunit A C-terminal domain phosphatase SSU72
103135431	0	11.4517	plk2	serine/threonine-protein kinase PLK2
103142392	-12.8786	0	LOC103142392	60S ribosomal protein L15
103140869	-12.2212	0	erp44	endoplasmic reticulum resident protein 44
103134884	-12.2183	0	LOC103134884	C-C motif chemokine 3-like
103155988	-12.215	0	LOC103155988	heterogeneous nuclear ribonucleoprotein A0-like
103155973	-12.1819	0	b4galt1	beta-1,4-galactosyltransferase 1
103141655	-11.8204	0	rps2	40S ribosomal protein S2
103137763	-11.7824	0	LOC103137763	UPF0739 protein C1orf74 homolog
103156432	-11.562	0	LOC103156432	phosphomannomutase 2-like
103131222	-11.5466	0	tbc1d9b	TBC1 domain family member 9B isoform X2
103131459	-11.4452	0	LOC103131459	CTD small phosphatase-like protein 2-A isoform X2
103130783	-11.3428	0	canx	calnexin isoform X3
103131209	-11.0571	0	nfkb1	LOW QUALITY PROTEIN: nuclear factor NF-kappa-B p105 subunit
103142403	-11.0367	0	asns	asparagine synthetase
103132424	-11.0244	0	LOC103132424	polyadenylate-binding protein-interacting protein 2
103131211	-11.0024	0	ube2d3	ubiquitin-conjugating enzyme E2 D3
103131216	-10.9135	0	LOC103131216	selenoprotein T2-like
103140963	-10.858	0	LOC103140963	synaptogyrin-2-like
103156433	-10.7319	0	LOC103156433	high mobility group protein B2-like
103144671	-10.6449	0	LOC103144671	uncharacterized protein LOC103144671
103155910	-10.6403	0	LOC103155910	ras-related protein Rab-35-like
103142400	-10.5872	0	LOC103142400	septin-7-like isoform X1
103155912	-10.5044	0	arl6ip1	ADP-ribosylation factor-like protein 6-interacting protein 1
103151290	-10.2116	0	apex1	DNA-(apurinic or apyrimidinic site) lyase
103135473	-10.1249	0	LOC103135473	fructose-1,6-bisphosphatase isozyme 2, partial
103151028	-9.98684	0	denr	density-regulated protein isoform X3
103141313	-9.95108	0	athl1	acid trehalase-like protein 1
103137354	-9.64848	0	LOC103137354	eukaryotic translation initiation factor 4E-1A isoform X2
103137352	-9.60851	0	gar1	H/ACA ribonucleoprotein complex subunit 1
103155972	-9.22082	0	exosc3	exosome complex component RRP40
103142389	-9.11774	0	ube2e1	ubiquitin-conjugating enzyme E2 E1
103141613	-9.07183	0	dxo	decapping and exoribonuclease protein
103130096	-9.07036	0	LOC103130096	histone-lysine N-methyltransferase SETDB2
103142372	-9.01468	0	LOC103142372	glucocorticoid modulatory element-binding protein 1-like isoform X2
103155997	-8.91493	0	LOC103155997	E3 ubiquitin-protein ligase RNF130-like
103131217	-8.85937	0	LOC103131217	mitochondrial inner membrane protein COX18 isoform X1
103142393	-8.20859	0	nr1d2	nuclear receptor subfamily 1 group D member 2
103155991	-7.87791	0	fam13b	protein FAM13B isoform X7
103142409	-7.06617	0	LOC103142409	glucocorticoid-induced transcript 1 protein isoform X3
103132623	-6.60556	0	LOC103132623	interferon-induced very large GTPase 1-like
103155908	-6.2902	0	anapc2	anaphase-promoting complex subunit 2
103146429	-6.03558	0	LOC103146429	uncharacterized protein LOC103146429
103156169	-6.00727	0	scfd1	sec1 family domain-containing protein 1
103142396	-5.89978	0	top2b	DNA topoisomerase 2-beta isoform X1
103137670	-5.79104	0	gpatch11	G patch domain-containing protein 11
103147149	-5.74867	0	arhgef7	rho guanine nucleotide exchange factor 7 isoform X3
103135356	-5.39179	0	prune2	protein prune homolog 2 isoform X1
103137771	-5.17776	0	tomm6	mitochondrial import receptor subunit TOM6 homolog
103149358	-5.15953	0	LOC103149358	synapse-associated protein 1-like isoform X2
103155911	-5.14591	0	LOC103155911	serine/arginine repetitive matrix protein 2-like isoform X2
103132422	-5.07371	0	LOC103132422	matrin-3-like isoform X1
103133907	-4.94761	0	LOC103133907	gamma-aminobutyric acid receptor subunit beta-4-like
103137476	-4.92558	0	LOC103137476	coronin-1B-like
103153916	-4.92022	0	LOC103153916	interferon alpha/beta receptor 2-like isoform X1
103153473	-4.91683	0	vps13d	LOW QUALITY PROTEIN: vacuolar protein sorting-associated protein 13D
103156716	-4.91079	0	LOC103156716	alpha-endosulfine
103151288	-4.78398	0	LOC103151288	uncharacterized protein LOC103151288 isoform X1
103131212	-4.75329	0	polr2b	DNA-directed RNA polymerase II subunit RPB2 isoform X1
103146978	-4.49517	0	impad1	inositol monophosphatase 3
103130700	-4.47567	0	LOC103130700	alpha-1,3-mannosyl-glycoprotein 2-beta-N-acetylglucosaminyltransferase-like
103148521	-4.11377	0	sftpb	pulmonary surfactant-associated protein B
103154815	-3.85602	0	radil	ras-associating and dilute domain-containing protein isoform X1
103155497	-3.72783	0	LOC103155497	sacsin-like, partial
103146427	-3.72735	0	LOC103146427	CCR4-NOT transcription complex subunit 3-like
103144821	-3.71444	0	tbc1d9	TBC1 domain family member 9
103155844	-3.66288	0	LOC103155844	trafficking kinesin-binding protein 2 isoform X1
103142394	-3.62934	0	thrb	thyroid hormone receptor beta isoform X4
103139226	-3.53951	0	LOC103139226	zinc-binding protein A33-like
103136737	-3.53862	0	LOC103136737	kazrin-like isoform X1
103138243	-3.3629	0	kctd14	BTB/POZ domain-containing protein KCTD14
103130915	-3.24149	0	LOC103130915	zinc finger protein 281-like
103133852	-3.20479	0	LOC103133852	flotillin-2a isoform X2
103130558	-3.1443	0	LOC103130558	NACHT, LRR and PYD domains-containing protein 12-like
103141046	-3.0796	0	psma2	proteasome subunit alpha type-2
103140983	-2.9968	0	LOC103140983	ubiquitin carboxyl-terminal hydrolase 22 isoform X2
103154126	-2.98157	0	dnpep	aspartyl aminopeptidase isoform X1
103155965	-2.95115	0	LOC103155965	protein NipSnap homolog 3B-like
103133584	-2.94556	0	cog2	conserved oligomeric Golgi complex subunit 2 isoform X1
103130097	-2.9201	0	creg1	protein CREG1
103137201	-2.91819	0	tie1	tyrosine-protein kinase receptor Tie-1 isoform X2
103130785	-2.70871	0	LOC103130785	LOW QUALITY PROTEIN: mastermind-like protein 1
103139227	-2.63113	0	megf8	multiple epidermal growth factor-like domains protein 8
103142050	-2.51398	0	LOC103142050	collagen alpha-1(XXVII) chain B-like
103149031	-2.41529	0	LOC103149031	sushi domain-containing protein 2-like isoform X1
103144069	-2.37795	0	LOC103144069	bactericidal permeability-increasing protein-like
103151644	-2.36763	0	slc10a7	sodium/bile acid cotransporter 7 isoform X2
103140046	-2.35007	0	tmem8a	transmembrane protein 8A isoform X3
103142710	-2.29291	0	scarb2	lysosome membrane protein 2 isoform X1
103141662	-2.26637	0	tom1l2	TOM1-like protein 2 isoform X1
103135895	-2.18726	0	LOC103135895	torsin-1A-like isoform X2
103129806	-2.12153	0	stoml2	stomatin-like protein 2, mitochondrial
103142824	-2.11314	0	cdc42se2	CDC42 small effector protein 2
103142574	-2.08482	0	LOC103142574	ubiquitin carboxyl-terminal hydrolase 37-like
103135693	-2.08241	0	atp6v1h	V-type proton ATPase subunit H isoform X2
103134450	-2.03951	0	nuak1	NUAK family SNF1-like kinase 1 isoform X1
103150337	-2.0378	0	smarcc1	SWI/SNF complex subunit SMARCC1 isoform X1
103147660	-2.02094	0	stat2	signal transducer and activator of transcription 2
103156098	-1.99106	0	nubp2	cytosolic Fe-S cluster assembly factor NUBP2
103135739	-1.95969	0	aqp1	aquaporin-1
103135161	-1.8359	0	jarid2	protein Jumonji
103152628	-1.79509	0	gramd3	GRAM domain-containing protein 3 isoform X1
103135380	-1.72681	0	LOC103135380	LMBR1 domain-containing protein 2-B-like
103154560	-1.69694	0	LOC103154560	transmembrane protein C9orf91 homolog
103144922	-1.64653	0	LOC103144922	uncharacterized protein LOC103144922
103130102	-1.56241	0	LOC103130102	coagulation factor VII-like
103138829	-1.52145	0	LOC103138829	cytochrome P450 2J6-like isoform X1
103149542	-1.43039	0	LOC103149542	cytochrome b-c1 complex subunit 6, mitochondrial-like
103154328	-1.41533	0	hdac7	histone deacetylase 7 isoform X1
103130045	-1.37952	0	eif5a2	eukaryotic translation initiation factor 5A-2
103146111	-1.33785	0	cldn2	claudin-2
103135779	-1.33334	0	cebpd	CCAAT/enhancer-binding protein delta
103146561	-1.22272	0	LOC103146561	receptor expression-enhancing protein 5-like isoform X3
103152248	-0.988568	0	LOC103152248	canalicular multispecific organic anion transporter 1-like
103147475	-0.888396	0	LOC103147475	solute carrier family 43 member 3-like
103131079	-0.833814	0	man2a1	alpha-mannosidase 2
103147571	-0.706603	0	LOC103147571	ethanolamine kinase 1-like isoform X3
103140873	-0.582289	0	sec61b	protein transport protein Sec61 subunit beta
103155688	-0.552483	0	rsl24d1	probable ribosome biogenesis protein RLP24
103130178	-0.41323	0	LOC103130178	vitamin K-dependent protein C
103147507	0.317532	0	eef1g	elongation factor 1-gamma
103129649	0.363403	0	c5	complement C5 isoform X1
103129850	0.499043	0	gtpbp4	nucleolar GTP-binding protein 1
103134478	0.509809	0	tcp1	T-complex protein 1 subunit alpha
103135787	0.526287	0	LOC103135787	serine/arginine-rich splicing factor 11-like isoform X1
103143238	0.5328	0	LOC103143238	14-3-3 protein beta/alpha-1-like
103147722	0.566487	0	LOC103147722	S-adenosylmethionine synthase-like
103139964	0.593613	0	eif4a2	eukaryotic initiation factor 4A-II
103139772	0.701108	0	tram1	translocating chain-associated membrane protein 1
103140316	0.712569	0	mpc2	mitochondrial pyruvate carrier 2
103130050	0.723204	0	eif2s3	eukaryotic translation initiation factor 2 subunit 3
103155432	0.774641	0	epdr1	mammalian ependymin-related protein 1
103134617	0.801316	0	rps10	40S ribosomal protein S10
103141206	0.830892	0	LOC103141206	low-density lipoprotein receptor-related protein 1-like isoform X1
103140707	0.885587	0	pik3cb	phosphatidylinositol 4,5-bisphosphate 3-kinase catalytic subunit beta isoform isoform X2
103150445	0.946687	0	atp5d	ATP synthase subunit delta, mitochondrial isoform X2
103155847	0.951015	0	nbeal1	neurobeachin-like protein 1 isoform X2
103142004	0.96647	0	gldc	glycine dehydrogenase (decarboxylating), mitochondrial isoform X2
103153434	0.977177	0	shmt1	serine hydroxymethyltransferase, cytosolic
103152901	0.999325	0	LOC103152901	APOBEC1 complementation factor-like isoform X1
103140887	1.03734	0	LOC103140887	metalloreductase STEAP4-like
103156514	1.03823	0	sigirr	single Ig IL-1-related receptor
103140565	1.04345	0	yme1l1	ATP-dependent zinc metalloprotease YME1L1 isoform X1
103150317	1.04423	0	LOC103150317	fucolectin-7-like
103145074	1.0829	0	LOC103145074	cytochrome c oxidase subunit 7C, mitochondrial
103156712	1.18747	0	LOC103156712	cathepsin S
103152374	1.30241	0	LOC103152374	eukaryotic translation initiation factor 3 subunit C
103130094	1.38866	0	LOC103130094	coagulation factor VII-like
103142317	1.40014	0	comtd1	catechol O-methyltransferase domain-containing protein 1 isoform X2
103154281	1.40855	0	lsm8	LSM8 homolog, U6 small nuclear RNA associated
103154763	1.44675	0	nars	asparagine--tRNA ligase, cytoplasmic isoform X1
103146383	1.47878	0	LOC103146383	zinc finger protein 384-like isoform X1
103130136	1.55598	0	LOC103130136	allantoinase, mitochondrial-like
103156142	1.64726	0	lamc1	laminin subunit gamma-1
103148149	1.68695	0	pwwp2b	PWWP domain-containing protein 2B
103137641	1.75046	0	ptk7	inactive tyrosine-protein kinase 7
103130892	1.80758	0	hsd17b10	3-hydroxyacyl-CoA dehydrogenase type-2
103145658	1.82622	0	LOC103145658	junctional adhesion molecule A
103144546	1.86494	0	dusp1	dual specificity protein phosphatase 1
103155608	1.88121	0	bco1	beta,beta-carotene 15,15\'-dioxygenase isoform X1
103136510	2.0102	0	pbld	phenazine biosynthesis-like domain-containing protein
103142483	2.04375	0	LOC103142483	alpha-parvin isoform X2
103140795	2.06382	0	krtcap2	keratinocyte-associated protein 2
103144973	2.12518	0	LOC103144973	coronin-1A-like
103145393	2.1305	0	LOC103145393	glycerophosphodiester phosphodiesterase domain-containing protein 5-like
103145425	2.55828	0	xpo6	exportin-6
103144034	2.70352	0	narf	nuclear prelamin A recognition factor
103146192	2.75341	0	coro2b	coronin-2B, partial
103140233	2.79514	0	LOC103140233	pleiotrophin
103154884	2.85375	0	LOC103154884	uncharacterized protein C18orf63 homolog isoform X4
103142191	2.8821	0	dhx58	probable ATP-dependent RNA helicase DHX58
103149366	2.88414	0	LOC103149366	cadherin-related family member 5-like isoform X1
103153448	2.91814	0	kmt5b	histone-lysine N-methyltransferase KMT5B
103146095	2.95669	0	LOC103146095	atypical chemokine receptor 4-like
103140533	2.98989	0	LOC103140533	C-C motif chemokine 20-like
103154994	3.01145	0	LOC103154994	prolyl endopeptidase-like
103136588	3.02791	0	LOC103136588	lysosomal protective protein-like
103154080	3.07737	0	tmem179b	transmembrane protein 179B
103136514	3.15836	0	LOC103136514	hexokinase-1-like isoform X1
103151145	3.34489	0	LOC103151145	DIS3-like exonuclease 1
103135676	3.39645	0	LOC103135676	macrophage mannose receptor 1-like isoform X1
103136739	3.40891	0	tnfrsf1a	tumor necrosis factor receptor superfamily member 1A
103143467	3.415	0	LOC103143467	Na(+)/H(+) exchanger beta-like
103131394	3.45149	0	pik3r4	phosphoinositide 3-kinase regulatory subunit 4 isoform X1
103131393	3.47501	0	LOC103131393	calcium-transporting ATPase type 2C member 1-like isoform X3
103155165	3.51356	0	LOC103155165	ras-related protein Rab-11B-like
103130066	3.74994	0	LOC103130066	protein SON isoform X1
103129745	3.75075	0	katnbl1	KATNB1-like protein 1 isoform X1
103142973	3.79005	0	iqgap2	ras GTPase-activating-like protein IQGAP2
103150384	3.86456	0	cpvl	probable serine carboxypeptidase CPVL
103155217	3.87466	0	psmd13	26S proteasome non-ATPase regulatory subunit 13
103149753	3.96862	0	ring1	E3 ubiquitin-protein ligase RING1 isoform X2
103137042	3.98616	0	fam20b	glycosaminoglycan xylosylkinase
103151135	3.98772	0	LOC103151135	golgin subfamily B member 1-like isoform X3
103147725	4.02896	0	LOC103147725	redox-regulatory protein FAM213A-like isoform X1
103137492	4.08018	0	plscr3	phospholipid scramblase 3
103135880	4.14817	0	LOC103135880	proline-rich protein 13-like
103131392	4.25885	0	slc39a1	zinc transporter ZIP1
103143437	4.67973	0	LOC103143437	glycogen synthase kinase-3 beta-like isoform X1
103147670	4.70499	0	LOC103147670	uncharacterized protein LOC103147670
103131721	4.86402	0	LOC103131721	ras GTPase-activating-like protein IQGAP1
103132345	4.86435	0	gpatch1	G patch domain-containing protein 1
103142631	4.9271	0	zdhhc13	palmitoyltransferase ZDHHC13 isoform X3
103131711	4.98849	0	LOC103131711	primary amine oxidase, liver isozyme-like
103140302	5.08366	0	piga	phosphatidylinositol N-acetylglucosaminyltransferase subunit A
103143485	5.34664	0	LOC103143485	hormone-sensitive lipase-like
103139941	5.35803	0	LOC103139941	chymotrypsin A-like isoform X1
103143508	5.64345	0	LOC103143508	LOW QUALITY PROTEIN: uncharacterized protein LOC103143508
103140598	5.67537	0	LOC103140598	RNA-binding protein 4B-like
103142645	5.92456	0	ero1a	ERO1-like protein alpha
103149700	6.17041	0	LOC103149700	CD151 antigen-like
103149705	6.29876	0	madd	MAP kinase-activating death domain protein isoform X6
103155601	6.40629	0	LOC103155601	protein NLRC3-like
103130002	6.55679	0	atp9b	probable phospholipid-transporting ATPase IIB isoform X1
103129407	6.56263	0	LOC103129407	isocitrate dehydrogenase
103142686	6.94565	0	crtc3	CREB-regulated transcription coactivator 3 isoform X4
103130943	7.21674	0	LOC103130943	stonustoxin subunit alpha-like
103143436	7.82485	0	LOC103143436	protein capicua homolog isoform X3
103149752	7.89324	0	rps18	40S ribosomal protein S18
103145475	7.93293	0	LOC103145475	interleukin-12 receptor subunit beta-2-like
103154975	8.23063	0	cap1	adenylyl cyclase-associated protein 1 isoform X2
103131304	8.59691	0	derl2	derlin-2
103143511	8.6245	0	hivep1	zinc finger protein 40
103151647	8.79227	0	LOC103151647	protein NLRC3-like isoform X2
103153823	8.79474	0	qrsl1	glutamyl-tRNA(Gln) amidotransferase subunit A, mitochondrial
103131153	8.86407	0	LOC103131153	uncharacterized protein LOC103131153
103155947	8.89498	0	LOC103155947	histone H3.3
103130012	9.02639	0	LOC103130012	plectin-like isoform X2
103154978	9.13815	0	ncdn	neurochondrin
103147393	9.13826	0	LOC103147393	uncharacterized protein LOC103147393
103131200	9.16999	0	LOC103131200	NACHT, LRR and PYD domains-containing protein 12-like isoform X3
103143514	9.19475	0	LOC103143514	syndecan-2-like
103147396	9.20106	0	ccdc97	coiled-coil domain-containing protein 97 isoform X1
103142320	9.21908	0	samd8	sphingomyelin synthase-related protein 1
103151130	9.33263	0	arfgap2	ADP-ribosylation factor GTPase-activating protein 2 isoform X2
103143449	9.34242	0	LOC103143449	zinc finger MYM-type protein 4 isoform X2
103152447	9.34653	0	LOC103152447	E3 ubiquitin/ISG15 ligase TRIM25-like
103143454	9.36311	0	pithd1	PITH domain-containing protein 1
103137511	9.38503	0	LOC103137511	vigilin-like
103156200	9.42362	0	fam207a	protein FAM207A
103131515	9.43256	0	LOC103131515	eukaryotic translation initiation factor 3 subunit E-B
103143471	9.43773	0	LOC103143471	nucleolin 2-like
103131710	9.44306	0	LOC103131710	membrane primary amine oxidase-like, partial
103147391	9.51403	0	LOC103147391	nuclear body protein SP140-like isoform X3
103134165	9.57298	0	macrod2	O-acetyl-ADP-ribose deacetylase MACROD2
103131651	9.61399	0	kifc3	kinesin-like protein KIFC3 isoform X5
103130829	9.70306	0	efl1	elongation factor-like GTPase 1 isoform X1
103156894	9.71002	0	LOC103156894	CCAAT/enhancer-binding protein gamma
103141198	9.71612	0	smc5	structural maintenance of chromosomes protein 5 isoform X1
103136744	9.72428	0	tapbpl	tapasin-related protein
103156205	9.72855	0	LOC103156205	calcipressin-1-like
103154971	9.86294	0	meaf6	chromatin modification-related protein MEAF6 isoform X2
103130005	9.86661	0	fbxl6	F-box/LRR-repeat protein 6
103129415	9.88581	0	LOC103129415	uncharacterized protein LOC103129415 isoform X1
103131810	9.90088	0	LOC103131810	CKLF-like MARVEL transmembrane domain-containing protein 6, partial
103155226	9.90406	0	LOC103155226	inositol hexakisphosphate and diphosphoinositol-pentakisphosphate kinase 2-like isoform X2
103147727	9.93388	0	LOC103147727	leucine zipper putative tumor suppressor 2 homolog
103143498	9.95649	0	tpmt	thiopurine S-methyltransferase
103142652	9.96553	0	LOC103142652	gamma-secretase subunit Aph-1b
103136274	9.97805	0	LOC103136274	rho-related GTP-binding protein RhoU-like
103130053	9.98905	0	sat1	diamine acetyltransferase 1
103129140	10.0186	0	LOC103129140	corticosteroid 11-beta-dehydrogenase isozyme 2-like
103142700	10.048	0	iqgap1	ras GTPase-activating-like protein IQGAP1
103153583	10.0545	0	apip	methylthioribulose-1-phosphate dehydratase isoform X1
103133127	10.0816	0	LOC103133127	GON-4-like protein, partial
103132332	10.1592	0	LOC103132332	FH1/FH2 domain-containing protein 1
103144215	10.1812	0	ncmap	noncompact myelin-associated protein
103143465	10.3225	0	srsf10	serine/arginine-rich splicing factor 10 isoform X3
103129408	10.3424	0	cog8	conserved oligomeric Golgi complex subunit 8
103129420	10.3654	0	anxa2	annexin A2
103147429	10.3703	0	dexi	dexamethasone-induced protein
103130393	10.3916	0	msto1	protein misato homolog 1
103142660	10.4104	0	atp6v0d1	V-type proton ATPase subunit d 1
103153580	10.4835	0	ttc17	tetratricopeptide repeat protein 17 isoform X1
103133660	10.4879	0	cib1	calcium and integrin-binding protein 1
103131519	10.5004	0	nudcd1	nudC domain-containing protein 1 isoform X1
103130065	10.5224	0	sts	steryl-sulfatase
103143484	10.5298	0	LOC103143484	probable ATP-dependent RNA helicase ddx6
103131161	10.5393	0	LOC103131161	ras-related protein Rab-11A
103130390	10.5636	0	LOC103130390	XK-related protein 8-like
103136742	10.5706	0	mrpl51	39S ribosomal protein L51, mitochondrial
103131649	10.6694	0	katnb1	katanin p80 WD40 repeat-containing subunit B1
103129412	10.6759	0	gpn1	GPN-loop GTPase 1 isoform X1
103143455	10.6915	0	tceb3	transcription elongation factor B polypeptide 3 isoform X1
103143494	10.726	0	LOC103143494	zinc finger and BTB domain-containing protein 22-like
103143469	10.7427	0	kdm1b	lysine-specific histone demethylase 1B
103154108	10.7553	0	LOC103154108	mitogen-activated protein kinase kinase kinase 2 isoform X1
103153455	10.7617	0	LOC103153455	gamma-aminobutyric acid receptor-associated protein-like 2
103142642	10.8619	0	LOC103142642	Golgi apparatus protein 1-like isoform X1
103131647	10.9319	0	LOC103131647	ras-related protein Rab-8B
103132958	10.9415	0	LOC103132958	H-2 class II histocompatibility antigen, E-S beta chain-like isoform X1
103130563	11.0089	0	snrnp70	U1 small nuclear ribonucleoprotein 70 kDa
103155213	11.0142	0	LOC103155213	casein kinase II subunit alpha\'-like
103130388	11.0436	0	smim13	small integral membrane protein 13
103142675	11.1629	0	ndufs3	NADH dehydrogenase
103150261	11.2266	0	LOC103150261	tripartite motif-containing protein 14-like
103130564	11.2571	0	scaf1	splicing factor, arginine/serine-rich 19
103149873	11.3352	0	LOC103149873	transmembrane emp24 domain-containing protein 3-like
103129421	11.3417	0	nob1	RNA-binding protein NOB1
103147087	11.3766	0	LOC103147087	APOBEC1 complementation factor-like isoform X2
103142637	11.4589	0	slc22a18	solute carrier family 22 member 18
103143441	11.532	0	ndufs5	NADH dehydrogenase
103154979	11.5414	0	psmb2	proteasome subunit beta type-2
103154963	11.5571	0	LOC103154963	eyes absent homolog 3-like isoform X1
103143439	11.6236	0	LOC103143439	zinc finger protein 706-like
103154976	11.6701	0	ppt1	palmitoyl-protein thioesterase 1
103131539	11.8976	0	vps13c	vacuolar protein sorting-associated protein 13C
103143491	11.9626	0	naxe	NAD(P)H-hydrate epimerase
103149704	11.9957	0	nr1h3	oxysterols receptor LXR-alpha
103130147	12.0052	0	LOC103130147	ubiquitin-conjugating enzyme E2 Q2-like isoform X2
103129653	12.2105	0	emc7	ER membrane protein complex subunit 7
103156193	12.255	0	gyg2	glycogenin-2
103155220	13.9581	0	LOC103155220	cathepsin D
103141681	16.6693	0	LOC103141681	ADP/ATP translocase 3
103155985	-3.96157	1.68113	maea	macrophage erythroblast attacher isoform X2
103137258	-1.67021	0.884211	LOC103137258	proteoglycan 4 isoform X2
103155631	-1.05455	1.13802	slc26a5	prestin
103154111	-0.433205	0.983073	ephx2	bifunctional epoxide hydrolase 2 isoform X1
103136591	0.41674	-1.58809	got2	aspartate aminotransferase, mitochondrial
103150521	0.451305	-4.81043	LOC103150521	uromodulin-like isoform X2
103154630	0.612957	-2.66677	LOC103154630	complement C2-like
103156321	0.782457	-5.43854	LOC103156321	complement C3-like
103147202	0.835101	-1.33331	LOC103147202	cystathionine beta-synthase-like
103151536	0.947593	-0.737897	phyh	phytanoyl-CoA dioxygenase, peroxisomal
103147946	0.954268	-11.8286	LOC103147946	saxitoxin and tetrodotoxin-binding protein 1-like
103140960	0.969945	-5.46553	LOC103140960	galectin-3-binding protein B-like isoform X2
103154986	1.0538	-1.29735	LOC103154986	protein argonaute-4 isoform X1
103146804	1.11724	-2.3	allc	probable allantoicase
103154327	1.20336	-1.18576	LOC103154327	alpha-2-macroglobulin-like
103132701	1.22762	-1.67885	LOC103132701	cytochrome P450 2K1-like
103134814	1.50613	-3.19079	LOC103134814	cytochrome P450 27C1
103143863	1.55468	-0.554632	LOC103143863	beta-1,3-galactosyltransferase 2-like
103134735	1.95303	-2.10067	LOC103134735	ES1 protein homolog, mitochondrial-like
103129474	2.88901	-1.13682	ftcd	formimidoyltransferase-cyclodeaminase
103130088	2.91167	-0.622855	LOC103130088	coagulation factor X-like
103136135	3.4817	-1.94771	LOC103136135	regulator of G-protein signaling 6-like isoform X3
103133105	6.09208	-3.03314	LOC103133105	complement C3-like
103154107	10.2715	-7.34205	sumo1	small ubiquitin-related modifier 1
103131158	12.8524	-0.779535	herc1	probable E3 ubiquitin-protein ligase HERC1 isoform X13
103153581	13.0973	-0.626258	hsd17b12	very-long-chain 3-oxoacyl-CoA reductase
103156614	13.327	-11.5561	slc13a5	solute carrier family 13 member 5
