# Supplementary material for: Fixation of allelic gene expression landscapes and expression bias pattern shape the transcriptome of the clonal Amazon molly
Source: HighWire-hosted journal article supplement (doi:10.1101/gr.268870.120), 2021-02-05
Supplement: Supplemental_Table_S6.xlsx [file Supplemental_Table_S6.xlsx]

## Sheet: Supplment Table 8.csv
Supplemental Table S6. Genes exhibiting different allelic expression bias between P. formosa and interspecies hybrid in ovary
geneID	clonal allelic expression pattern (log p.lat/p.mex)	F1 allelic expression pattern (log p.lat/p.mex)	Locus	Protein.name
103132792	0	-13.0899	LOC103132792	E3 ubiquitin-protein ligase TRIM21-like, partial
103129190	0	-11.9879	lysmd1	lysM and putative peptidoglycan-binding domain-containing protein 1 isoform X3
103140162	0	-11.8756	LOC103140162	sodium/hydrogen exchanger 6
103140155	0	-10.3824	LOC103140155	tumor necrosis factor ligand superfamily member 6-like
103156575	0	-10.2267	akap11	A-kinase anchor protein 11 isoform X1
103141890	0	-10.1364	LOC103141890	1-phosphatidylinositol 4,5-bisphosphate phosphodiesterase gamma-1-like
103150188	0	-9.90175	clic2	chloride intracellular channel protein 2
107833524	0	-9.89312	LOC107833524	uncharacterized protein LOC107833524 isoform X3
103131245	0	-9.84858	LOC103131245	coxsackievirus and adenovirus receptor homolog isoform X2
103140150	0	-9.80249	rbmx	RNA-binding motif protein, X chromosome isoform X2
103150176	0	-9.75179	LOC103150176	mid1-interacting protein 1-like
103137571	0	-9.74884	LOC103137571	cytidine deaminase-like isoform X2
103153671	0	-9.41949	isg20l2	interferon-stimulated 20 kDa exonuclease-like 2 isoform X1
103139118	0	-9.37799	LOC103139118	factor V activator RVV-V alpha-like isoform X2
103150172	0	-9.25273	xkrx	XK-related protein 2
103146917	0	-9.24971	LOC103146917	DELTA-actitoxin-Aas1a-like, partial
103153682	0	-9.11426	LOC103153682	C-type lectin domain family 4 member G-like isoform X1
103140163	0	-8.16537	taf7	transcription initiation factor TFIID subunit 7
103146877	0	-8.05004	LOC103146877	ABI gene family member 3-like isoform X1
103132117	0	-7.99801	LOC103132117	NACHT, LRR and PYD domains-containing protein 12-like
103140149	0	-7.91229	tm9sf2	transmembrane 9 superfamily member 2 isoform X2
103140610	0	-7.74353	nectin4	nectin-4 isoform X1
103142565	0	-7.46779	ptgfr	prostaglandin F2-alpha receptor
107835625	0	-7.42677	LOC107835625	glutamate-rich protein 6-like
103135526	0	-7.12527	rbm22	pre-mRNA-splicing factor RBM22
103137712	0	-6.87941	rnaseh2a	ribonuclease H2 subunit A isoform X3
103140208	0	-6.72264	llph	protein LLP homolog
103133557	0	-6.7201	LOC103133557	progonadoliberin-3-like
103148322	0	-6.63199	kiaa1614	uncharacterized protein KIAA1614 homolog isoform X1
103138063	0	-6.35428	sdr42e1	short-chain dehydrogenase/reductase family 42E member 1
103147242	0	-6.28059	prr7	proline-rich protein 7
103134488	0	-6.2337	LOC103134488	protein Wnt-7b isoform X3
103146416	0	-5.94878	LOC103146416	zinc transporter Slc39a7-like isoform X2
103153670	0	-5.91425	rrnad1	protein RRNAD1
103140522	0	-5.83798	phex	phosphate-regulating neutral endopeptidase isoform X3
103150169	0	-5.77504	cenpi	centromere protein I
103150049	0	-5.51714	capn3	calpain-3 isoform X1
103147671	0	-5.51456	LOC103147671	E3 ubiquitin-protein ligase DTX3L-like isoform X3
103148317	0	-5.43572	aire	autoimmune regulator isoform X3
103144798	0	-5.37378	LOC103144798	uncharacterized protein LOC103144798
103150175	0	-5.29765	bcorl1	BCL-6 corepressor-like protein 1 isoform X1
103140206	0	-5.28959	pex26	peroxisome assembly protein 26
103156362	0	-5.25171	LOC103156362	glycosyltransferase family 92 protein F13G3.3-like
103136050	0	-5.22269	dlgap2	disks large-associated protein 2 isoform X4
103144383	0	-5.19323	LOC103144383	neural-cadherin-like
103150571	0	-5.17776	tekt4	tektin-4 isoform X2
103152858	0	-5.14617	LOC103152858	collagen alpha-1(XXVIII) chain-like isoform X2
103140205	0	-5.0995	LOC103140205	ubl carboxyl-terminal hydrolase 18-like
103130573	0	-5.02583	LOC103130573	kinesin-like protein KIF26A isoform X1
103133031	0	-5.01841	elf4	ETS-related transcription factor Elf-4 isoform X2
103136823	0	-4.98457	LOC103136823	nectin-2-like
103155664	0	-4.9335	celsr3	cadherin EGF LAG seven-pass G-type receptor 3 isoform X2
103140991	0	-4.90164	LOC103140991	uncharacterized protein LOC103140991
103140346	0	-4.76224	gpr45	probable G-protein coupled receptor 45
103152629	0	-4.70893	LOC103152629	solute carrier family 12 member 2-like isoform X1
103130465	0	-4.60216	LOC103130465	B-cell receptor CD22-like
103147317	0	-4.58873	LOC103147317	histone-lysine N-methyltransferase SETMAR
103134314	0	-4.58663	evx2	homeobox even-skipped homolog protein 2 isoform X1
103135118	0	-4.5729	LOC103135118	RNA-binding protein 24
103150171	0	-4.51104	arl13a	ADP-ribosylation factor-like protein 13A isoform X2
103130802	0	-4.44837	pdhb	pyruvate dehydrogenase E1 component subunit beta, mitochondrial
103151378	0	-4.42584	LOC103151378	coiled-coil domain-containing protein 80-like
103144396	0	-4.40586	LOC103144396	dihydrofolate reductase-like
103150181	0	-4.3637	trmt12	tRNA wybutosine-synthesizing protein 2 homolog
103131619	0	-4.34986	nfatc3	nuclear factor of activated T-cells, cytoplasmic 3
103136491	0	-4.22849	ccsap	centriole, cilia and spindle-associated protein
103153390	0	-4.18813	rnd2	rho-related GTP-binding protein RhoN
103144188	0	-4.07567	LOC103144188	rho-related GTP-binding protein RhoU-like
103150174	0	-4.01712	cstf2	cleavage stimulation factor subunit 2
103154823	0	-4.01179	LOC103154823	unconventional myosin-XV-like
103130801	0	-3.84579	LOC103130801	uncharacterized protein LOC103130801 isoform X1
103130533	0	-3.79283	LOC103130533	polymeric immunoglobulin receptor-like
103139471	0	-3.63982	mrvi1	protein MRVI1
103145139	0	-3.62702	LOC103145139	LIM domain-binding protein 3-like isoform X2
103140378	0	-3.61993	rnaseh2b	ribonuclease H2 subunit B isoform X1
103135396	0	-3.49958	cbfa2t2	protein CBFA2T2
103152856	0	-3.40937	LOC103152856	septin-7 isoform X2
103129502	0	-3.39691	fstl1	follistatin-related protein 1
103136786	0	-3.36716	LOC103136786	tubulin beta chain
103142503	0	-3.34889	csnk2a2	casein kinase II subunit alpha\'
103130497	0	-3.27444	LOC103130497	leucine-rich repeat-containing protein 24-like isoform X2
103142505	0	-3.23353	LOC103142505	zinc finger protein 319-like
103139004	0	-3.1632	tas1r2	taste receptor type 1 member 2
103138053	0	-3.13555	kctd15	BTB/POZ domain-containing protein KCTD15 isoform X3
103148120	0	-3.0309	slc6a4	sodium-dependent serotonin transporter
103138949	0	-3.01112	LOC103138949	tumor necrosis factor receptor superfamily member 10B-like
103155652	0	-2.95594	slc26a6	solute carrier family 26 member 6 isoform X1
103150827	0	-2.94389	LOC103150827	C-type lectin domain family 4 member A-like
103143743	0	-2.8355	tyk2	non-receptor tyrosine-protein kinase TYK2
103133568	0	-2.78557	LOC103133568	C-terminal-binding protein 2-like isoform X3
103144394	0	-2.75914	LOC103144394	cryptochrome-1-like isoform X2
103139080	0	-2.73711	LOC103139080	YTH domain-containing family protein 1-like isoform X1
103152617	0	-2.71158	sncaip	synphilin-1
103156191	0	-2.70599	prkx	cAMP-dependent protein kinase catalytic subunit PRKX isoform X2
103156430	0	-2.63344	clu	clusterin
103136796	0	-2.632	LOC103136796	poliovirus receptor-like
103140154	0	-2.61745	arhgef6	rho guanine nucleotide exchange factor 6 isoform X1
103145119	0	-2.58271	LOC103145119	thrombospondin-2-like isoform X2
103143049	0	-2.57897	LOC103143049	chloride channel protein 2-like isoform X1
103136148	0	-2.56682	pomt2	protein O-mannosyl-transferase 2
103152441	0	-2.52987	snrnp48	U11/U12 small nuclear ribonucleoprotein 48 kDa protein
103131265	0	-2.51656	LOC103131265	ladderlectin-like
103144658	0	-2.5144	LOC103144658	tumor necrosis factor ligand superfamily member 10-like
103150064	0	-2.48693	LOC103150064	probable N-acetyltransferase camello
103154580	0	-2.46539	LOC103154580	CUB domain-containing protein 1-like
103139591	0	-2.46459	pcsk1	neuroendocrine convertase 1 isoform X2
103134722	0	-2.42483	LOC103134722	cyclic AMP receptor 4-like isoform X6
103145561	0	-2.36655	fchsd2	F-BAR and double SH3 domains protein 2 isoform X1
103139677	0	-2.21278	LOC103139677	extracellular calcium-sensing receptor-like isoform X2
103151440	0	-2.18539	LOC103151440	ankyrin repeat and fibronectin type-III domain-containing protein 1-like isoform X2
103145040	0	-2.14121	LOC103145040	cytosolic sulfotransferase 2-like
103153481	0	-2.11782	clcn6	chloride transport protein 6 isoform X1
103139602	0	-2.10963	taok1	serine/threonine-protein kinase TAO1
103152866	0	-2.09411	LOC103152866	von Willebrand factor D and EGF domain-containing protein-like
103134246	0	-2.08853	cog3	conserved oligomeric Golgi complex subunit 3
103135121	0	-2.03015	LOC103135121	exostosin-1b-like
103155743	0	-2.02245	nol8	nucleolar protein 8
103155657	0	-1.97892	LOC103155657	uncharacterized protein LOC103155657
103146489	0	-1.9721	smo	smoothened homolog
103146635	0	-1.96781	LOC103146635	zinc finger protein 638-like
103133366	0	-1.96018	LOC103133366	integrin alpha-L-like
103130803	0	-1.95936	pxk	PX domain-containing protein kinase-like protein isoform X1
103144046	0	-1.94768	LOC103144046	mitogen-activated protein kinase kinase kinase 12-like
103137505	0	-1.92218	capg	macrophage-capping protein isoform X1
103154331	0	-1.84336	pcmt1	protein-L-isoaspartate(D-aspartate) O-methyltransferase isoform X1
103156856	0	-1.82341	gart	trifunctional purine biosynthetic protein adenosine-3 isoform X1
103152397	0	-1.78184	ift81	intraflagellar transport protein 81 homolog
103130327	0	-1.75642	LOC103130327	UPF0568 protein C14orf166 homolog
103136512	0	-1.74716	tspan15	tetraspanin-15
103132641	0	-1.71263	LOC103132641	TRPM8 channel-associated factor homolog
103138083	0	-1.69862	rbl2	retinoblastoma-like protein 2 isoform X3
103130219	0	-1.69622	kiaa1524	protein CIP2A
103140287	0	-1.68936	myo16	unconventional myosin-XVI isoform X1
103146603	0	-1.66608	LOC103146603	calcium-binding protein 2-like
103147879	0	-1.62517	LOC103147879	gastrula zinc finger protein XlCGF26.1-like isoform X1
103144397	0	-1.62058	mterf2	transcription termination factor 2, mitochondrial
103136166	0	-1.61738	flvcr2	feline leukemia virus subgroup C receptor-related protein 2 isoform X2
103153391	0	-1.57621	vat1	synaptic vesicle membrane protein VAT-1 homolog
103140939	0	-1.57419	LOC103140939	dual specificity mitogen-activated protein kinase kinase 6-like
103152424	0	-1.53476	dnase2	deoxyribonuclease-2-alpha isoform X3
103129453	0	-1.52403	rgn	regucalcin
103155586	0	-1.50207	hes4	transcription factor HES-4 isoform X2
103145900	0	-1.45399	lipg	endothelial lipase
103155339	0	-1.44845	LOC103155339	kelch-like protein 10 isoform X1
103155356	0	-1.436	ninl	ninein-like protein
103138310	0	-1.40985	tmem43	transmembrane protein 43
103141194	0	-1.40433	LOC103141194	lymphoid-restricted membrane protein-like isoform X1
103140948	0	-1.37166	LOC103140948	protein HID1-like
103135607	0	-1.37145	LOC103135607	histone-lysine N-methyltransferase, H3 lysine-36 and H4 lysine-20 specific-like
103145225	0	-1.34785	LOC103145225	putative serine protease K12H4.7
103136848	0	-1.34401	LOC103136848	transmembrane emp24 domain-containing protein 9-like
103145894	0	-1.34282	arl15	ADP-ribosylation factor-like protein 15 isoform X2
103140362	0	-1.33129	rev1	DNA repair protein REV1
103152234	0	-1.32732	LOC103152234	LIM domain-binding protein 1-like isoform X3
103134264	0	-1.32531	LOC103134264	ras-related protein Rap-2a
103137912	0	-1.3221	p4htm	transmembrane prolyl 4-hydroxylase isoform X1
103131945	0	-1.32034	gemin6	gem-associated protein 6
103142945	0	-1.31706	LOC103142945	zinc finger protein 583-like isoform X4
103149744	0	-1.31363	LOC103149744	uncharacterized protein LOC103149744 isoform X1
103152258	0	-1.28684	LOC103152258	phosphatidylserine synthase 1
103138891	0	-1.28074	mlycd	malonyl-CoA decarboxylase, mitochondrial
103129360	0	-1.27519	sccpdh	saccharopine dehydrogenase-like oxidoreductase isoform X1
103149483	0	-1.26963	aox1	aldehyde oxidase isoform X2
103145574	0	-1.23882	bcap29	B-cell receptor-associated protein 29 isoform X2
103144763	0	-1.21322	zfyve26	zinc finger FYVE domain-containing protein 26
103149519	0	-1.20299	hs2st1	heparan sulfate 2-O-sulfotransferase 1
103150929	0	-1.18234	LOC103150929	inhibin beta B chain-like
103134206	0	-1.1758	dopey2	protein dopey-2 isoform X2
103149256	0	-1.17435	pdxdc1	pyridoxal-dependent decarboxylase domain-containing protein 1
103151496	0	-1.1716	zbtb49	zinc finger and BTB domain-containing protein 49
103145136	0	-1.17131	LOC103145136	glutamate dehydrogenase, mitochondrial
103154706	0	-1.16472	ptpn21	tyrosine-protein phosphatase non-receptor type 21 isoform X1
103151585	0	-1.15316	sf3b4	splicing factor 3B subunit 4
103141826	0	-1.15165	LOC103141826	serine/threonine-protein kinase PAK 3 isoform X1
103150295	0	-1.14439	LOC103150295	nicotinamide phosphoribosyltransferase-like isoform X2
103152615	0	-1.13366	LOC103152615	discoidin domain-containing receptor 2-like isoform X1
103138887	0	-1.12144	LOC103138887	monocarboxylate transporter 13-like isoform X2
103149337	0	-1.09414	LOC103149337	bone morphogenetic protein receptor type-1B-like
103133458	0	-1.07966	LOC103133458	zinc finger protein OZF-like
103152436	0	-1.05811	plekhf2	pleckstrin homology domain-containing family F member 2
103145272	0	-1.05722	LOC103145272	chromobox protein homolog 3 isoform X1
103148596	0	-1.04371	LOC103148596	V-type proton ATPase 116 kDa subunit a-like
103150941	0	-1.03177	xdh	xanthine dehydrogenase/oxidase
103143617	0	-1.0313	LOC103143617	trinucleotide repeat-containing gene 6B protein-like isoform X1
103147464	0	-1.01659	LOC103147464	zinc-binding protein A33-like
103140319	0	-1.0072	cep97	centrosomal protein of 97 kDa
103147460	0	-0.97392	LOC103147460	zinc finger protein 668-like isoform X3
103144933	0	-0.971745	ifi35	interferon-induced 35 kDa protein
103144479	0	-0.953495	LOC103144479	sorting nexin-27-like
103144415	0	-0.93208	ush1c	harmonin isoform X1
103150495	0	-0.927228	LOC103150495	protein O-GlcNAcase-like
103140565	0	-0.913366	yme1l1	ATP-dependent zinc metalloprotease YME1L1 isoform X1
103152322	0	-0.90839	LOC103152322	peptidyl-glycine alpha-amidating monooxygenase-like
103141524	0	-0.894671	rragc	ras-related GTP-binding protein C
103139830	0	-0.89397	LOC103139830	uridine-cytidine kinase 2-A-like
103147649	0	-0.882104	LOC103147649	patatin-like phospholipase domain-containing protein 7
103140103	0	-0.870766	LOC103140103	ubiquitin-like protein 3
103145367	0	-0.861298	siae	sialate O-acetylesterase
103152838	0	-0.857921	LOC103152838	secretory carrier-associated membrane protein 2-like
103155719	0	-0.832604	LOC103155719	kelch-like protein 11
103138816	0	-0.820555	LOC103138816	transmembrane protein 189-like
103134575	0	-0.820318	LOC103134575	putative helicase mov-10-B.1 isoform X1
103149822	0	-0.817442	map2k2	dual specificity mitogen-activated protein kinase kinase 2
103149413	0	-0.815207	LOC103149413	dystrophin-like isoform X6
103131977	0	-0.800391	cherp	calcium homeostasis endoplasmic reticulum protein isoform X2
103136794	0	-0.7999	abhd16a	protein ABHD16A
103155849	0	-0.777922	fdx1	adrenodoxin, mitochondrial
103151712	0	-0.760041	LOC103151712	interferon regulatory factor 2-like isoform X1
103134961	0	-0.746992	fbxo21	F-box only protein 21
103137008	0	-0.744336	oxr1	oxidation resistance protein 1 isoform X5
103136572	0	-0.732369	mvd	diphosphomevalonate decarboxylase
103152242	0	-0.716312	zdhhc16	probable palmitoyltransferase ZDHHC16
103136735	0	-0.70936	iffo1	intermediate filament family orphan 1 isoform X1
103135577	0	-0.707477	atrx	transcriptional regulator ATRX
103134564	0	-0.703369	LOC103134564	proto-oncogene tyrosine-protein kinase Src isoform X2
103136876	0	-0.686955	atg2a	autophagy-related protein 2 homolog A
103156870	0	-0.6607	kmt2c	histone-lysine N-methyltransferase 2C isoform X4
103135967	0	-0.65917	cpeb1	cytoplasmic polyadenylation element-binding protein 1 isoform X3
103144926	0	-0.647493	LOC103144926	apolipoprotein L2-like
103131346	0	-0.645222	psmc5	26S protease regulatory subunit 8
103153136	0	-0.635581	LOC103153136	E3 ubiquitin/ISG15 ligase TRIM25-like
103147239	0	-0.617484	col1a1	collagen alpha-1(I) chain isoform X1
103135053	0	-0.600691	LOC103135053	uncharacterized protein LOC103135053
103148569	0	-0.598407	cc2d1b	coiled-coil and C2 domain-containing protein 1B
103135569	0	-0.578513	rlim	E3 ubiquitin-protein ligase RLIM isoform X1
103153080	0	-0.573116	LOC103153080	F-box/LRR-repeat protein 19-like
103145056	0	-0.563334	LOC103145056	embryonic polyadenylate-binding protein-like isoform X4
103142159	0	-0.563052	tlk2	serine/threonine-protein kinase tousled-like 2 isoform X3
103147422	0	-0.555239	ndufab1	acyl carrier protein, mitochondrial
103129764	0	-0.546671	ncapd3	condensin-2 complex subunit D3 isoform X2
103152349	0	-0.540173	LOC103152349	ataxin-2-like protein isoform X2
103133878	0	-0.532997	stip1	stress-induced-phosphoprotein 1
103144264	0	-0.489523	tpp1	tripeptidyl-peptidase 1
103146850	0	-0.487255	LOC103146850	uncharacterized protein LOC103146850
103143281	0	-0.483073	LOC103143281	1-acylglycerol-3-phosphate O-acyltransferase ABHD5-like
103134730	0	-0.465785	mycbp2	E3 ubiquitin-protein ligase MYCBP2 isoform X1
103146205	0	-0.462015	pclo	protein piccolo isoform X3
103152357	0	-0.449338	LOC103152357	protein PAT1 homolog 2
103134364	0	-0.427014	LOC103134364	PR domain zinc finger protein 1-like
103149642	0	-0.403914	uba1	ubiquitin-like modifier-activating enzyme 1
103147566	0	-0.393054	cdk13	cyclin-dependent kinase 13
103148299	0	-0.365613	LOC103148299	formin-like protein 3
103130839	0	-0.360791	LOC103130839	glucose-6-phosphate isomerase-like
103134532	0	-0.338201	LOC103134532	sorting nexin-1-like
103138203	0	-0.30696	LOC103138203	protein B4-like isoform X1
103146566	0	0.312183	bag4	BAG family molecular chaperone regulator 4 isoform X2
103148298	0	0.334406	LOC103148298	vegetative cell wall protein gp1-like isoform X2
103136367	0	0.395041	LOC103136367	actin, cytoplasmic 2
103155161	0	0.46785	hmha1	minor histocompatibility protein HA-1 isoform X1
103136186	0	0.509841	LOC103136186	uncharacterized protein LOC103136186 isoform X1
103139262	0	0.548278	phldb3	pleckstrin homology-like domain family B member 3 isoform X2
103133657	0	0.568265	man2a2	alpha-mannosidase 2x isoform X2
103148246	0	0.571738	mcmbp	mini-chromosome maintenance complex-binding protein
103150253	0	0.584413	caprin1	caprin-1 isoform X3
103148819	0	0.591763	mcm3	DNA replication licensing factor MCM3
103147362	0	0.607005	trpc4ap	short transient receptor potential channel 4-associated protein
103129575	0	0.622144	cdk2	cyclin-dependent kinase 2
103135374	0	0.62247	ndc80	kinetochore protein NDC80 homolog isoform X1
103141025	0	0.622956	LOC103141025	interferon regulatory factor 2-binding protein 1-like
103148263	0	0.637922	ide	insulin-degrading enzyme isoform X2
103156569	0	0.660027	pik3c2a	phosphatidylinositol 4-phosphate 3-kinase C2 domain-containing subunit alpha
103135727	0	0.663593	egfr	epidermal growth factor receptor
103156042	0	0.676826	LOC103156042	guanine nucleotide-binding protein G(s) subunit alpha
103149518	0	0.67814	LOC103149518	15 kDa selenoprotein
103148591	0	0.683949	LOC103148591	heterogeneous nuclear ribonucleoprotein C-like isoform X1
103139973	0	0.698022	LOC103139973	uncharacterized protein LOC103139973 isoform X1
103150738	0	0.730475	sltm	SAFB-like transcription modulator
103143220	0	0.768253	eefsec	selenocysteine-specific elongation factor isoform X1
103151785	0	0.775453	LOC103151785	sorting and assembly machinery component 50 homolog A-like
103140884	0	0.777476	LOC103140884	uncharacterized protein LOC103140884 isoform X2
103148476	0	0.798216	LOC103148476	cyclin-dependent kinase 4 inhibitor B-like
103150711	0	0.803926	LOC103150711	guanine nucleotide-binding protein G(i) subunit alpha-2-like isoform X1
103133903	0	0.816797	kif4a	chromosome-associated kinesin KIF4A
103130452	0	0.820167	LOC103130452	LIM domain and actin-binding protein 1-like isoform X1
103134946	0	0.822742	vsig10	V-set and immunoglobulin domain-containing protein 10 isoform X1
103146320	0	0.82463	ndufv2	NADH dehydrogenase
103138508	0	0.845719	cope	coatomer subunit epsilon
103152084	0	0.884059	LOC103152084	activin receptor type-2A-like isoform X1
103155190	0	0.884925	mettl16	methyltransferase-like protein 16 isoform X1
103145787	0	0.937173	chchd4	mitochondrial intermembrane space import and assembly protein 40
103148682	0	0.945543	lancl1	lanC-like protein 1
103150918	0	0.960502	LOC103150918	arf-GAP with coiled-coil, ANK repeat and PH domain-containing protein 3-like
103130351	0	0.967998	LOC103130351	adenomatous polyposis coli homolog
103131947	0	0.983506	sos1	son of sevenless homolog 1 isoform X2
103129815	0	1.0035	LOC103129815	thioredoxin domain-containing protein 15-like
103149523	0	1.02293	znf326	DBIRD complex subunit ZNF326 isoform X1
103134356	0	1.0336	prep	prolyl endopeptidase
103130496	0	1.03538	sass6	spindle assembly abnormal protein 6 homolog isoform X1
103155508	0	1.04718	ell	RNA polymerase II elongation factor ELL
103134995	0	1.07953	LOC103134995	zinc finger protein 432-like
103152829	0	1.08176	LOC103152829	apoptosis-enhancing nuclease
103154210	0	1.09124	kiaa1109	uncharacterized protein KIAA1109 homolog, partial
103141345	0	1.10041	golga3	golgin subfamily A member 3 isoform X2
103129248	0	1.14092	LOC103129248	P3 protein-like
103133449	0	1.15216	psmb3	proteasome subunit beta type-3
103146334	0	1.15817	rph3a	rabphilin-3A isoform X2
103150393	0	1.16019	hdac9	histone deacetylase 9 isoform X1
103138576	0	1.19564	rbm27	RNA-binding protein 27
103142796	0	1.20818	LOC103142796	protein S100-A7-like
103151890	0	1.21267	setd4	SET domain-containing protein 4 isoform X2
103154773	0	1.21995	LOC103154773	fibroblast growth factor receptor-like 1
103134647	0	1.22076	eif4g3	eukaryotic translation initiation factor 4 gamma 3 isoform X16
103143572	0	1.22563	zrsr2	U2 small nuclear ribonucleoprotein auxiliary factor 35 kDa subunit-related protein 2 isoform X1
103145786	0	1.24758	LOC103145786	protein transport protein Sec61 subunit alpha-like 1
103148889	0	1.28104	dgcr2	integral membrane protein DGCR2/IDD isoform X2
103153598	0	1.30428	dok1	docking protein 1
103129553	0	1.31484	dusp16	dual specificity protein phosphatase 16 isoform X1
103153515	0	1.31692	LOC103153515	double-stranded RNA-specific editase 1-like isoform X1
103154113	0	1.33026	LOC103154113	zinc finger protein 513-like
103138884	0	1.33351	ndufa9	NADH dehydrogenase
103156987	0	1.34935	LOC103156987	dapper homolog 2-like isoform X2
103147544	0	1.35736	dnajc13	dnaJ homolog subfamily C member 13 isoform X7
103154045	0	1.36016	LOC103154045	ATP-binding cassette sub-family C member 9 isoform X1
103153942	0	1.37317	ntmt1	N-terminal Xaa-Pro-Lys N-methyltransferase 1
103149939	0	1.38225	ttll4	tubulin polyglutamylase TTLL4
103136448	0	1.38331	LOC103136448	MICAL-like protein 2
103139373	0	1.39804	ercc5	DNA repair protein complementing XP-G cells
103136790	0	1.46356	LOC103136790	1-phosphatidylinositol 4,5-bisphosphate phosphodiesterase eta-2-like
103147052	0	1.48905	htra1	serine protease HTRA1
103136472	0	1.49124	LOC103136472	coiled-coil domain-containing protein 63-like isoform X1
103130790	0	1.49341	hgh1	protein HGH1 homolog isoform X1
103131502	0	1.51867	auh	methylglutaconyl-CoA hydratase, mitochondrial isoform X1
103145370	0	1.52739	tsku	tsukushin
103141442	0	1.53471	msl3	male-specific lethal 3 homolog isoform X1
103154111	0	1.54883	ephx2	bifunctional epoxide hydrolase 2 isoform X1
103149437	0	1.57679	usp16	ubiquitin carboxyl-terminal hydrolase 16 isoform X1
103142523	0	1.60806	ccdc73	coiled-coil domain-containing protein 73 isoform X1
103156733	0	1.61217	pphln1	periphilin-1 isoform X1
103130299	0	1.70854	atad3a	ATPase family AAA domain-containing protein 3A
103143629	0	1.74266	mei1	meiosis inhibitor protein 1 isoform X1
103148529	0	1.76348	proca1	protein PROCA1
103130138	0	1.79242	scly	selenocysteine lyase
103148277	0	1.79605	kmo	kynurenine 3-monooxygenase
103145115	0	1.81474	LOC103145115	receptor-type tyrosine-protein phosphatase epsilon-like isoform X1
103142494	0	1.83625	tcp11l1	T-complex protein 11-like protein 1
103141171	0	1.93256	LOC103141171	probable E3 ubiquitin-protein ligase DTX3 isoform X2
103131575	0	2.0263	LOC103131575	gastrula zinc finger protein XlCGF8.2DB-like, partial
103141087	0	2.09544	msantd2	myb/SANT-like DNA-binding domain-containing protein 2 isoform X2
103129255	0	2.10963	spata2l	spermatogenesis-associated protein 2-like protein
103137879	0	2.15541	mettl14	N6-adenosine-methyltransferase subunit METTL14
103141580	0	2.18317	cadm4	cell adhesion molecule 4 isoform X1
103134809	0	2.24035	fam124a	protein FAM124A isoform X2
103140073	0	2.26678	LOC103140073	deoxyribodipyrimidine photo-lyase-like
103143813	0	2.40451	LOC103143813	interferon-induced protein 44-like isoform X3
103152417	0	2.41216	LOC103152417	vesicle-associated membrane protein 8-like
103147965	0	2.70995	LOC103147965	zinc finger protein 2-like
103144109	0	2.78213	itsn2	intersectin-2 isoform X1
103135603	0	2.83795	LOC103135603	serine/threonine-protein phosphatase 2A catalytic subunit beta isoform-like
103154057	0	2.84318	sh3tc2	SH3 domain and tetratricopeptide repeat-containing protein 2 isoform X1
103145325	0	2.95438	cdk5r2	cyclin-dependent kinase 5 activator 2
103140253	0	3.22095	LOC103140253	transcription termination factor 2, mitochondrial-like isoform X1
103153180	0	3.27339	dnah5	dynein heavy chain 5, axonemal
103132931	0	3.31612	LOC103132931	multidrug and toxin extrusion protein 1 isoform X2
103138378	0	3.335	LOC103138378	serine/threonine-protein kinase OSR1-like
103140012	0	3.37274	lrp8	low-density lipoprotein receptor-related protein 8 isoform X2
103134728	0	3.52996	slain1	SLAIN motif-containing protein 1
103133147	0	3.57889	LOC103133147	cat eye syndrome critical region protein 5-like
103132525	0	3.57949	LOC103132525	inactive rhomboid protein 1-like, partial
103152652	0	3.72628	LOC103152652	gastrula zinc finger protein XlCGF26.1-like isoform X2
103146214	0	3.79502	mettl25	methyltransferase-like protein 25 isoform X1
103149486	0	3.80963	LOC103149486	cell adhesion molecule 2-like isoform X1
103149937	0	3.8165	LOC103149937	uncharacterized protein LOC103149937
103151453	0	3.83555	LOC103151453	neurogenic locus notch homolog protein 1
103155487	0	3.99013	prmt2	protein arginine N-methyltransferase 2 isoform X1
103152671	0	3.99214	LOC103152671	gastrula zinc finger protein xFG20-1-like
103150072	0	4.03652	loxl3	lysyl oxidase homolog 3 isoform X3
103137816	0	4.13411	acsl1	long-chain-fatty-acid--CoA ligase 1 isoform X1
103150084	0	4.53157	ganc	neutral alpha-glucosidase C isoform X2
103135206	0	4.59961	necab1	N-terminal EF-hand calcium-binding protein 1
103149016	0	4.65754	slc22a15	solute carrier family 22 member 15 isoform X1
103145593	0	4.65939	vtn	vitronectin isoform X1
103135933	0	4.66195	LOC103135933	proteinase-activated receptor 2
103138377	0	4.80016	LOC103138377	solute carrier family 22 member 13-like
103152078	0	4.80314	LOC103152078	bone morphogenetic protein receptor type-2-like
103142535	0	4.82641	LOC103142535	procollagen galactosyltransferase 2-like
103154186	0	4.96228	LOC103154186	calpain-A-like
103145810	0	5.0654	LOC103145810	opioid growth factor receptor-like
103138416	0	5.32935	LOC103138416	BMP/retinoic acid-inducible neural-specific protein 3-like
103134301	0	5.39855	LOC103134301	uncharacterized protein LOC103134301
103138346	0	5.73864	LOC103138346	BMP/retinoic acid-inducible neural-specific protein 3-like
103151742	0	5.75646	ppia	peptidyl-prolyl cis-trans isomerase A
103141531	0	5.84397	myom3	myomesin-3 isoform X1
103145683	0	6.60197	LOC103145683	LRRN4 C-terminal-like protein
103146765	0	7.87029	LOC103146765	cytochrome P450 2K1-like
103151634	0	8.85907	LOC103151634	endonuclease domain-containing 1 protein-like
103150304	0	9.07503	meox2	homeobox protein MOX-2
103143207	0	9.25493	LOC103143207	oxytocin receptor-like
103135431	0	9.52371	plk2	serine/threonine-protein kinase PLK2
103152685	0	10.2351	LOC103152685	uncharacterized protein LOC103152685
103153924	0	10.2565	LOC103153924	LOW QUALITY PROTEIN: poly
103153908	0	10.4414	LOC103153908	poly
103144416	0	10.8384	ccdc77	coiled-coil domain-containing protein 77
103143209	0	11.0232	LOC103143209	von Hippel-Lindau disease tumor suppressor-like
103131703	0	11.1821	acer3	alkaline ceramidase 3
103144602	0	12.3499	LOC103144602	myeloid-associated differentiation marker homolog
103130300	0	13.1594	ssu72	RNA polymerase II subunit A C-terminal domain phosphatase SSU72
103152687	0	13.8094	nploc4	nuclear protein localization protein 4 homolog
103142373	-14.3019	0	ctps1	CTP synthase 1
103143656	-13.5045	0	LOC103143656	uncharacterized protein LOC103143656 isoform X1
103131459	-13.3794	0	LOC103131459	CTD small phosphatase-like protein 2-A isoform X2
103151028	-13.2241	0	denr	density-regulated protein isoform X3
103155973	-12.9176	0	b4galt1	beta-1,4-galactosyltransferase 1
103155972	-12.6662	0	exosc3	exosome complex component RRP40
103137351	-12.5104	0	LOC103137351	alcohol dehydrogenase class-3-like
103142417	-12.4349	0	anln	actin-binding protein anillin
103155988	-11.8573	0	LOC103155988	heterogeneous nuclear ribonucleoprotein A0-like
103132424	-11.8541	0	LOC103132424	polyadenylate-binding protein-interacting protein 2
103132805	-11.7915	0	LOC103132805	uncharacterized protein LOC103132805, partial
103141655	-11.5865	0	rps2	40S ribosomal protein S2
103142397	-11.5429	0	ngly1	peptide-N(4)-(N-acetyl-beta-glucosaminyl)asparagine amidase isoform X4
103131222	-11.4539	0	tbc1d9b	TBC1 domain family member 9B isoform X2
103142408	-11.4532	0	rpa3	replication protein A 14 kDa subunit
103155974	-11.1345	0	rest	RE1-silencing transcription factor
103156432	-10.9194	0	LOC103156432	phosphomannomutase 2-like
103130096	-10.813	0	LOC103130096	histone-lysine N-methyltransferase SETDB2
103156129	-10.7814	0	LOC103156129	transcriptional regulator Myc-B-like
103141313	-10.7016	0	athl1	acid trehalase-like protein 1
103131288	-10.6776	0	LOC103131288	choline transporter-like protein 1
103131287	-10.6764	0	LOC103131287	neurogenin-1-like
103142392	-10.587	0	LOC103142392	60S ribosomal protein L15
103137352	-10.4916	0	gar1	H/ACA ribonucleoprotein complex subunit 1
103141613	-10.3822	0	dxo	decapping and exoribonuclease protein
103154871	-10.2008	0	LOC103154871	gamma-crystallin N-B
107836908	-10.163	0	umad1	UBAP1-MVB12-associated (UMA)-domain containing protein 1
103146426	-10.0585	0	LOC103146426	coiled-coil domain-containing protein 106-like
103130326	-9.99562	0	sap18	histone deacetylase complex subunit SAP18
103144636	-9.99555	0	LOC103144636	E3 ubiquitin-protein ligase TRIM39-like
103140963	-9.9206	0	LOC103140963	synaptogyrin-2-like
103131217	-9.88552	0	LOC103131217	mitochondrial inner membrane protein COX18 isoform X1
103142678	-9.86158	0	hddc3	guanosine-3\',5\'-bis(diphosphate) 3\'-pyrophosphohydrolase MESH1
103140869	-9.70909	0	erp44	endoplasmic reticulum resident protein 44
103131216	-9.55251	0	LOC103131216	selenoprotein T2-like
103131814	-9.1274	0	LOC103131814	butyrophilin subfamily 3 member A2-like
103143314	-9.04251	0	LOC103143314	coagulation factor XI-like
103155999	-9.04212	0	fgfrl1	fibroblast growth factor receptor-like 1 isoform X1
103131209	-8.94528	0	nfkb1	LOW QUALITY PROTEIN: nuclear factor NF-kappa-B p105 subunit
103131218	-8.93896	0	rnf4	E3 ubiquitin-protein ligase RNF4
103149178	-8.88296	0	rasl12	ras-like protein family member 12 isoform X2
103137357	-8.86272	0	lingo2	leucine-rich repeat and immunoglobulin-like domain-containing nogo receptor-interacting protein 2
103133583	-8.80081	0	LOC103133583	THAP domain-containing protein 6-like
103155997	-8.34179	0	LOC103155997	E3 ubiquitin-protein ligase RNF130-like
103155991	-8.33086	0	fam13b	protein FAM13B isoform X7
103130577	-8.30666	0	LOC103130577	lysophospholipid acyltransferase 2-like
103151292	-7.99732	0	LOC103151292	zinc finger protein 420-like
103135256	-7.92895	0	LOC103135256	retinol dehydrogenase 12-like
103131285	-7.89152	0	tbc1d2	TBC1 domain family member 2A isoform X1
103141285	-7.67869	0	rapsn	43 kDa receptor-associated protein of the synapse
103144899	-7.53752	0	LOC103144899	uncharacterized protein LOC103144899 isoform X4
103138035	-7.53728	0	LOC103138035	putative acyl-coenzyme A thioesterase 6, partial
103146067	-7.53315	0	LOC103146067	retinal homeobox protein Rx2-like
103155990	-7.36581	0	LOC103155990	kelch-like protein 3 isoform X1
103149938	-6.94855	0	LOC103149938	5\'-AMP-activated protein kinase subunit gamma-1-like isoform X2
103141964	-6.87615	0	ppil3	peptidyl-prolyl cis-trans isomerase-like 3
103146429	-6.54805	0	LOC103146429	uncharacterized protein LOC103146429
103148757	-6.49603	0	LOC103148757	uncharacterized protein LOC103148757
103142396	-6.48311	0	top2b	DNA topoisomerase 2-beta isoform X1
103135354	-6.36324	0	gcnt1	beta-1,3-galactosyl-O-glycosyl-glycoprotein beta-1,6-N-acetylglucosaminyltransferase
103140870	-6.36205	0	stx17	syntaxin-17
103153921	-6.02342	0	ttn	titin
103145464	-5.99559	0	rtkn	rhotekin isoform X1
103136040	-5.71723	0	LOC103136040	integrin alpha-7 isoform X1
103149716	-5.70491	0	LOC103149716	angiopoietin-related protein 7-like
103136177	-5.63255	0	ttc8	tetratricopeptide repeat protein 8 isoform X2
103139251	-5.51571	0	lsr	lipolysis-stimulated lipoprotein receptor isoform X1
103137771	-5.51035	0	tomm6	mitochondrial import receptor subunit TOM6 homolog
103137670	-5.32305	0	gpatch11	G patch domain-containing protein 11
103139159	-5.30591	0	LOC103139159	membrane cofactor protein-like
103155911	-5.28591	0	LOC103155911	serine/arginine repetitive matrix protein 2-like isoform X2
103136517	-5.28455	0	vps26a	vacuolar protein sorting-associated protein 26A
103135848	-5.28443	0	s100z	protein S100-Z isoform X1
103143330	-5.24973	0	col9a2	collagen alpha-2(IX) chain
103132422	-5.18982	0	LOC103132422	matrin-3-like isoform X1
103129193	-4.99355	0	LOC103129193	induced myeloid leukemia cell differentiation protein Mcl-1 homolog
103144940	-4.97116	0	LOC103144940	liprin-alpha-3-like isoform X3
103153473	-4.94583	0	vps13d	LOW QUALITY PROTEIN: vacuolar protein sorting-associated protein 13D
103156169	-4.82954	0	scfd1	sec1 family domain-containing protein 1
103153916	-4.79542	0	LOC103153916	interferon alpha/beta receptor 2-like isoform X1
103130859	-4.759	0	LOC103130859	poly
103130102	-4.70147	0	LOC103130102	coagulation factor VII-like
103134048	-4.69635	0	LOC103134048	urokinase-type plasminogen activator
103136128	-4.66353	0	LOC103136128	KATNB1-like protein 1
103135893	-4.60097	0	nsa2	ribosome biogenesis protein NSA2 homolog
103134328	-4.58427	0	grik2	glutamate receptor ionotropic, kainate 2 isoform X1
103137635	-4.55994	0	ablim1	actin-binding LIM protein 1 isoform X13
103154899	-4.40812	0	hal	histidine ammonia-lyase
103134994	-4.40217	0	LOC103134994	granulins-like
103149629	-4.3741	0	lgr6	leucine-rich repeat-containing G-protein coupled receptor 6 isoform X2
103139545	-4.35989	0	kiaa1024	UPF0258 protein KIAA1024 homolog
103148192	-4.29794	0	LOC103148192	ras-related protein Rab-7L1
103154126	-4.27737	0	dnpep	aspartyl aminopeptidase isoform X1
103150903	-4.25997	0	LOC103150903	P2Y purinoceptor 14-like
103136015	-3.98087	0	LOC103136015	protein phosphatase 1 regulatory subunit 1A
103143811	-3.95201	0	LOC103143811	collagen alpha-1(XI) chain-like isoform X1
103132674	-3.88843	0	LOC103132674	uncharacterized protein LOC103132674, partial
103139336	-3.84145	0	cdh15	cadherin-15
103146978	-3.82709	0	impad1	inositol monophosphatase 3
103137551	-3.73155	0	stim2	stromal interaction molecule 2 isoform X2
103152151	-3.71675	0	LOC103152151	kelch-like protein 9
103130915	-3.70553	0	LOC103130915	zinc finger protein 281-like
103146993	-3.68787	0	LOC103146993	tripartite motif-containing protein 16-like
103151880	-3.68228	0	kntc1	kinetochore-associated protein 1
103143117	-3.63125	0	LOC103143117	cytohesin-3
103136288	-3.53977	0	LOC103136288	bone morphogenetic protein 2-like
103139162	-3.42593	0	LOC103139162	complement factor H-like isoform X6
103155596	-3.41102	0	LOC103155596	pre-mRNA-splicing factor cwc25-like isoform X3
103136886	-3.40701	0	macrod1	O-acetyl-ADP-ribose deacetylase MACROD1 isoform X3
103146421	-3.37366	0	LOC103146421	epsin-1-like isoform X1
103141046	-3.36729	0	psma2	proteasome subunit alpha type-2
103135034	-3.21596	0	galnt12	polypeptide N-acetylgalactosaminyltransferase 12
103149539	-3.20271	0	gadd45a	growth arrest and DNA damage-inducible protein GADD45 alpha isoform X1
103146427	-3.19116	0	LOC103146427	CCR4-NOT transcription complex subunit 3-like
103147579	-3.19037	0	LOC103147579	transcription intermediary factor 1-alpha-like
103151356	-3.18296	0	lsm2	U6 snRNA-associated Sm-like protein LSm2
103149341	-3.15951	0	LOC103149341	PI-PLC X domain-containing protein 1-like
103152999	-3.15379	0	LOC103152999	uncharacterized protein LOC103152999
107838318	-3.13217	0	LOC107838318	gastrula zinc finger protein XlCGF57.1-like
103138878	-3.1291	0	atp6v1e1	LOW QUALITY PROTEIN: V-type proton ATPase subunit E 1
103129565	-3.11036	0	LOC103129565	protein-methionine sulfoxide oxidase mical3b-like isoform X1
103153485	-3.09503	0	LOC103153485	macrophage mannose receptor 1-like
103145385	-3.09078	0	LOC103145385	sodium- and chloride-dependent GABA transporter 2-like
103133584	-3.05302	0	cog2	conserved oligomeric Golgi complex subunit 2 isoform X1
103138337	-3.05005	0	atg7	ubiquitin-like modifier-activating enzyme ATG7
103139230	-3.00527	0	LOC103139230	oocyte zinc finger protein XlCOF6
103133852	-2.99611	0	LOC103133852	flotillin-2a isoform X2
103130097	-2.99063	0	creg1	protein CREG1
103139227	-2.98281	0	megf8	multiple epidermal growth factor-like domains protein 8
103156236	-2.97707	0	LOC103156236	tyrosine-protein phosphatase non-receptor type 7
103134835	-2.96309	0	LOC103134835	nebulin-like isoform X3
103145844	-2.94944	0	disp3	protein dispatched homolog 3 isoform X2
103138243	-2.86296	0	kctd14	BTB/POZ domain-containing protein KCTD14
103155965	-2.86219	0	LOC103155965	protein NipSnap homolog 3B-like
103150906	-2.85555	0	gpr171	probable G-protein coupled receptor 171 isoform X1
103152802	-2.83336	0	LOC103152802	substance-P receptor
103134552	-2.81892	0	smarcd1	SWI/SNF-related matrix-associated actin-dependent regulator of chromatin subfamily D member 1
103153101	-2.81216	0	LOC103153101	myosin phosphatase Rho-interacting protein-like
103151759	-2.80935	0	LOC103151759	zinc finger FYVE domain-containing protein 16
103130785	-2.80085	0	LOC103130785	LOW QUALITY PROTEIN: mastermind-like protein 1
103135892	-2.78948	0	gfm2	ribosome-releasing factor 2, mitochondrial isoform X1
103151643	-2.77964	0	ttc29	tetratricopeptide repeat protein 29 isoform X1
103141504	-2.77832	0	agpat3	1-acyl-sn-glycerol-3-phosphate acyltransferase gamma isoform X2
103130725	-2.75834	0	sh3bp2	SH3 domain-binding protein 2 isoform X1
103131636	-2.73351	0	LOC103131636	uncharacterized protein LOC103131636 isoform X3
103142405	-2.6865	0	sdhaf3	succinate dehydrogenase assembly factor 3, mitochondrial
103135407	-2.66322	0	grid2	glutamate receptor ionotropic, delta-2 isoform X1
103151644	-2.62082	0	slc10a7	sodium/bile acid cotransporter 7 isoform X2
103137778	-2.58948	0	LOC103137778	ubiquinol-cytochrome-c reductase complex assembly factor 2
103146242	-2.58128	0	fam3c	protein FAM3C isoform X2
103132285	-2.57545	0	LOC103132285	oocyte zinc finger protein XlCOF8.4-like isoform X2
103131614	-2.55519	0	slc7a10	asc-type amino acid transporter 1 isoform X1
103137977	-2.54972	0	LOC103137977	hyaluronidase-2-like isoform X1
103129455	-2.54673	0	LOC103129455	serum deprivation-response protein-like
103135895	-2.53902	0	LOC103135895	torsin-1A-like isoform X2
103152016	-2.51155	0	tbkbp1	TANK-binding kinase 1-binding protein 1
103135693	-2.51103	0	atp6v1h	V-type proton ATPase subunit H isoform X2
103137089	-2.49048	0	LOC103137089	laminin subunit alpha-3-like isoform X1
103142436	-2.45035	0	coq9	ubiquinone biosynthesis protein COQ9, mitochondrial
103129336	-2.41584	0	LOC103129336	butyrophilin-like protein 2
103154146	-2.41442	0	LOC103154146	long-chain fatty acid transport protein 1-like
103137746	-2.37743	0	sirt4	NAD-dependent protein lipoamidase sirtuin-4, mitochondrial isoform X1
103130160	-2.3404	0	LOC103130160	partitioning defective 6 homolog alpha-like isoform X2
103135018	-2.30954	0	LOC103135018	uncharacterized protein LOC103135018 isoform X2
103131773	-2.29432	0	LOC103131773	gastrula zinc finger protein XlCGF42.1-like
103131462	-2.26685	0	galk2	N-acetylgalactosamine kinase
103134899	-2.2016	0	paqr3	progestin and adipoQ receptor family member 3 isoform X3
103138428	-2.15076	0	tgm1	protein-glutamine gamma-glutamyltransferase K
103132921	-2.14989	0	LOC103132921	high-affinity choline transporter 1-like
103136984	-2.13897	0	vps13b	vacuolar protein sorting-associated protein 13B isoform X1
103143321	-2.13327	0	dlgap3	disks large-associated protein 3 isoform X3
103137272	-2.09884	0	LOC103137272	guanine nucleotide-binding protein G(i) subunit alpha-2
103142437	-2.09838	0	ciapin1	anamorsin isoform X1
103148043	-2.09621	0	plcb1	1-phosphatidylinositol 4,5-bisphosphate phosphodiesterase beta-1 isoform X2
103153752	-2.09114	0	depdc1	DEP domain-containing protein 1A isoform X3
103140875	-2.07901	0	tmem245	transmembrane protein 245 isoform X1
103155541	-2.05841	0	LOC103155541	endoplasmic reticulum mannosyl-oligosaccharide 1,2-alpha-mannosidase-like isoform X1
103133561	-2.04444	0	LOC103133561	indoleamine 2,3-dioxygenase 2-like
103133025	-2.03708	0	lamp5	lysosome-associated membrane glycoprotein 5
103129995	-2.02887	0	LOC103129995	dystroglycan-like
103143889	-2.02118	0	neurl1	E3 ubiquitin-protein ligase NEURL1 isoform X1
103134368	-2.01843	0	ifih1	interferon-induced helicase C domain-containing protein 1
103150337	-2.00719	0	smarcc1	SWI/SNF complex subunit SMARCC1 isoform X1
103152330	-1.98587	0	LOC103152330	titin homolog
103155553	-1.98138	0	LOC103155553	collagen alpha-1(I) chain-like isoform X1
103135056	-1.97715	0	snrnp40	U5 small nuclear ribonucleoprotein 40 kDa protein
103129576	-1.94039	0	pmel	melanocyte protein PMEL isoform X1
103130576	-1.93991	0	fgfr1op	FGFR1 oncogene partner isoform X2
103154840	-1.9187	0	stxbp6	syntaxin-binding protein 6 isoform X2
103154147	-1.91308	0	LOC103154147	procollagen galactosyltransferase 1-like
103132554	-1.90689	0	LOC103132554	CTD small phosphatase-like protein isoform X1
103133565	-1.87515	0	LOC103133565	autophagy-related protein 16-like isoform X1
103139618	-1.87252	0	smg6	telomerase-binding protein EST1A isoform X3
103144417	-1.85609	0	abcc8	ATP-binding cassette sub-family C member 8 isoform X1
103148049	-1.81007	0	LOC103148049	extracellular calcium-sensing receptor-like
103152008	-1.79483	0	LOC103152008	pyruvate dehydrogenase (acetyl-transferring) kinase isozyme 2, mitochondrial-like
103151253	-1.76812	0	LOC103151253	uncharacterized protein LOC103151253
103139277	-1.69625	0	iglon5	igLON family member 5 isoform X1
103131140	-1.65813	0	ankrd34a	ankyrin repeat domain-containing protein 34A
103147589	-1.65275	0	LOC103147589	structural maintenance of chromosomes protein 1B-like isoform X2
103129734	-1.65189	0	LOC103129734	probable D-tyrosyl-tRNA(Tyr) deacylase 2
103155135	-1.6507	0	itga1	integrin alpha-1 isoform X2
103129917	-1.64886	0	LOC103129917	protocadherin alpha-C2-like isoform X3
103155588	-1.63076	0	tmem201	transmembrane protein 201
103146022	-1.63019	0	nsun2	tRNA (cytosine(34)-C(5))-methyltransferase
103143985	-1.57564	0	LOC103143985	adhesion G protein-coupled receptor G3-like
103149537	-1.55385	0	wls	LOW QUALITY PROTEIN: protein wntless homolog
103138285	-1.54566	0	rhbdd1	rhomboid-related protein 4
103142414	-1.49442	0	LOC103142414	receptor-type tyrosine-protein phosphatase U-like, partial
103131793	-1.48419	0	ppm1e	protein phosphatase 1E
103142854	-1.4702	0	limk2	LIM domain kinase 2
103142832	-1.43341	0	esrrg	estrogen-related receptor gamma isoform X5
103140926	-1.42482	0	LOC103140926	protein sidekick-2-like isoform X2
103146690	-1.35647	0	tap1	antigen peptide transporter 1
103133675	-1.3536	0	kras	GTPase KRas isoform X2
103156532	-1.35119	0	LOC103156532	nucleotide exchange factor SIL1-like
103129771	-1.33752	0	LOC103129771	Down syndrome cell adhesion molecule homolog isoform X2
103139106	-1.33488	0	LOC103139106	ubiquitin-conjugating enzyme E2 variant 1
103144463	-1.31314	0	LOC103144463	CUGBP Elav-like family member 3 isoform X2
103130045	-1.30779	0	eif5a2	eukaryotic translation initiation factor 5A-2
103153914	-1.30539	0	LOC103153914	interleukin-10 receptor subunit beta-like
103148574	-1.28728	0	dnajb4	dnaJ homolog subfamily B member 4 isoform X1
103149410	-1.27319	0	LOC103149410	cytochrome P450 20A1
103131662	-1.24469	0	tdrd12	putative ATP-dependent RNA helicase TDRD12
103131544	-1.22851	0	LOC103131544	RING finger protein 122-like
103151289	-1.2073	0	osgep	probable tRNA N6-adenosine threonylcarbamoyltransferase
103144629	-1.1636	0	emc4	ER membrane protein complex subunit 4
103141662	-1.13965	0	tom1l2	TOM1-like protein 2 isoform X1
103155203	-1.13624	0	LOC103155203	bicaudal D-related protein 1-like
103138437	-1.11415	0	toe1	target of EGR1 protein 1
103129733	-1.10889	0	atg14	beclin 1-associated autophagy-related key regulator isoform X2
103143581	-1.10208	0	LOC103143581	high affinity cAMP-specific and IBMX-insensitive 3\',5\'-cyclic phosphodiesterase 8A isoform X2
103150024	-1.06746	0	LOC103150024	LOW QUALITY PROTEIN: myomegalin-like
103134820	-1.06707	0	LOC103134820	semaphorin-5B
103145939	-1.04116	0	aadat	kynurenine/alpha-aminoadipate aminotransferase, mitochondrial
103145511	-1.0338	0	LOC103145511	adapter molecule crk-like
103134554	-1.02358	0	cers5	ceramide synthase 5
103137041	-1.008	0	ralgps2	ras-specific guanine nucleotide-releasing factor RalGPS2 isoform X1
103144219	-1.00344	0	cdr2l	cerebellar degeneration-related protein 2-like
103145019	-0.984118	0	LOC103145019	protein SSUH2 homolog isoform X1
103149288	-0.981486	0	fmr1	LOW QUALITY PROTEIN: fragile X mental retardation protein 1
103152889	-0.97058	0	LOC103152889	heterogeneous nuclear ribonucleoprotein A/B-like
103131465	-0.965679	0	LOC103131465	methylcrotonoyl-CoA carboxylase beta chain, mitochondrial-like
103146939	-0.955611	0	emc9	ER membrane protein complex subunit 9
103129909	-0.932994	0	yipf6	protein YIPF6
103139597	-0.925949	0	LOC103139597	zinc finger matrin-type protein 1-like
103135776	-0.915208	0	ube2v2	ubiquitin-conjugating enzyme E2 variant 2
103143298	-0.902317	0	mycl	protein L-Myc
103151603	-0.899878	0	abtb2	ankyrin repeat and BTB/POZ domain-containing protein 2
103143051	-0.8593	0	LOC103143051	protein FAM131A-like isoform X1
103140428	-0.845775	0	LOC103140428	deleted in autism protein 1
103141195	-0.831243	0	atad2	ATPase family AAA domain-containing protein 2 isoform X1
103155688	-0.830753	0	rsl24d1	probable ribosome biogenesis protein RLP24
103130433	-0.81296	0	hsp90b1	endoplasmin
103144827	-0.804505	0	usp38	ubiquitin carboxyl-terminal hydrolase 38
103133989	-0.803377	0	LOC103133989	Down syndrome cell adhesion molecule-like protein 1 homolog isoform X1
103143858	-0.798617	0	LOC103143858	ATP-binding cassette sub-family A member 1-like isoform X1
103143236	-0.783966	0	top2a	DNA topoisomerase 2-alpha
103134959	-0.783863	0	LOC103134959	F-box only protein 30-like
103129910	-0.769225	0	LOC103129910	uncharacterized protein LOC103129910
103138836	-0.755725	0	sssca1	Sjoegren syndrome/scleroderma autoantigen 1 isoform X2
103153651	-0.754454	0	abcc10	multidrug resistance-associated protein 7
103130227	-0.74088	0	ddx18	ATP-dependent RNA helicase DDX18
103134871	-0.735962	0	rufy3	protein RUFY3 isoform X1
103143187	-0.729979	0	LOC103143187	zinc finger protein 628-like isoform X1
103153253	-0.719388	0	trmt1	tRNA (guanine(26)-N(2))-dimethyltransferase isoform X1
103137322	-0.699058	0	qdpr	dihydropteridine reductase
103156751	-0.648145	0	ssr1	translocon-associated protein subunit alpha isoform X2
103138568	-0.6302	0	lars	leucine--tRNA ligase, cytoplasmic
103146561	-0.629819	0	LOC103146561	receptor expression-enhancing protein 5-like isoform X3
103129863	-0.569912	0	LOC103129863	LOW QUALITY PROTEIN: inner nuclear membrane protein Man1-like
103147647	-0.55946	0	espl1	separin
103131734	-0.530521	0	LOC103131734	coronin-2B-like isoform X1
103142628	-0.473207	0	LOC103142628	nucleoside diphosphate kinase B-like
103134449	-0.471853	0	mov10l1	RNA helicase Mov10l1
103147338	-0.468172	0	cxxc1	CXXC-type zinc finger protein 1
103145800	-0.380083	0	LOC103145800	protein LSM14 homolog B-like isoform X2
103139474	0.310364	0	eif4g2	eukaryotic translation initiation factor 4 gamma 2, partial
103139661	0.342304	0	LOC103139661	synaptotagmin-like protein 2 isoform X4
103145320	0.343611	0	myo1b	unconventional myosin-Ib isoform X1
103146941	0.345451	0	LOC103146941	adhesive plaque matrix protein-like
103135590	0.347741	0	gdf9	growth/differentiation factor 9
103129587	0.380322	0	cdk4	cyclin-dependent kinase 4
103134089	0.389508	0	frmd1	FERM domain-containing protein 1
103143432	0.40179	0	LOC103143432	MKL/myocardin-like protein 2 isoform X3
103147849	0.402185	0	LOC103147849	isocitrate dehydrogenase
103141994	0.4265	0	LOC103141994	lysosome membrane protein 2-like isoform X1
103146474	0.431831	0	copg2	coatomer subunit gamma-2
103135225	0.442868	0	pola1	DNA polymerase alpha catalytic subunit isoform X1
103138711	0.46309	0	ktn1	kinectin isoform X5
103156936	0.469575	0	uhrf1bp1l	UHRF1-binding protein 1-like isoform X1
103144835	0.488459	0	mmaa	methylmalonic aciduria type A protein, mitochondrial
103136454	0.498635	0	errfi1	ERBB receptor feedback inhibitor 1
103140982	0.503367	0	birc2	baculoviral IAP repeat-containing protein 2 isoform X2
103135103	0.519306	0	azin1b	antizyme inhibitor 1b
103145616	0.52103	0	fam76b	protein FAM76B
103142606	0.521456	0	LOC103142606	transducin-like enhancer protein 4 isoform X4
103154658	0.530579	0	mgat1	alpha-1,3-mannosyl-glycoprotein 2-beta-N-acetylglucosaminyltransferase
103155462	0.537329	0	LOC103155462	uncharacterized protein LOC103155462 isoform X2
103149779	0.552575	0	LOC103149779	transcriptional repressor NF-X1
103150087	0.558237	0	cdc25b	M-phase inducer phosphatase 2
103131718	0.577836	0	LOC103131718	uncharacterized protein LOC103131718 isoform X2
103152200	0.586711	0	fnip1	folliculin-interacting protein 1 isoform X3
103148579	0.590852	0	zzz3	ZZ-type zinc finger-containing protein 3 isoform X1
103131668	0.593274	0	LOC103131668	nucleoprotein TPR-like
103147135	0.6069	0	LOC103147135	radixin-like isoform X1
103135623	0.61162	0	LOC103135623	SLAIN motif-containing protein-like isoform X1
103136500	0.63507	0	ppm1g	protein phosphatase 1G isoform X2
103144242	0.640705	0	LOC103144242	protein Tob1-like
103152749	0.648542	0	ap5b1	AP-5 complex subunit beta-1
103138471	0.652767	0	LOC103138471	epidermal growth factor receptor substrate 15 isoform X7
103134176	0.670707	0	pdia6	protein disulfide-isomerase A6 isoform X2
103135108	0.675192	0	adnp2	ADNP homeobox protein 2
103148059	0.68039	0	dhx36	ATP-dependent RNA helicase DHX36
103149003	0.717116	0	ppp1r3c	protein phosphatase 1 regulatory subunit 3C
103134617	0.732215	0	rps10	40S ribosomal protein S10
103136338	0.747528	0	kpna4	importin subunit alpha-3
103150638	0.755713	0	gtf2e1	general transcription factor IIE subunit 1
103131876	0.755794	0	mak16	protein MAK16 homolog
103141455	0.756554	0	slc12a8	solute carrier family 12 member 8 isoform X2
103138499	0.756707	0	LOC103138499	zinc finger RNA-binding protein isoform X4
103148772	0.756857	0	LOC103148772	uncharacterized protein C17orf53 homolog
103156915	0.761375	0	tmem259	membralin
103155147	0.76482	0	LOC103155147	pericentrin-like isoform X1
103144256	0.767062	0	rpusd2	RNA pseudouridylate synthase domain-containing protein 2 isoform X1
103151587	0.77186	0	LOC103151587	LOW QUALITY PROTEIN: polyadenylate-binding protein 1-like
103137779	0.773726	0	LOC103137779	lysine-specific demethylase 4C-like isoform X1
103139815	0.802193	0	tbl1xr1	F-box-like/WD repeat-containing protein TBL1XR1
103151527	0.81157	0	rbm17	splicing factor 45 isoform X2
103156215	0.8227	0	LOC103156215	prohibitin-2-like
103129256	0.825868	0	asun	protein asunder homolog isoform X2
103148149	0.841045	0	pwwp2b	PWWP domain-containing protein 2B
103155592	0.841259	0	dnajc2	dnaJ homolog subfamily C member 2
103135001	0.850369	0	twistnb	DNA-directed RNA polymerase I subunit RPA43
103131406	0.850386	0	srp19	signal recognition particle 19 kDa protein
103130447	0.858338	0	LOC103130447	serine/arginine-rich splicing factor 5-like
103132108	0.858802	0	LOC103132108	target of Myb protein 1-like isoform X4
103151131	0.869246	0	LOC103151131	uncharacterized protein LOC103151131
103155171	0.870313	0	LOC103155171	semaphorin-4E-like
103141696	0.874145	0	slc25a19	mitochondrial thiamine pyrophosphate carrier
103154564	0.885056	0	ehmt2	histone-lysine N-methyltransferase EHMT2 isoform X1
103152736	0.920695	0	ptpdc1	protein tyrosine phosphatase domain-containing protein 1
103150736	0.924726	0	myo1e	unconventional myosin-Ie isoform X1
103145794	0.933449	0	LOC103145794	actin-related protein 2/3 complex subunit 4
103137925	0.936965	0	tbc1d1	TBC1 domain family member 1 isoform X3
103130054	0.939106	0	acot9	acyl-coenzyme A thioesterase 9, mitochondrial isoform X1
103138774	0.950733	0	syne3	nesprin-3 isoform X1
103154639	0.958626	0	gemin2	gem-associated protein 2 isoform X1
103151005	0.97165	0	lin54	protein lin-54 homolog
103136655	0.974499	0	grwd1	glutamate-rich WD repeat-containing protein 1
103140741	0.981535	0	rev3l	DNA polymerase zeta catalytic subunit isoform X1
103155989	0.992623	0	heca	headcase protein homolog
103137642	0.996049	0	klc4	kinesin light chain 4 isoform X4
103140792	1.00563	0	LOC103140792	sorting nexin-27-like
103130946	1.00564	0	LOC103130946	zinc transporter ZIP6-like
103137718	1.00983	0	ap1m2	AP-1 complex subunit mu-2 isoform X1
103152597	1.0126	0	carhsp1	calcium-regulated heat stable protein 1
103149794	1.02161	0	LOC103149794	titin-like
103145427	1.02593	0	hirip3	HIRA-interacting protein 3 isoform X4
103136210	1.03147	0	LOC103136210	signal-induced proliferation-associated 1-like protein 1
103142823	1.04155	0	nip7	60S ribosome subunit biogenesis protein NIP7 homolog
103134215	1.04159	0	LOC103134215	ribulose-phosphate 3-epimerase-like
103156143	1.04183	0	rasal2	ras GTPase-activating protein nGAP isoform X7
103147828	1.0433	0	etfa	electron transfer flavoprotein subunit alpha, mitochondrial
103156356	1.04657	0	prdm4	PR domain zinc finger protein 4
103129643	1.07382	0	nudt18	8-oxo-dGDP phosphatase NUDT18 isoform X1
103155255	1.07517	0	d2hgdh	D-2-hydroxyglutarate dehydrogenase, mitochondrial isoform X1
103150307	1.08485	0	ankmy2	ankyrin repeat and MYND domain-containing protein 2
103150275	1.08633	0	arid3b	AT-rich interactive domain-containing protein 3B isoform X1
103147382	1.10622	0	mief1	mitochondrial dynamics protein MID51
103151192	1.10925	0	LOC103151192	LIM domain-containing protein 1-like
103142033	1.11148	0	psat1	phosphoserine aminotransferase
103152632	1.12881	0	LOC103152632	protein HIRA
103149201	1.13558	0	LOC103149201	anoctamin-9-like isoform X1
103135411	1.1365	0	snta1	alpha-1-syntrophin
103129389	1.15483	0	LOC103129389	apoptosis facilitator Bcl-2-like protein 14
103148752	1.17417	0	brf2	transcription factor IIIB 50 kDa subunit
103156514	1.17497	0	sigirr	single Ig IL-1-related receptor
103141932	1.18615	0	fkbp15	FK506-binding protein 15 isoform X4
103152725	1.18719	0	LOC103152725	cytosolic 10-formyltetrahydrofolate dehydrogenase-like
103146633	1.20392	0	naf1	H/ACA ribonucleoprotein complex non-core subunit NAF1 isoform X2
103130771	1.21262	0	LOC103130771	protein farnesyltransferase subunit beta-like
103145068	1.2311	0	tmcc1	transmembrane and coiled-coil domains protein 1 isoform X2
103140500	1.23677	0	LOC103140500	structural maintenance of chromosomes flexible hinge domain-containing protein 1-like isoform X1
103145925	1.24328	0	klc2	kinesin light chain 2 isoform X1
103138988	1.24478	0	rnf145	RING finger protein 145
103139749	1.26226	0	LOC103139749	beta-1,3-glucosyltransferase-like isoform X1
103130044	1.26914	0	rpl22l1	60S ribosomal protein L22-like 1
103145074	1.28315	0	LOC103145074	cytochrome c oxidase subunit 7C, mitochondrial
103148511	1.29408	0	LOC103148511	uncharacterized protein LOC103148511
103153913	1.29912	0	kif3c	kinesin-like protein KIF3C
103129952	1.32693	0	rpp40	ribonuclease P protein subunit p40
103156408	1.32814	0	ndufaf7	NADH dehydrogenase
103143140	1.33286	0	LOC103143140	uncharacterized protein LOC103143140
103133845	1.35521	0	znhit3	zinc finger HIT domain-containing protein 3 isoform X1
103156175	1.35959	0	LOC103156175	transcription intermediary factor 1-alpha-like isoform X1
103155812	1.36304	0	LOC103155812	engulfment and cell motility protein 3-like
103142027	1.37399	0	LOC103142027	threonine--tRNA ligase, cytoplasmic isoform X2
103131922	1.38152	0	LOC103131922	uncharacterized protein LOC103131922
103147314	1.38213	0	LOC103147314	class E basic helix-loop-helix protein 40-like
103152433	1.40252	0	nagpa	N-acetylglucosamine-1-phosphodiester alpha-N-acetylglucosaminidase
103129222	1.41259	0	cad	CAD protein isoform X1
103150423	1.41919	0	rfxank	DNA-binding protein RFXANK isoform X2
103139198	1.42768	0	mrps9	28S ribosomal protein S9, mitochondrial
103138088	1.44735	0	fto	alpha-ketoglutarate-dependent dioxygenase FTO
103139723	1.45824	0	ythdf3	YTH domain-containing family protein 3
103131105	1.46221	0	znf79	zinc finger protein 79 isoform X1
103129319	1.46385	0	LOC103129319	diphosphoinositol polyphosphate phosphohydrolase 3-beta-like
103150682	1.47552	0	LOC103150682	AMP deaminase 2-like isoform X4
103131048	1.48375	0	LOC103131048	probable cationic amino acid transporter
103147095	1.49012	0	LOC103147095	peripheral plasma membrane protein CASK-like isoform X10
103154587	1.49632	0	tnfrsf19	tumor necrosis factor receptor superfamily member 19 isoform X1
103154417	1.49678	0	LOC103154417	metal transporter CNNM4-like isoform X1
103154136	1.51632	0	LOC103154136	glycerol-3-phosphate transporter-like
103140882	1.52191	0	LOC103140882	DENN domain-containing protein 3-like
103145188	1.52686	0	mfsd8	major facilitator superfamily domain-containing protein 8
103147966	1.53201	0	LOC103147966	zinc finger protein 205-like, partial
103137035	1.53294	0	LOC103137035	cytochrome c oxidase assembly factor 7
103150865	1.54267	0	cep85l	centrosomal protein of 85 kDa-like isoform X1
103156077	1.5502	0	rdh13	retinol dehydrogenase 13
103130047	1.55457	0	mynn	myoneurin
103148897	1.55607	0	dgcr14	protein DGCR14
103138465	1.5617	0	dmrta2	doublesex- and mab-3-related transcription factor A2
103147964	1.57809	0	LOC103147964	zinc finger and SCAN domain-containing protein 12-like
103141408	1.57947	0	rbm43	RNA-binding protein 43
103140199	1.58973	0	gcc1	GRIP and coiled-coil domain-containing protein 1
103132535	1.60271	0	LOC103132535	unconventional myosin-Vb-like
103151757	1.63774	0	cnnm3	metal transporter CNNM3 isoform X2
103142679	1.64515	0	vps33b	vacuolar protein sorting-associated protein 33B
103134124	1.66821	0	t	brachyury protein
103152437	1.67022	0	wdr73	WD repeat-containing protein 73
103147942	1.67281	0	LOC103147942	zinc finger protein 501-like isoform X1
103134777	1.69446	0	sestd1	SEC14 domain and spectrin repeat-containing protein 1
103136740	1.71295	0	plekhg6	pleckstrin homology domain-containing family G member 6
103135004	1.72825	0	stxbp5	syntaxin-binding protein 5 isoform X1
103141633	1.73295	0	LOC103141633	chromobox protein homolog 8-like
103154763	1.74793	0	nars	asparagine--tRNA ligase, cytoplasmic isoform X1
103137641	1.78347	0	ptk7	inactive tyrosine-protein kinase 7
103140795	1.79686	0	krtcap2	keratinocyte-associated protein 2
103129328	1.80624	0	LOC103129328	BRCA1-associated RING domain protein 1-like isoform X1
103144019	1.82874	0	hexdc	hexosaminidase D isoform X1
103156461	1.83335	0	cnot11	CCR4-NOT transcription complex subunit 11
103153866	1.8498	0	LOC103153866	ubiquinol-cytochrome-c reductase complex assembly factor 1
103130152	1.86258	0	LOC103130152	neuroplastin-like isoform X1
103152285	1.87846	0	LOC103152285	kinesin-like protein KIFC3
103129327	1.88023	0	bard1	BRCA1-associated RING domain protein 1
103154103	1.8999	0	LOC103154103	N-myc-interactor
103137220	1.9039	0	efcab7	EF-hand calcium-binding domain-containing protein 7
103141008	1.91583	0	dnaaf5	dynein assembly factor 5, axonemal
103135484	1.92841	0	LOC103135484	ubiquitin-conjugating enzyme E2 K-like
103148597	1.95834	0	tep1	telomerase protein component 1 isoform X2
103149630	1.97517	0	LOC103149630	ubiquitin-conjugating enzyme E2 T
103130892	1.99149	0	hsd17b10	3-hydroxyacyl-CoA dehydrogenase type-2
103130123	2.0302	0	aars2	LOW QUALITY PROTEIN: alanine--tRNA ligase, mitochondrial
103135739	2.03264	0	aqp1	aquaporin-1
103138173	2.04784	0	LOC103138173	fas apoptotic inhibitory molecule 1-like
103156577	2.09694	0	epsti1	epithelial-stromal interaction protein 1 isoform X1
103140127	2.11279	0	tex11	testis-expressed sequence 11 protein
103152329	2.12526	0	LOC103152329	uncharacterized protein LOC103152329 isoform X1
103151183	2.13273	0	LOC103151183	syndecan-2-A-like
103155695	2.13465	0	LOC103155695	disintegrin and metalloproteinase domain-containing protein 10-like
103152407	2.1384	0	LOC103152407	acyl-CoA synthetase family member 2, mitochondrial-like
103153909	2.17185	0	LOC103153909	poly
103134890	2.17659	0	rasgef1b	ras-GEF domain-containing family member 1B isoform X1
103142317	2.2431	0	comtd1	catechol O-methyltransferase domain-containing protein 1 isoform X2
103138744	2.26889	0	alkbh1	DNA oxidative demethylase ALKBH1 isoform X1
103140011	2.27268	0	LOC103140011	KN motif and ankyrin repeat domain-containing protein 4-like
103151591	2.27511	0	LOC103151591	grainyhead-like protein 2 homolog
103156897	2.28469	0	LOC103156897	ras-related protein Rab-3B-like isoform X1
103152983	2.29057	0	LOC103152983	ATP-binding cassette sub-family G member 1 isoform X2
103155820	2.29361	0	hsdl1	inactive hydroxysteroid dehydrogenase-like protein 1
103156001	2.30083	0	tmeff1	tomoregulin-1
103136430	2.31964	0	LOC103136430	paired box protein Pax-7 isoform X2
103140595	2.32117	0	LOC103140595	phosphatidylinositol 3,4,5-trisphosphate 3-phosphatase TPTE2-like isoform X2
103149272	2.3436	0	LOC103149272	SH2 domain-containing protein 4A-like
103156409	2.36081	0	LOC103156409	connector enhancer of kinase suppressor of ras 3-like
103148915	2.37581	0	LOC103148915	transcription factor Adf-1-like
103145425	2.38711	0	xpo6	exportin-6
103141280	2.38907	0	ddb2	DNA damage-binding protein 2 isoform X2
103136020	2.40749	0	LOC103136020	multiple C2 and transmembrane domain-containing protein 2-like isoform X2
103156217	2.41295	0	lrrc40	leucine-rich repeat-containing protein 40 isoform X3
103136900	2.42353	0	LOC103136900	flocculation protein FLO11-like
103131934	2.44529	0	brcc3	lys-63-specific deubiquitinase BRCC36
103134856	2.44829	0	LOC103134856	cyclic nucleotide-gated cation channel alpha-4-like
103145111	2.45767	0	dock1	dedicator of cytokinesis protein 1
103151639	2.47244	0	anapc10	anaphase-promoting complex subunit 10
103141632	2.48996	0	LOC103141632	E3 SUMO-protein ligase CBX4-like
103146534	2.50989	0	fndc3b	fibronectin type III domain-containing protein 3B isoform X4
103149751	2.56045	0	vps52	vacuolar protein sorting-associated protein 52 homolog
103151259	2.58811	0	nphp4	nephrocystin-4 isoform X2
103156616	2.59022	0	slco2b1	solute carrier organic anion transporter family member 2B1 isoform X2
103131291	2.60894	0	LOC103131291	frizzled-7-A-like
103143365	2.62079	0	adarb2	double-stranded RNA-specific editase B2
103144141	2.62811	0	LOC103144141	protein FAM46A-like
103154987	2.65774	0	LOC103154987	exostosin-1c isoform X1
103146879	2.66708	0	LOC103146879	globoside alpha-1,3-N-acetylgalactosaminyltransferase 1-like
103151145	2.68111	0	LOC103151145	DIS3-like exonuclease 1
103151813	2.68346	0	LOC103151813	GRB2-related adapter protein
103133904	2.68977	0	ammecr1	AMME syndrome candidate gene 1 protein
103150365	2.70639	0	LOC103150365	MAGUK p55 subfamily member 6-like
103144950	2.72394	0	mybpc2	myosin-binding protein C, fast-type isoform X2
103147340	2.7652	0	LOC103147340	red-sensitive opsin
103130851	2.79379	0	LOC103130851	tryptophan 5-hydroxylase 2-like
103133563	2.80332	0	adam12	disintegrin and metalloproteinase domain-containing protein 12 isoform X1
103149075	2.81393	0	wdr55	WD repeat-containing protein 55
103138170	2.84974	0	LOC103138170	extended synaptotagmin-3-like isoform X1
103136651	2.86483	0	rps9	40S ribosomal protein S9
103140518	2.88538	0	adgrg2	adhesion G-protein coupled receptor G2
103151548	2.92466	0	LOC103151548	ankyrin repeat domain-containing protein 33B
103135662	2.96548	0	shmt2	serine hydroxymethyltransferase, mitochondrial
103144554	3.00975	0	LOC103144554	transmembrane protein 230-like
103136588	3.01637	0	LOC103136588	lysosomal protective protein-like
103141129	3.03661	0	mia	melanoma-derived growth regulatory protein isoform X1
103154095	3.03787	0	LOC103154095	U3 small nucleolar RNA-associated protein 14 homolog A-like
103155793	3.0397	0	LOC103155793	solute carrier family 2, facilitated glucose transporter member 9-like isoform X1
103142634	3.1238	0	LOC103142634	stimulated by retinoic acid gene 6 protein homolog isoform X2
103155267	3.15827	0	ankmy1	ankyrin repeat and MYND domain-containing protein 1
103134860	3.17453	0	kank1	KN motif and ankyrin repeat domain-containing protein 1 isoform X2
103154886	3.183	0	LOC103154886	receptor-type tyrosine-protein phosphatase mu-like
103141434	3.19229	0	LOC103141434	gamma-aminobutyric acid receptor subunit alpha-5-like isoform X1
103132086	3.19554	0	LOC103132086	receptor-type tyrosine-protein phosphatase mu-like
103152124	3.22215	0	arl13b	ADP-ribosylation factor-like protein 13B isoform X4
103137042	3.3287	0	fam20b	glycosaminoglycan xylosylkinase
103155108	3.33409	0	wdr24	WD repeat-containing protein 24
103130328	3.33524	0	LOC103130328	prostaglandin E2 receptor EP2 subtype
103149753	3.36094	0	ring1	E3 ubiquitin-protein ligase RING1 isoform X2
103131394	3.36139	0	pik3r4	phosphoinositide 3-kinase regulatory subunit 4 isoform X1
103143467	3.38686	0	LOC103143467	Na(+)/H(+) exchanger beta-like
103146588	3.48748	0	epo	erythropoietin isoform X1
103148494	3.54485	0	LOC103148494	regulating synaptic membrane exocytosis protein 1-like isoform X6
103129745	3.55818	0	katnbl1	KATNB1-like protein 1 isoform X1
103150384	3.55823	0	cpvl	probable serine carboxypeptidase CPVL
103153201	3.57758	0	evpl	envoplakin
103156580	3.588	0	LOC103156580	diacylglycerol kinase eta isoform X1
103149321	3.66611	0	gabrb3	gamma-aminobutyric acid receptor subunit beta-3 isoform X1
103129409	3.6838	0	phtf2	putative homeodomain transcription factor 2 isoform X1
103139380	3.70888	0	pros1	vitamin K-dependent protein S
103131393	3.72902	0	LOC103131393	calcium-transporting ATPase type 2C member 1-like isoform X3
103142973	3.73183	0	iqgap2	ras GTPase-activating-like protein IQGAP2
103138798	3.75237	0	unc79	protein unc-79 homolog isoform X9
103146267	3.76752	0	folh1b	putative N-acetylated-alpha-linked acidic dipeptidase
103136441	3.77797	0	LOC103136441	uncharacterized protein LOC103136441 isoform X5
103147604	3.7871	0	nrip3	nuclear receptor-interacting protein 3 isoform X1
103143478	3.81418	0	nedd9	enhancer of filamentation 1
103140983	3.82823	0	LOC103140983	ubiquitin carboxyl-terminal hydrolase 22 isoform X2
103155217	3.83507	0	psmd13	26S proteasome non-ATPase regulatory subunit 13
103154185	3.86996	0	LOC103154185	calpain-9-like isoform X1
103145430	3.88113	0	polr3g	DNA-directed RNA polymerase III subunit RPC7
103147725	3.92836	0	LOC103147725	redox-regulatory protein FAM213A-like isoform X1
103131304	3.93001	0	derl2	derlin-2
103142862	3.93887	0	LOC103142862	leucine-rich repeat transmembrane protein FLRT3-like
103130052	3.9452	0	apoo	MICOS complex subunit MIC26
103142470	3.97128	0	pyurf	protein preY, mitochondrial
103136795	4.00257	0	LOC103136795	uncharacterized protein LOC103136795 isoform X1
103130066	4.03572	0	LOC103130066	protein SON isoform X1
103134779	4.03963	0	dnajc15	dnaJ homolog subfamily C member 15
103129134	4.04311	0	zdhhc1	probable palmitoyltransferase ZDHHC1
103156467	4.08315	0	lacc1	laccase domain-containing protein 1
103136473	4.09036	0	LOC103136473	SH3 domain-containing protein 19-like isoform X1
103140197	4.13154	0	lamtor4	ragulator complex protein LAMTOR4
103137720	4.2554	0	LOC103137720	volume-regulated anion channel subunit LRRC8C-like
103143437	4.26309	0	LOC103143437	glycogen synthase kinase-3 beta-like isoform X1
103151135	4.27574	0	LOC103151135	golgin subfamily B member 1-like isoform X3
103152362	4.443	0	LOC103152362	nuclear distribution protein nudE-like 1-B isoform X2
103151221	4.60504	0	LOC103151221	phosphatidylinositol 4-phosphate 5-kinase type-1 gamma-like isoform X2
107837747	4.6241	0	LOC107837747	vasoactive intestinal polypeptide receptor 2-like
103156195	4.69152	0	LOC103156195	CD99 antigen-like protein 2
103131721	4.70109	0	LOC103131721	ras GTPase-activating-like protein IQGAP1
103140303	4.76393	0	LOC103140303	ankyrin repeat and SOCS box protein 11-like
103132345	4.7869	0	gpatch1	G patch domain-containing protein 1
103140302	4.79518	0	piga	phosphatidylinositol N-acetylglucosaminyltransferase subunit A
103156320	4.79908	0	LOC103156320	complement C3-like isoform X2
103151151	4.84479	0	cttn	src substrate cortactin
103141665	5.01144	0	gfra3	GDNF family receptor alpha-3
103142691	5.01713	0	e2f8	transcription factor E2F8
107837949	5.09722	0	LOC107837949	uncharacterized protein LOC107837949 isoform X1
103144000	5.15568	0	LOC103144000	uncharacterized protein C17orf62 homolog
103143508	5.16009	0	LOC103143508	LOW QUALITY PROTEIN: uncharacterized protein LOC103143508
103142639	5.20642	0	LOC103142639	very-long-chain (3R)-3-hydroxyacyl-CoA dehydratase-like
103135880	5.20813	0	LOC103135880	proline-rich protein 13-like
103151435	5.31235	0	rexo4	RNA exonuclease 4
103143429	5.32898	0	LOC103143429	uncharacterized protein LOC103143429 isoform X1
103156947	5.39728	0	LOC103156947	uncharacterized protein LOC103156947
103140733	5.44377	0	tube1	tubulin epsilon chain isoform X1
103139941	5.46016	0	LOC103139941	chymotrypsin A-like isoform X1
103147934	5.48635	0	LOC103147934	zinc finger protein OZF-like isoform X2
103136587	5.49851	0	LOC103136587	transcription factor E2F4-like isoform X2
103156436	5.51064	0	LOC103156436	docking protein 2-like isoform X1
103154977	5.52714	0	kiaa0319l	dyslexia-associated protein KIAA0319-like protein homolog
103142645	5.68327	0	ero1a	ERO1-like protein alpha
103140252	5.72597	0	syt10	synaptotagmin-10 isoform X1
103155226	5.78353	0	LOC103155226	inositol hexakisphosphate and diphosphoinositol-pentakisphosphate kinase 2-like isoform X2
103156437	5.8146	0	LOC103156437	neuronal membrane glycoprotein M6-a-like
103156951	6.07188	0	LOC103156951	thyrotropin-releasing hormone receptor-like
103140598	6.15671	0	LOC103140598	RNA-binding protein 4B-like
103129884	6.1678	0	tspan8	tetraspanin-8, partial
103130002	6.39218	0	atp9b	probable phospholipid-transporting ATPase IIB isoform X1
103155585	6.41064	0	perm1	PGC-1 and ERR-induced regulator in muscle protein 1
103146592	6.61346	0	pop7	ribonuclease P protein subunit p20
103141003	6.66399	0	srl	sarcalumenin isoform X1
103143479	6.75352	0	LOC103143479	uncharacterized protein LOC103143479
103147727	6.84678	0	LOC103147727	leucine zipper putative tumor suppressor 2 homolog
103142632	7.00026	0	LOC103142632	metallophosphoesterase MPPED2
103143440	7.04568	0	LOC103143440	microtubule-actin cross-linking factor 1 isoform X21
103143512	7.15485	0	LOC103143512	free fatty acid receptor 3-like
103143430	7.32472	0	tcf19	transcription factor 19 isoform X1
103149752	7.42518	0	rps18	40S ribosomal protein S18
103134929	7.4706	0	LOC103134929	nuclear factor 7, brain-like
103143661	7.70255	0	gprc5a	retinoic acid-induced protein 3 isoform X1
103149700	7.77084	0	LOC103149700	CD151 antigen-like
103136744	7.89846	0	tapbpl	tapasin-related protein
103156894	8.0264	0	LOC103156894	CCAAT/enhancer-binding protein gamma
103146512	8.03808	0	LOC103146512	protein Wnt-5b isoform X1
103143549	8.06291	0	LOC103143549	interleukin-18 receptor accessory protein-like
103142970	8.07918	0	LOC103142970	uncharacterized protein LOC103142970
103144351	8.28153	0	LOC103144351	copine-8-like isoform X2
103154975	8.37508	0	cap1	adenylyl cyclase-associated protein 1 isoform X2
103142636	8.44339	0	LOC103142636	photoreceptor-specific nuclear receptor-like
103130012	8.48811	0	LOC103130012	plectin-like isoform X2
103156286	8.54575	0	nacc2	nucleus accumbens-associated protein 2
103142971	8.77879	0	f2r	proteinase-activated receptor 1
103143472	8.86458	0	LOC103143472	uncharacterized protein LOC103143472
103156097	8.86951	0	LOC103156097	SPRY domain-containing SOCS box protein 3-like
103140566	8.90581	0	LOC103140566	probable polyketide synthase 16
103147603	8.93062	0	LOC103147603	uncharacterized protein C11orf16 homolog
103151130	9.01305	0	arfgap2	ADP-ribosylation factor GTPase-activating protein 2 isoform X2
103130010	9.01819	0	LOC103130010	sal-like protein 3 isoform X1
103142695	9.15726	0	LOC103142695	non-muscle caldesmon-like isoform X3
103134056	9.20081	0	LOC103134056	dual specificity protein phosphatase 13-like
103142646	9.22517	0	samd4a	protein Smaug homolog 1
103140848	9.28153	0	LOC103140848	uncharacterized protein LOC103140848
103147397	9.30158	0	LOC103147397	MKL/myocardin-like protein 1
103151154	9.47459	0	shank2	SH3 and multiple ankyrin repeat domains protein 2
103153591	9.50896	0	LOC103153591	potassium voltage-gated channel subfamily KQT member 1-like, partial
103154968	9.5134	0	lsm10	U7 snRNA-associated Sm-like protein LSm10
103153578	9.54313	0	traf6	TNF receptor-associated factor 6
103155213	9.56759	0	LOC103155213	casein kinase II subunit alpha\'-like
103143436	9.62749	0	LOC103143436	protein capicua homolog isoform X3
103131810	9.67685	0	LOC103131810	CKLF-like MARVEL transmembrane domain-containing protein 6, partial
103147064	9.77509	0	LOC103147064	serine-rich coiled-coil domain-containing protein 2-like isoform X1
103129420	9.79501	0	anxa2	annexin A2
103150978	9.80341	0	LOC103150978	synaptotagmin-6 isoform X1
103148075	9.85478	0	LOC103148075	P2Y purinoceptor 13-like
103149036	9.88765	0	LOC103149036	uncharacterized protein LOC103149036
103155165	9.89159	0	LOC103155165	ras-related protein Rab-11B-like
103155321	9.91949	0	LOC103155321	39S ribosomal protein L49, mitochondrial-like
103133002	10.0895	0	LOC103133002	dual specificity protein phosphatase 14-like
103137511	10.1013	0	LOC103137511	vigilin-like
103155224	10.1998	0	LOC103155224	aggrecan core protein-like isoform X2
103154976	10.2149	0	ppt1	palmitoyl-protein thioesterase 1
103152226	10.2179	0	cutc	copper homeostasis protein cutC homolog isoform X1
103147726	10.2194	0	LOC103147726	sideroflexin-1-like
103149706	10.2539	0	bbox1	gamma-butyrobetaine dioxygenase
103155223	10.3032	0	LOC103155223	zinc finger protein 408-like
103155068	10.3231	0	nlgn4x	neuroligin-4, X-linked
103151491	10.3288	0	LOC103151491	solute carrier family 2, facilitated glucose transporter member 9-like
103132726	10.37	0	LOC103132726	uncharacterized protein LOC103132726, partial
103142667	10.3818	0	LOC103142667	high choriolytic enzyme 1-like isoform X1
103143468	10.4131	0	cfap69	cilia- and flagella-associated protein 69 isoform X2
103129418	10.4754	0	gtf2a2	transcription initiation factor IIA subunit 2
103153455	10.515	0	LOC103153455	gamma-aminobutyric acid receptor-associated protein-like 2
103130563	10.5468	0	snrnp70	U1 small nuclear ribonucleoprotein 70 kDa
103140308	10.6242	0	dynlt3	dynein light chain Tctex-type 3
103143494	10.691	0	LOC103143494	zinc finger and BTB domain-containing protein 22-like
103151143	10.721	0	LOC103151143	USP6 N-terminal-like protein
103131539	10.77	0	vps13c	vacuolar protein sorting-associated protein 13C
103130829	10.7984	0	efl1	elongation factor-like GTPase 1 isoform X1
103130388	10.822	0	smim13	small integral membrane protein 13
103143500	11.0197	0	LOC103143500	uncharacterized protein C1orf109 homolog isoform X1
103151129	11.0336	0	pex16	peroxisomal biogenesis factor 16
103139594	11.0625	0	LOC103139594	von Willebrand factor A domain-containing protein 7-like
103144193	11.0634	0	mapk8ip1	C-Jun-amino-terminal kinase-interacting protein 1
103142694	11.1022	0	otog	otogelin
103143483	11.1155	0	LOC103143483	mitochondrial import receptor subunit TOM40 homolog isoform X1
103143498	11.1285	0	tpmt	thiopurine S-methyltransferase
103149703	11.1499	0	arl14ep	ARL14 effector protein
103131515	11.1649	0	LOC103131515	eukaryotic translation initiation factor 3 subunit E-B
103149873	11.2352	0	LOC103149873	transmembrane emp24 domain-containing protein 3-like
103142652	11.2745	0	LOC103142652	gamma-secretase subunit Aph-1b
103130585	11.2832	0	donson	protein downstream neighbor of Son
103154985	11.2873	0	clspn	claspin isoform X2
103142660	11.3385	0	atp6v0d1	V-type proton ATPase subunit d 1
103131730	11.3498	0	LOC103131730	glycosyltransferase-like protein LARGE2
103131519	11.3841	0	nudcd1	nudC domain-containing protein 1 isoform X1
103143438	11.4086	0	bmp8a	bone morphogenetic protein 8A
103143465	11.4881	0	srsf10	serine/arginine-rich splicing factor 10 isoform X3
103136274	11.5866	0	LOC103136274	rho-related GTP-binding protein RhoU-like
103129416	11.6078	0	LOC103129416	zinc finger protein 395-like isoform X1
103153583	11.6538	0	apip	methylthioribulose-1-phosphate dehydratase isoform X1
103129140	11.6624	0	LOC103129140	corticosteroid 11-beta-dehydrogenase isozyme 2-like
103143491	11.6732	0	naxe	NAD(P)H-hydrate epimerase
103153588	11.6843	0	slc35c1	GDP-fucose transporter 1 isoform X1
103143471	11.7328	0	LOC103143471	nucleolin 2-like
103129412	11.7508	0	gpn1	GPN-loop GTPase 1 isoform X1
103133127	11.7888	0	LOC103133127	GON-4-like protein, partial
103143439	11.8061	0	LOC103143439	zinc finger protein 706-like
103153580	11.8359	0	ttc17	tetratricopeptide repeat protein 17 isoform X1
103131647	11.8409	0	LOC103131647	ras-related protein Rab-8B
103142700	11.8555	0	iqgap1	ras GTPase-activating-like protein IQGAP1
103154978	11.898	0	ncdn	neurochondrin
103156205	11.9114	0	LOC103156205	calcipressin-1-like
103130009	11.925	0	LOC103130009	doublesex- and mab-3-related transcription factor C2-like isoform X1
103142624	11.9634	0	htatip2	oxidoreductase HTATIP2 isoform X1
103143476	12.0104	0	tmem170b	transmembrane protein 170B
103151123	12.0732	0	tipin	TIMELESS-interacting protein isoform X1
103130065	12.1288	0	sts	steryl-sulfatase
103136742	12.1292	0	mrpl51	39S ribosomal protein L51, mitochondrial
103130564	12.1614	0	scaf1	splicing factor, arginine/serine-rich 19
103141198	12.1829	0	smc5	structural maintenance of chromosomes protein 5 isoform X1
103142683	12.2075	0	LOC103142683	THAP domain-containing protein 6-like
103147396	12.2584	0	ccdc97	coiled-coil domain-containing protein 97 isoform X1
103154979	12.3398	0	psmb2	proteasome subunit beta type-2
103155211	12.3762	0	LOC103155211	beta-1,3-galactosyltransferase 1-like isoform X4
103143455	12.3801	0	tceb3	transcription elongation factor B polypeptide 3 isoform X1
103143433	12.4864	0	LOC103143433	sodium/potassium-transporting ATPase subunit alpha-3-like
103143454	12.5688	0	pithd1	PITH domain-containing protein 1
103129421	12.6091	0	nob1	RNA-binding protein NOB1
103143501	12.6164	0	cdca8	borealin isoform X1
103131161	12.6637	0	LOC103131161	ras-related protein Rab-11A
103153581	12.7021	0	hsd17b12	very-long-chain 3-oxoacyl-CoA reductase
103142641	12.7025	0	LOC103142641	C-myc promoter-binding protein-like isoform X7
103142320	12.7117	0	samd8	sphingomyelin synthase-related protein 1
103156200	12.7462	0	fam207a	protein FAM207A
103154971	12.8017	0	meaf6	chromatin modification-related protein MEAF6 isoform X2
103129653	12.8516	0	emc7	ER membrane protein complex subunit 7
103129408	12.8808	0	cog8	conserved oligomeric Golgi complex subunit 8
103154980	12.8968	0	cdca5	sororin
103130006	12.92	0	LOC103130006	uncharacterized protein LOC103130006
103131153	12.927	0	LOC103131153	uncharacterized protein LOC103131153
103131648	12.9327	0	LOC103131648	puratrophin-1-like isoform X1
103130393	13.0478	0	msto1	protein misato homolog 1
103156198	13.0921	0	cep70	centrosomal protein of 70 kDa isoform X6
103131158	13.1686	0	herc1	probable E3 ubiquitin-protein ligase HERC1 isoform X13
103131649	13.2139	0	katnb1	katanin p80 WD40 repeat-containing subunit B1
103142319	13.5072	0	LOC103142319	voltage-dependent anion-selective channel protein 2
103154963	13.6223	0	LOC103154963	eyes absent homolog 3-like isoform X1
103154567	13.7712	0	slc44a4	choline transporter-like protein 4 isoform X1
103137517	14.0822	0	LOC103137517	uncharacterized protein LOC103137517 isoform X1
103141681	15.7322	0	LOC103141681	ADP/ATP translocase 3
103142377	-12.4592	1.10691	LOC103142377	cbp/p300-interacting transactivator 3-like
103142400	-11.246	1.02703	LOC103142400	septin-7-like isoform X1
103142393	-9.61216	0.640165	nr1d2	nuclear receptor subfamily 1 group D member 2
103131852	-9.20889	6.0189	LOC103131852	uncharacterized protein LOC103131852 isoform X2
103142380	-5.73679	0.979621	LOC103142380	replication protein A 32 kDa subunit-like
103153272	-5.41088	0.509427	LOC103153272	protein delta homolog 1 isoform X1
103151031	-4.76385	9.83536	ddx55	ATP-dependent RNA helicase DDX55
103155985	-4.03624	1.05014	maea	macrophage erythroblast attacher isoform X2
103135356	-3.9526	1.8179	prune2	protein prune homolog 2 isoform X1
103132423	-3.82689	1.99947	LOC103132423	matrin-3-like
103131862	-3.01271	1.31363	LOC103131862	arfaptin-1-like isoform X2
103146428	-2.43271	3.0984	LOC103146428	protein shisa-7-like isoform X1
103155995	-2.39202	1.04272	LOC103155995	ATP-binding cassette sub-family A member 1-like
103151032	-2.34079	11.6495	eif2b1	translation initiation factor eIF-2B subunit alpha isoform X1
103131702	-2.13143	10.3372	LOC103131702	serpin H1-like
103156457	-1.94421	0.935204	itm2b	integral membrane protein 2B isoform X1
103142387	-1.61633	0.698576	sf3a3	splicing factor 3A subunit 3
103137353	-1.56618	1.55207	LOC103137353	alcohol dehydrogenase class-3 isoform X2
103134798	-1.38801	1.44209	hpx	hemopexin isoform X1
103155317	-0.726484	0.468016	LOC103155317	filamin-A-like isoform X1
103141930	0.464535	-0.448424	LOC103141930	tubulin beta-1 chain
103135683	0.655668	-10.1972	r3hdm2	R3H domain-containing protein 2 isoform X2
103129361	0.731917	-4.04836	LOC103129361	GC-rich sequence DNA-binding factor 2-like isoform X3
103148112	0.764192	-2.64486	LOC103148112	von Willebrand factor A domain-containing protein 5A-like isoform X1
103154557	0.939037	-1.69118	LOC103154557	lymphocyte antigen 6 complex locus protein G6d-like
103133668	0.988021	-0.636959	LOC103133668	carboxylesterase 1E-like
103156378	1.00283	-1.70292	eef1akmt1	protein-lysine N-methyltransferase N6AMT2
103141874	1.00492	-1.37676	LOC103141874	deoxynucleoside triphosphate triphosphohydrolase SAMHD1-like
103154986	1.0967	-1.39781	LOC103154986	protein argonaute-4 isoform X1
103147945	1.15379	-2.06631	vps45	vacuolar protein sorting-associated protein 45 isoform X1
103151911	1.20812	-7.34869	LOC103151911	insulin receptor substrate 2-B-like
103152332	1.28108	-1.58596	LOC103152332	uncharacterized protein LOC103152332
103148856	1.33226	-1.85054	ache	acetylcholinesterase
103129471	1.34656	-2.03774	abi3bp	target of Nesh-SH3 isoform X12
103140974	1.40526	-0.456123	LOC103140974	guanine nucleotide-binding protein G(o) subunit alpha-like
103154974	1.43827	-0.780783	LOC103154974	ras-related GTP-binding protein C-like
103154476	1.5881	-1.05234	ltv1	protein LTV1 homolog isoform X2
103152857	1.59808	-5.24342	LOC103152857	uncharacterized protein LOC103152857 isoform X1
103146569	1.91029	-5.02409	shd	SH2 domain-containing adapter protein D isoform X1
103129463	1.93318	-3.26015	LOC103129463	sorting nexin-9-like
103134735	2.1317	-1.2827	LOC103134735	ES1 protein homolog, mitochondrial-like
103153895	2.16751	-2.80215	LOC103153895	uncharacterized protein C2orf47 homolog, mitochondrial-like
103135885	2.17526	-1.02956	LOC103135885	cell division cycle-associated protein 7-like isoform X1
103156607	2.24345	-4.70354	LOC103156607	chromatin complexes subunit BAP18 isoform X1
103154106	2.31178	-3.08306	LOC103154106	protein Shroom2-like isoform X1
103129474	2.45025	-2.74779	ftcd	formimidoyltransferase-cyclodeaminase
103143452	2.54613	-0.869472	LOC103143452	non-POU domain-containing octamer-binding protein isoform X2
103156060	2.60009	-0.627783	LOC103156060	cationic trypsin-like isoform X1
103147217	2.61319	-3.04626	LOC103147217	OX-2 membrane glycoprotein-like isoform X2
103149398	2.69045	-2.38632	glis3	zinc finger protein GLIS3 isoform X1
103155116	2.80477	-1.96354	LOC103155116	dyslexia-associated protein KIAA0319 homolog isoform X6
103154994	3.03352	-2.61606	LOC103154994	prolyl endopeptidase-like
103153448	3.04973	-0.611751	kmt5b	histone-lysine N-methyltransferase KMT5B
103136220	3.09151	-1.90186	LOC103136220	transmembrane protease serine 4 isoform X1
103130395	3.23003	-0.950437	dpy19l4	probable C-mannosyltransferase DPY19L4 isoform X1
103154477	3.41332	-2.34218	LOC103154477	uncharacterized protein LOC103154477
103151511	3.96049	-1.73786	stk38l	serine/threonine-protein kinase 38-like
103149723	4.13127	-1.05415	LOC103149723	uncharacterized protein LOC103149723
103150179	4.13259	-12.0375	sytl4	synaptotagmin-like protein 4 isoform X3
103154999	4.48486	-0.817016	LOC103154999	uncharacterized protein LOC103154999 isoform X2
103142463	4.48682	-0.974498	LOC103142463	uncharacterized protein LOC103142463 isoform X3
103141792	4.71125	-2.86729	ubox5	RING finger protein 37
103143484	9.00993	-0.975068	LOC103143484	probable ATP-dependent RNA helicase ddx6
103137512	9.64101	-3.98514	LOC103137512	uncharacterized protein LOC103137512
103152110	9.96351	-4.29327	LOC103152110	gamma-glutamylaminecyclotransferase C-like isoform X2
103131603	10.0762	-0.780765	rfc4	replication factor C subunit 4
103142647	10.2549	-2.01723	gch1	GTP cyclohydrolase 1
103154107	11.052	-8.1346	sumo1	small ubiquitin-related modifier 1
103132862	11.1106	-2.03121	LOC103132862	bifunctional endoribonuclease and deubiquitinase ZC3H12A-like
103149877	11.1616	-2.01756	wdr76	WD repeat-containing protein 76
103153585	11.6767	-2.28746	LOC103153585	excitatory amino acid transporter 2-like
103131651	13.3217	-0.82882	kifc3	kinesin-like protein KIFC3 isoform X5
