# Supplementary material for: Fixation of allelic gene expression landscapes and expression bias pattern shape the transcriptome of the clonal Amazon molly
Source: HighWire-hosted journal article supplement (doi:10.1101/gr.268870.120), 2021-02-05
Supplement: Supplemental_Table_S7.xlsx [file Supplemental_Table_S7.xlsx]

## Sheet: 工作表1
Supplemental Table S7. PCR test result of genetic composition of monoallelic expressed P. formosa loci
	product length (bp)
	#1	#2	#3	#4	#5	#6	#7
P. mexicana	487	486	513	344	452	354	527
P. latipinna	505	482	510	344	452	354	527
P. formosa	487/505	486/482	513/510	344*	452*	354*	527*
	* Heterozygosity was recognized from double peaks in the sequence chromatogram
	PCR products were column purified (GenElute™ PCR Clean-Up Kit, Sigma-Aldrich #NA1020) and custom sequenced (MWG, Ebersberg, Germany)
