# Supplementary material for: Fixation of allelic gene expression landscapes and expression bias pattern shape the transcriptome of the clonal Amazon molly
Source: HighWire-hosted journal article supplement (doi:10.1101/gr.268870.120), 2021-02-05
Supplement: Supplemental_Table_S8.xlsx [file Supplemental_Table_S8.xlsx]

## Sheet: Sheet1
Supplemental Table S8. Genes exhibiting different allelic expression patterns in all organs
Brain						Liver						Ovary
geneID	clonal [log(p.lat/p. mex)]	f1 [log(p.lat/p. mex)]	Locus	Protein.name		geneID	clonal [log(p.lat/p. mex)]	f1 [log(p.lat/p. mex)]	Locus	Protein.name		geneID	clonal [log(p.lat/p. mex)]	f1 [log(p.lat/p. mex)]	Locus	Protein.name
103129140	11.1206	0	LOC103129140	corticosteroid 11-beta-dehydrogenase isozyme 2-like		103129140	10.0186	0	LOC103129140	corticosteroid 11-beta-dehydrogenase isozyme 2-like		103129140	11.6624	0	LOC103129140	corticosteroid 11-beta-dehydrogenase isozyme 2-like
103129408	11.3791	0	cog8	conserved oligomeric Golgi complex subunit 8		103129408	10.3424	0	cog8	conserved oligomeric Golgi complex subunit 8		103129408	12.8808	0	cog8	conserved oligomeric Golgi complex subunit 8
103129412	11.2278	0	gpn1	GPN-loop GTPase 1 isoform X1		103129412	10.6759	0	gpn1	GPN-loop GTPase 1 isoform X1		103129412	11.7508	0	gpn1	GPN-loop GTPase 1 isoform X1
103129420	8.19633	0	anxa2	annexin A2		103129420	10.3654	0	anxa2	annexin A2		103129420	9.79501	0	anxa2	annexin A2
103129745	4.42389	0	katnbl1	KATNB1-like protein 1 isoform X1		103129745	3.75075	0	katnbl1	KATNB1-like protein 1 isoform X1		103129745	3.55818	0	katnbl1	KATNB1-like protein 1 isoform X1
103130045	-1.43797	0	eif5a2	eukaryotic translation initiation factor 5A-2		103130045	-1.37952	0	eif5a2	eukaryotic translation initiation factor 5A-2		103130045	-1.30779	0	eif5a2	eukaryotic translation initiation factor 5A-2
103130066	3.45581	0	LOC103130066	protein SON isoform X1		103130066	3.74994	0	LOC103130066	protein SON isoform X1		103130066	4.03572	0	LOC103130066	protein SON isoform X1
103130096	-9.14352	0	LOC103130096	histone-lysine N-methyltransferase SETDB2		103130096	-9.07036	0	LOC103130096	histone-lysine N-methyltransferase SETDB2		103130096	-10.813	0	LOC103130096	histone-lysine N-methyltransferase SETDB2
103130097	-3.05234	0	creg1	protein CREG1		103130097	-2.9201	0	creg1	protein CREG1		103130097	-2.99063	0	creg1	protein CREG1
103130300	0	12.1068	ssu72	RNA polymerase II subunit A C-terminal domain phosphatase SSU72		103130300	0	10.7862	ssu72	RNA polymerase II subunit A C-terminal domain phosphatase SSU72		103130300	0	13.1594	ssu72	RNA polymerase II subunit A C-terminal domain phosphatase SSU72
103130388	11.3263	0	smim13	small integral membrane protein 13		103130388	11.0436	0	smim13	small integral membrane protein 13		103130388	10.822	0	smim13	small integral membrane protein 13
103130393	11.842	0	msto1	protein misato homolog 1		103130393	10.3916	0	msto1	protein misato homolog 1		103130393	13.0478	0	msto1	protein misato homolog 1
103130563	10.5648	0	snrnp70	U1 small nuclear ribonucleoprotein 70 kDa		103130563	11.0089	0	snrnp70	U1 small nuclear ribonucleoprotein 70 kDa		103130563	10.5468	0	snrnp70	U1 small nuclear ribonucleoprotein 70 kDa
103130785	-2.58165	1.42109	LOC103130785	LOW QUALITY PROTEIN: mastermind-like protein 1	#	103130785	-2.70871	0	LOC103130785	LOW QUALITY PROTEIN: mastermind-like protein 1	#	103130785	-2.80085	0	LOC103130785	LOW QUALITY PROTEIN: mastermind-like protein 1	#
103130802	0	-4.2801	pdhb	pyruvate dehydrogenase E1 component subunit beta, mitochondrial		103130802	0	-4.53257	pdhb	pyruvate dehydrogenase E1 component subunit beta, mitochondrial		103130802	0	-4.44837	pdhb	pyruvate dehydrogenase E1 component subunit beta, mitochondrial
103130829	11.2205	0	efl1	elongation factor-like GTPase 1 isoform X1		103130829	9.70306	0	efl1	elongation factor-like GTPase 1 isoform X1		103130829	10.7984	0	efl1	elongation factor-like GTPase 1 isoform X1
103130892	1.65314	0	hsd17b10	3-hydroxyacyl-CoA dehydrogenase type-2		103130892	1.80758	0	hsd17b10	3-hydroxyacyl-CoA dehydrogenase type-2		103130892	1.99149	0	hsd17b10	3-hydroxyacyl-CoA dehydrogenase type-2
103130915	-3.25606	0	LOC103130915	zinc finger protein 281-like		103130915	-3.24149	0	LOC103130915	zinc finger protein 281-like		103130915	-3.70553	0	LOC103130915	zinc finger protein 281-like
103131153	10.6167	0	LOC103131153	uncharacterized protein LOC103131153		103131153	8.86407	0	LOC103131153	uncharacterized protein LOC103131153		103131153	12.927	0	LOC103131153	uncharacterized protein LOC103131153
103131158	13.169	0	herc1	probable E3 ubiquitin-protein ligase HERC1 isoform X13	#	103131158	12.8524	-0.779535	herc1	probable E3 ubiquitin-protein ligase HERC1 isoform X13	#	103131158	13.1686	0	herc1	probable E3 ubiquitin-protein ligase HERC1 isoform X13	#
103131161	12.3654	0	LOC103131161	ras-related protein Rab-11A		103131161	10.5393	0	LOC103131161	ras-related protein Rab-11A		103131161	12.6637	0	LOC103131161	ras-related protein Rab-11A
103131209	-11.0863	0	nfkb1	LOW QUALITY PROTEIN: nuclear factor NF-kappa-B p105 subunit		103131209	-11.0571	0	nfkb1	LOW QUALITY PROTEIN: nuclear factor NF-kappa-B p105 subunit		103131209	-8.94528	0	nfkb1	LOW QUALITY PROTEIN: nuclear factor NF-kappa-B p105 subunit
103131216	-12.5255	0	LOC103131216	selenoprotein T2-like		103131216	-10.9135	0	LOC103131216	selenoprotein T2-like		103131216	-9.55251	0	LOC103131216	selenoprotein T2-like
103131217	-9.50153	0	LOC103131217	mitochondrial inner membrane protein COX18 isoform X1		103131217	-8.85937	0	LOC103131217	mitochondrial inner membrane protein COX18 isoform X1		103131217	-9.88552	0	LOC103131217	mitochondrial inner membrane protein COX18 isoform X1
103131222	-11.8452	0	tbc1d9b	TBC1 domain family member 9B isoform X2		103131222	-11.5466	0	tbc1d9b	TBC1 domain family member 9B isoform X2		103131222	-11.4539	0	tbc1d9b	TBC1 domain family member 9B isoform X2
103131304	3.19909	0	derl2	derlin-2		103131304	8.59691	0	derl2	derlin-2		103131304	3.93001	0	derl2	derlin-2
103131393	3.5674	0	LOC103131393	calcium-transporting ATPase type 2C member 1-like isoform X3		103131393	3.47501	0	LOC103131393	calcium-transporting ATPase type 2C member 1-like isoform X3		103131393	3.72902	0	LOC103131393	calcium-transporting ATPase type 2C member 1-like isoform X3
103131394	3.58147	0	pik3r4	phosphoinositide 3-kinase regulatory subunit 4 isoform X1		103131394	3.45149	0	pik3r4	phosphoinositide 3-kinase regulatory subunit 4 isoform X1		103131394	3.36139	0	pik3r4	phosphoinositide 3-kinase regulatory subunit 4 isoform X1
103131459	-10.0205	0	LOC103131459	CTD small phosphatase-like protein 2-A isoform X2		103131459	-11.4452	0	LOC103131459	CTD small phosphatase-like protein 2-A isoform X2		103131459	-13.3794	0	LOC103131459	CTD small phosphatase-like protein 2-A isoform X2
103131515	11.4419	0	LOC103131515	eukaryotic translation initiation factor 3 subunit E-B		103131515	9.43256	0	LOC103131515	eukaryotic translation initiation factor 3 subunit E-B		103131515	11.1649	0	LOC103131515	eukaryotic translation initiation factor 3 subunit E-B
103131519	11.4264	0	nudcd1	nudC domain-containing protein 1 isoform X1		103131519	10.5004	0	nudcd1	nudC domain-containing protein 1 isoform X1		103131519	11.3841	0	nudcd1	nudC domain-containing protein 1 isoform X1
103131539	10.6821	0	vps13c	vacuolar protein sorting-associated protein 13C		103131539	11.8976	0	vps13c	vacuolar protein sorting-associated protein 13C		103131539	10.77	0	vps13c	vacuolar protein sorting-associated protein 13C
103131647	12.0015	0	LOC103131647	ras-related protein Rab-8B		103131647	10.9319	0	LOC103131647	ras-related protein Rab-8B		103131647	11.8409	0	LOC103131647	ras-related protein Rab-8B
103131649	12.5622	0	katnb1	katanin p80 WD40 repeat-containing subunit B1		103131649	10.6694	0	katnb1	katanin p80 WD40 repeat-containing subunit B1		103131649	13.2139	0	katnb1	katanin p80 WD40 repeat-containing subunit B1
103131651	12.1833	0	kifc3	kinesin-like protein KIFC3 isoform X5	#	103131651	9.61399	0	kifc3	kinesin-like protein KIFC3 isoform X5	#	103131651	13.3217	-0.82882	kifc3	kinesin-like protein KIFC3 isoform X5	#
103131721	4.51245	0	LOC103131721	ras GTPase-activating-like protein IQGAP1		103131721	4.86402	0	LOC103131721	ras GTPase-activating-like protein IQGAP1		103131721	4.70109	0	LOC103131721	ras GTPase-activating-like protein IQGAP1
103131810	10.4427	0	LOC103131810	CKLF-like MARVEL transmembrane domain-containing protein 6, partial		103131810	9.90088	0	LOC103131810	CKLF-like MARVEL transmembrane domain-containing protein 6, partial		103131810	9.67685	0	LOC103131810	CKLF-like MARVEL transmembrane domain-containing protein 6, partial
103132345	4.43099	0	gpatch1	G patch domain-containing protein 1		103132345	4.86435	0	gpatch1	G patch domain-containing protein 1		103132345	4.7869	0	gpatch1	G patch domain-containing protein 1
103132422	-5.17662	0	LOC103132422	matrin-3-like isoform X1		103132422	-5.07371	0	LOC103132422	matrin-3-like isoform X1		103132422	-5.18982	0	LOC103132422	matrin-3-like isoform X1
103132424	-12.1684	0	LOC103132424	polyadenylate-binding protein-interacting protein 2		103132424	-11.0244	0	LOC103132424	polyadenylate-binding protein-interacting protein 2		103132424	-11.8541	0	LOC103132424	polyadenylate-binding protein-interacting protein 2
103133584	-3.19779	0	cog2	conserved oligomeric Golgi complex subunit 2 isoform X1		103133584	-2.94556	0	cog2	conserved oligomeric Golgi complex subunit 2 isoform X1		103133584	-3.05302	0	cog2	conserved oligomeric Golgi complex subunit 2 isoform X1
103133852	-3.10097	0	LOC103133852	flotillin-2a isoform X2		103133852	-3.20479	0	LOC103133852	flotillin-2a isoform X2		103133852	-2.99611	0	LOC103133852	flotillin-2a isoform X2
103134617	0.798622	0	rps10	40S ribosomal protein S10		103134617	0.801316	0	rps10	40S ribosomal protein S10		103134617	0.732215	0	rps10	40S ribosomal protein S10
103135431	0	12.8931	plk2	serine/threonine-protein kinase PLK2		103135431	0	11.4517	plk2	serine/threonine-protein kinase PLK2		103135431	0	9.52371	plk2	serine/threonine-protein kinase PLK2
103135526	0	-7.60518	rbm22	pre-mRNA-splicing factor RBM22		103135526	0	-8.02203	rbm22	pre-mRNA-splicing factor RBM22		103135526	0	-7.12527	rbm22	pre-mRNA-splicing factor RBM22
103135693	-2.39399	0	atp6v1h	V-type proton ATPase subunit H isoform X2		103135693	-2.08241	0	atp6v1h	V-type proton ATPase subunit H isoform X2		103135693	-2.51103	0	atp6v1h	V-type proton ATPase subunit H isoform X2
103135880	4.96963	0	LOC103135880	proline-rich protein 13-like		103135880	4.14817	0	LOC103135880	proline-rich protein 13-like		103135880	5.20813	0	LOC103135880	proline-rich protein 13-like
103135895	-2.03724	0	LOC103135895	torsin-1A-like isoform X2		103135895	-2.18726	0	LOC103135895	torsin-1A-like isoform X2		103135895	-2.53902	0	LOC103135895	torsin-1A-like isoform X2
103136742	11.423	0	mrpl51	39S ribosomal protein L51, mitochondrial		103136742	10.5706	0	mrpl51	39S ribosomal protein L51, mitochondrial		103136742	12.1292	0	mrpl51	39S ribosomal protein L51, mitochondrial
103136744	3.56773	0	tapbpl	tapasin-related protein		103136744	9.72428	0	tapbpl	tapasin-related protein		103136744	7.89846	0	tapbpl	tapasin-related protein
103136823	0	-1.6352	LOC103136823	nectin-2-like		103136823	0	-2.2747	LOC103136823	nectin-2-like		103136823	0	-4.98457	LOC103136823	nectin-2-like
103137352	-10.4618	0	gar1	H/ACA ribonucleoprotein complex subunit 1		103137352	-9.60851	0	gar1	H/ACA ribonucleoprotein complex subunit 1		103137352	-10.4916	0	gar1	H/ACA ribonucleoprotein complex subunit 1
103137511	12.04	0	LOC103137511	vigilin-like		103137511	9.38503	0	LOC103137511	vigilin-like		103137511	10.1013	0	LOC103137511	vigilin-like
103137641	1.80338	0	ptk7	inactive tyrosine-protein kinase 7		103137641	1.75046	0	ptk7	inactive tyrosine-protein kinase 7		103137641	1.78347	0	ptk7	inactive tyrosine-protein kinase 7
103137670	-5.53072	0	gpatch11	G patch domain-containing protein 11		103137670	-5.79104	0	gpatch11	G patch domain-containing protein 11		103137670	-5.32305	0	gpatch11	G patch domain-containing protein 11
103137771	-5.32108	0	tomm6	mitochondrial import receptor subunit TOM6 homolog		103137771	-5.17776	0	tomm6	mitochondrial import receptor subunit TOM6 homolog		103137771	-5.51035	0	tomm6	mitochondrial import receptor subunit TOM6 homolog
103140163	0	-8.59037	taf7	transcription initiation factor TFIID subunit 7		103140163	0	-8.10801	taf7	transcription initiation factor TFIID subunit 7		103140163	0	-8.16537	taf7	transcription initiation factor TFIID subunit 7
103140302	4.88296	0	piga	phosphatidylinositol N-acetylglucosaminyltransferase subunit A		103140302	5.08366	0	piga	phosphatidylinositol N-acetylglucosaminyltransferase subunit A		103140302	4.79518	0	piga	phosphatidylinositol N-acetylglucosaminyltransferase subunit A
103140598	5.2816	0	LOC103140598	RNA-binding protein 4B-like		103140598	5.67537	0	LOC103140598	RNA-binding protein 4B-like		103140598	6.15671	0	LOC103140598	RNA-binding protein 4B-like
103140795	2.16649	0	krtcap2	keratinocyte-associated protein 2		103140795	2.06382	0	krtcap2	keratinocyte-associated protein 2		103140795	1.79686	0	krtcap2	keratinocyte-associated protein 2
103140869	-12.4527	0	erp44	endoplasmic reticulum resident protein 44		103140869	-12.2212	0	erp44	endoplasmic reticulum resident protein 44		103140869	-9.70909	0	erp44	endoplasmic reticulum resident protein 44
103140963	-10.1137	0	LOC103140963	synaptogyrin-2-like		103140963	-10.858	0	LOC103140963	synaptogyrin-2-like		103140963	-9.9206	0	LOC103140963	synaptogyrin-2-like
103140983	-2.23021	0	LOC103140983	ubiquitin carboxyl-terminal hydrolase 22 isoform X2		103140983	-2.9968	0	LOC103140983	ubiquitin carboxyl-terminal hydrolase 22 isoform X2		103140983	3.82823	0	LOC103140983	ubiquitin carboxyl-terminal hydrolase 22 isoform X2
103141046	-3.20258	0	psma2	proteasome subunit alpha type-2		103141046	-3.0796	0	psma2	proteasome subunit alpha type-2		103141046	-3.36729	0	psma2	proteasome subunit alpha type-2
103141198	10.7427	0	smc5	structural maintenance of chromosomes protein 5 isoform X1		103141198	9.71612	0	smc5	structural maintenance of chromosomes protein 5 isoform X1		103141198	12.1829	0	smc5	structural maintenance of chromosomes protein 5 isoform X1
103141313	-10.4537	0	athl1	acid trehalase-like protein 1		103141313	-9.95108	0	athl1	acid trehalase-like protein 1		103141313	-10.7016	0	athl1	acid trehalase-like protein 1
103141613	-8.95756	0	dxo	decapping and exoribonuclease protein		103141613	-9.07183	0	dxo	decapping and exoribonuclease protein		103141613	-10.3822	0	dxo	decapping and exoribonuclease protein
103141662	-2.21499	0	tom1l2	TOM1-like protein 2 isoform X1		103141662	-2.26637	0	tom1l2	TOM1-like protein 2 isoform X1		103141662	-1.13965	0	tom1l2	TOM1-like protein 2 isoform X1
103141681	15.2637	0	LOC103141681	ADP/ATP translocase 3		103141681	16.6693	0	LOC103141681	ADP/ATP translocase 3		103141681	15.7322	0	LOC103141681	ADP/ATP translocase 3
103142317	2.33771	0	comtd1	catechol O-methyltransferase domain-containing protein 1 isoform X2		103142317	1.40014	0	comtd1	catechol O-methyltransferase domain-containing protein 1 isoform X2		103142317	2.2431	0	comtd1	catechol O-methyltransferase domain-containing protein 1 isoform X2
103142320	12.2722	0	samd8	sphingomyelin synthase-related protein 1		103142320	9.21908	0	samd8	sphingomyelin synthase-related protein 1		103142320	12.7117	0	samd8	sphingomyelin synthase-related protein 1
103142392	-14.1601	0	LOC103142392	60S ribosomal protein L15		103142392	-12.8786	0	LOC103142392	60S ribosomal protein L15		103142392	-10.587	0	LOC103142392	60S ribosomal protein L15
103142393	-9.69403	0	nr1d2	nuclear receptor subfamily 1 group D member 2		103142393	-8.20859	0	nr1d2	nuclear receptor subfamily 1 group D member 2		103142393	-9.61216	0.640165	nr1d2	nuclear receptor subfamily 1 group D member 2
103142396	-6.50778	0	top2b	DNA topoisomerase 2-beta isoform X1		103142396	-5.89978	0	top2b	DNA topoisomerase 2-beta isoform X1		103142396	-6.48311	0	top2b	DNA topoisomerase 2-beta isoform X1
103142400	-9.38689	0	LOC103142400	septin-7-like isoform X1		103142400	-10.5872	0	LOC103142400	septin-7-like isoform X1		103142400	-11.246	1.02703	LOC103142400	septin-7-like isoform X1
103142645	5.93354	0	ero1a	ERO1-like protein alpha		103142645	5.92456	0	ero1a	ERO1-like protein alpha		103142645	5.68327	0	ero1a	ERO1-like protein alpha
103142652	11.5001	0	LOC103142652	gamma-secretase subunit Aph-1b		103142652	9.96553	0	LOC103142652	gamma-secretase subunit Aph-1b		103142652	11.2745	0	LOC103142652	gamma-secretase subunit Aph-1b
103142660	12.6942	0	atp6v0d1	V-type proton ATPase subunit d 1		103142660	10.4104	0	atp6v0d1	V-type proton ATPase subunit d 1		103142660	11.3385	0	atp6v0d1	V-type proton ATPase subunit d 1
103142700	11.5925	0	iqgap1	ras GTPase-activating-like protein IQGAP1		103142700	10.048	0	iqgap1	ras GTPase-activating-like protein IQGAP1		103142700	11.8555	0	iqgap1	ras GTPase-activating-like protein IQGAP1
103142973	4.73624	0	iqgap2	ras GTPase-activating-like protein IQGAP2		103142973	3.79005	0	iqgap2	ras GTPase-activating-like protein IQGAP2		103142973	3.73183	0	iqgap2	ras GTPase-activating-like protein IQGAP2
103143436	7.61738	0	LOC103143436	protein capicua homolog isoform X3		103143436	7.82485	0	LOC103143436	protein capicua homolog isoform X3		103143436	9.62749	0	LOC103143436	protein capicua homolog isoform X3
103143437	4.4128	0	LOC103143437	glycogen synthase kinase-3 beta-like isoform X1		103143437	4.67973	0	LOC103143437	glycogen synthase kinase-3 beta-like isoform X1		103143437	4.26309	0	LOC103143437	glycogen synthase kinase-3 beta-like isoform X1
103143439	12.2872	0	LOC103143439	zinc finger protein 706-like		103143439	11.6236	0	LOC103143439	zinc finger protein 706-like		103143439	11.8061	0	LOC103143439	zinc finger protein 706-like
103143454	10.0579	0	pithd1	PITH domain-containing protein 1		103143454	9.36311	0	pithd1	PITH domain-containing protein 1		103143454	12.5688	0	pithd1	PITH domain-containing protein 1
103143455	12.5162	0	tceb3	transcription elongation factor B polypeptide 3 isoform X1		103143455	10.6915	0	tceb3	transcription elongation factor B polypeptide 3 isoform X1		103143455	12.3801	0	tceb3	transcription elongation factor B polypeptide 3 isoform X1
103143465	13.0255	0	srsf10	serine/arginine-rich splicing factor 10 isoform X3		103143465	10.3225	0	srsf10	serine/arginine-rich splicing factor 10 isoform X3		103143465	11.4881	0	srsf10	serine/arginine-rich splicing factor 10 isoform X3
103143467	3.6421	0	LOC103143467	Na(+)/H(+) exchanger beta-like		103143467	3.415	0	LOC103143467	Na(+)/H(+) exchanger beta-like		103143467	3.38686	0	LOC103143467	Na(+)/H(+) exchanger beta-like
103143471	12.6106	0	LOC103143471	nucleolin 2-like		103143471	9.43773	0	LOC103143471	nucleolin 2-like		103143471	11.7328	0	LOC103143471	nucleolin 2-like
103143491	11.3735	0	naxe	NAD(P)H-hydrate epimerase		103143491	11.9626	0	naxe	NAD(P)H-hydrate epimerase		103143491	11.6732	0	naxe	NAD(P)H-hydrate epimerase
103143494	11.9434	0	LOC103143494	zinc finger and BTB domain-containing protein 22-like		103143494	10.726	0	LOC103143494	zinc finger and BTB domain-containing protein 22-like		103143494	10.691	0	LOC103143494	zinc finger and BTB domain-containing protein 22-like
103143498	9.98962	0	tpmt	thiopurine S-methyltransferase		103143498	9.95649	0	tpmt	thiopurine S-methyltransferase		103143498	11.1285	0	tpmt	thiopurine S-methyltransferase
103143508	4.82656	0	LOC103143508	LOW QUALITY PROTEIN: uncharacterized protein LOC103143508		103143508	5.64345	0	LOC103143508	LOW QUALITY PROTEIN: uncharacterized protein LOC103143508		103143508	5.16009	0	LOC103143508	LOW QUALITY PROTEIN: uncharacterized protein LOC103143508
103145074	1.14346	0	LOC103145074	cytochrome c oxidase subunit 7C, mitochondrial		103145074	1.0829	0	LOC103145074	cytochrome c oxidase subunit 7C, mitochondrial		103145074	1.28315	0	LOC103145074	cytochrome c oxidase subunit 7C, mitochondrial
103145425	2.23915	0	xpo6	exportin-6		103145425	2.55828	0	xpo6	exportin-6		103145425	2.38711	0	xpo6	exportin-6
103146427	-3.28001	0	LOC103146427	CCR4-NOT transcription complex subunit 3-like		103146427	-3.72735	0	LOC103146427	CCR4-NOT transcription complex subunit 3-like		103146427	-3.19116	0	LOC103146427	CCR4-NOT transcription complex subunit 3-like
103146978	-4.65073	0	impad1	inositol monophosphatase 3		103146978	-4.49517	0	impad1	inositol monophosphatase 3		103146978	-3.82709	0	impad1	inositol monophosphatase 3
103147396	10.8583	0	ccdc97	coiled-coil domain-containing protein 97 isoform X1		103147396	9.20106	0	ccdc97	coiled-coil domain-containing protein 97 isoform X1		103147396	12.2584	0	ccdc97	coiled-coil domain-containing protein 97 isoform X1
103147725	4.4925	0	LOC103147725	redox-regulatory protein FAM213A-like isoform X1		103147725	4.02896	0	LOC103147725	redox-regulatory protein FAM213A-like isoform X1		103147725	3.92836	0	LOC103147725	redox-regulatory protein FAM213A-like isoform X1
103147727	10.3638	0	LOC103147727	leucine zipper putative tumor suppressor 2 homolog		103147727	9.93388	0	LOC103147727	leucine zipper putative tumor suppressor 2 homolog		103147727	6.84678	0	LOC103147727	leucine zipper putative tumor suppressor 2 homolog
103149700	5.71735	0	LOC103149700	CD151 antigen-like		103149700	6.17041	0	LOC103149700	CD151 antigen-like		103149700	7.77084	0	LOC103149700	CD151 antigen-like
103149752	7.41469	0	rps18	40S ribosomal protein S18		103149752	7.89324	0	rps18	40S ribosomal protein S18		103149752	7.42518	0	rps18	40S ribosomal protein S18
103149753	3.47027	0	ring1	E3 ubiquitin-protein ligase RING1 isoform X2		103149753	3.96862	0	ring1	E3 ubiquitin-protein ligase RING1 isoform X2		103149753	3.36094	0	ring1	E3 ubiquitin-protein ligase RING1 isoform X2
103150174	0	-4.9197	cstf2	cleavage stimulation factor subunit 2		103150174	0	-4.56883	cstf2	cleavage stimulation factor subunit 2		103150174	0	-4.01712	cstf2	cleavage stimulation factor subunit 2
103150384	3.43611	0	cpvl	probable serine carboxypeptidase CPVL		103150384	3.86456	0	cpvl	probable serine carboxypeptidase CPVL		103150384	3.55823	0	cpvl	probable serine carboxypeptidase CPVL
103151028	-10.9299	0	denr	density-regulated protein isoform X3		103151028	-9.98684	0	denr	density-regulated protein isoform X3		103151028	-13.2241	0	denr	density-regulated protein isoform X3
103151031	-5.1532	5.59203	ddx55	ATP-dependent RNA helicase DDX55	#	103151031	0	9.58752	ddx55	ATP-dependent RNA helicase DDX55	#	103151031	-4.76385	9.83536	ddx55	ATP-dependent RNA helicase DDX55	#
103151130	11.8294	0	arfgap2	ADP-ribosylation factor GTPase-activating protein 2 isoform X2		103151130	9.33263	0	arfgap2	ADP-ribosylation factor GTPase-activating protein 2 isoform X2		103151130	9.01305	0	arfgap2	ADP-ribosylation factor GTPase-activating protein 2 isoform X2
103151135	4.26782	0	LOC103151135	golgin subfamily B member 1-like isoform X3		103151135	3.98772	0	LOC103151135	golgin subfamily B member 1-like isoform X3		103151135	4.27574	0	LOC103151135	golgin subfamily B member 1-like isoform X3
103151145	3.04162	0	LOC103151145	DIS3-like exonuclease 1		103151145	3.34489	0	LOC103151145	DIS3-like exonuclease 1		103151145	2.68111	0	LOC103151145	DIS3-like exonuclease 1
103152332	0	-4.95883	LOC103152332	uncharacterized protein LOC103152332	#	103152332	0	-5.79414	LOC103152332	uncharacterized protein LOC103152332	#	103152332	1.28108	-1.58596	LOC103152332	uncharacterized protein LOC103152332	#
103153448	2.88094	0	kmt5b	histone-lysine N-methyltransferase KMT5B	#	103153448	2.91814	0	kmt5b	histone-lysine N-methyltransferase KMT5B	#	103153448	3.04973	-0.611751	kmt5b	histone-lysine N-methyltransferase KMT5B	#
103153455	12.1567	0	LOC103153455	gamma-aminobutyric acid receptor-associated protein-like 2		103153455	10.7617	0	LOC103153455	gamma-aminobutyric acid receptor-associated protein-like 2		103153455	10.515	0	LOC103153455	gamma-aminobutyric acid receptor-associated protein-like 2
103153473	-4.68965	0	vps13d	LOW QUALITY PROTEIN: vacuolar protein sorting-associated protein 13D		103153473	-4.91683	0	vps13d	LOW QUALITY PROTEIN: vacuolar protein sorting-associated protein 13D		103153473	-4.94583	0	vps13d	LOW QUALITY PROTEIN: vacuolar protein sorting-associated protein 13D
103153580	8.45299	0	ttc17	tetratricopeptide repeat protein 17 isoform X1		103153580	10.4835	0	ttc17	tetratricopeptide repeat protein 17 isoform X1		103153580	11.8359	0	ttc17	tetratricopeptide repeat protein 17 isoform X1
103153581	12.4118	0	hsd17b12	very-long-chain 3-oxoacyl-CoA reductase	#	103153581	13.0973	-0.626258	hsd17b12	very-long-chain 3-oxoacyl-CoA reductase	#	103153581	12.7021	0	hsd17b12	very-long-chain 3-oxoacyl-CoA reductase	#
103153583	10.6189	0	apip	methylthioribulose-1-phosphate dehydratase isoform X1		103153583	10.0545	0	apip	methylthioribulose-1-phosphate dehydratase isoform X1		103153583	11.6538	0	apip	methylthioribulose-1-phosphate dehydratase isoform X1
103153916	-4.57451	0	LOC103153916	interferon alpha/beta receptor 2-like isoform X1		103153916	-4.92022	0	LOC103153916	interferon alpha/beta receptor 2-like isoform X1		103153916	-4.79542	0	LOC103153916	interferon alpha/beta receptor 2-like isoform X1
103154107	11.4029	-9.76518	sumo1	small ubiquitin-related modifier 1		103154107	10.2715	-7.34205	sumo1	small ubiquitin-related modifier 1		103154107	11.052	-8.1346	sumo1	small ubiquitin-related modifier 1
103154126	-3.1466	0	dnpep	aspartyl aminopeptidase isoform X1		103154126	-2.98157	0	dnpep	aspartyl aminopeptidase isoform X1		103154126	-4.27737	0	dnpep	aspartyl aminopeptidase isoform X1
103154763	1.19184	0	nars	asparagine--tRNA ligase, cytoplasmic isoform X1		103154763	1.44675	0	nars	asparagine--tRNA ligase, cytoplasmic isoform X1		103154763	1.74793	0	nars	asparagine--tRNA ligase, cytoplasmic isoform X1
103154963	13.2104	0	LOC103154963	eyes absent homolog 3-like isoform X1		103154963	11.5571	0	LOC103154963	eyes absent homolog 3-like isoform X1		103154963	13.6223	0	LOC103154963	eyes absent homolog 3-like isoform X1
103154971	12.443	0	meaf6	chromatin modification-related protein MEAF6 isoform X2		103154971	9.86294	0	meaf6	chromatin modification-related protein MEAF6 isoform X2		103154971	12.8017	0	meaf6	chromatin modification-related protein MEAF6 isoform X2
103154976	11.4045	0	ppt1	palmitoyl-protein thioesterase 1		103154976	11.6701	0	ppt1	palmitoyl-protein thioesterase 1		103154976	10.2149	0	ppt1	palmitoyl-protein thioesterase 1
103154978	9.765	0	ncdn	neurochondrin		103154978	9.13815	0	ncdn	neurochondrin		103154978	11.898	0	ncdn	neurochondrin
103154979	12.3482	0	psmb2	proteasome subunit beta type-2		103154979	11.5414	0	psmb2	proteasome subunit beta type-2		103154979	12.3398	0	psmb2	proteasome subunit beta type-2
103154986	0.954548	-1.17743	LOC103154986	protein argonaute-4 isoform X1		103154986	1.0538	-1.29735	LOC103154986	protein argonaute-4 isoform X1		103154986	1.0967	-1.39781	LOC103154986	protein argonaute-4 isoform X1
103155165	2.79341	0	LOC103155165	ras-related protein Rab-11B-like		103155165	3.51356	0	LOC103155165	ras-related protein Rab-11B-like		103155165	9.89159	0	LOC103155165	ras-related protein Rab-11B-like
103155213	13.0128	0	LOC103155213	casein kinase II subunit alpha\'-like		103155213	11.0142	0	LOC103155213	casein kinase II subunit alpha\'-like		103155213	9.56759	0	LOC103155213	casein kinase II subunit alpha\'-like
103155217	3.69339	0	psmd13	26S proteasome non-ATPase regulatory subunit 13		103155217	3.87466	0	psmd13	26S proteasome non-ATPase regulatory subunit 13		103155217	3.83507	0	psmd13	26S proteasome non-ATPase regulatory subunit 13
103155911	-4.92105	0	LOC103155911	serine/arginine repetitive matrix protein 2-like isoform X2		103155911	-5.14591	0	LOC103155911	serine/arginine repetitive matrix protein 2-like isoform X2		103155911	-5.28591	0	LOC103155911	serine/arginine repetitive matrix protein 2-like isoform X2
103155965	-2.70371	0	LOC103155965	protein NipSnap homolog 3B-like		103155965	-2.95115	0	LOC103155965	protein NipSnap homolog 3B-like		103155965	-2.86219	0	LOC103155965	protein NipSnap homolog 3B-like
103155972	-9.81858	0	exosc3	exosome complex component RRP40		103155972	-9.22082	0	exosc3	exosome complex component RRP40		103155972	-12.6662	0	exosc3	exosome complex component RRP40
103155973	-11.1882	0	b4galt1	beta-1,4-galactosyltransferase 1		103155973	-12.1819	0	b4galt1	beta-1,4-galactosyltransferase 1		103155973	-12.9176	0	b4galt1	beta-1,4-galactosyltransferase 1
103155985	-4.25474	1.53596	maea	macrophage erythroblast attacher isoform X2		103155985	-3.96157	1.68113	maea	macrophage erythroblast attacher isoform X2		103155985	-4.03624	1.05014	maea	macrophage erythroblast attacher isoform X2
103155988	-11.1419	0	LOC103155988	heterogeneous nuclear ribonucleoprotein A0-like		103155988	-12.215	0	LOC103155988	heterogeneous nuclear ribonucleoprotein A0-like		103155988	-11.8573	0	LOC103155988	heterogeneous nuclear ribonucleoprotein A0-like
103155991	-10.0118	0	fam13b	protein FAM13B isoform X7		103155991	-7.87791	0	fam13b	protein FAM13B isoform X7		103155991	-8.33086	0	fam13b	protein FAM13B isoform X7
103155997	-9.00826	0	LOC103155997	E3 ubiquitin-protein ligase RNF130-like		103155997	-8.91493	0	LOC103155997	E3 ubiquitin-protein ligase RNF130-like		103155997	-8.34179	0	LOC103155997	E3 ubiquitin-protein ligase RNF130-like
103156169	-2.30258	0	scfd1	sec1 family domain-containing protein 1		103156169	-6.00727	0	scfd1	sec1 family domain-containing protein 1		103156169	-4.82954	0	scfd1	sec1 family domain-containing protein 1
103156200	9.90911	0	fam207a	protein FAM207A		103156200	9.42362	0	fam207a	protein FAM207A		103156200	12.7462	0	fam207a	protein FAM207A
103156205	12.0789	0	LOC103156205	calcipressin-1-like		103156205	9.72855	0	LOC103156205	calcipressin-1-like		103156205	11.9114	0	LOC103156205	calcipressin-1-like
103156432	-11.3239	0	LOC103156432	phosphomannomutase 2-like		103156432	-11.562	0	LOC103156432	phosphomannomutase 2-like		103156432	-10.9194	0	LOC103156432	phosphomannomutase 2-like
103156894	7.72618	0	LOC103156894	CCAAT/enhancer-binding protein gamma		103156894	9.71002	0	LOC103156894	CCAAT/enhancer-binding protein gamma		103156894	8.0264	0	LOC103156894	CCAAT/enhancer-binding protein gamma
103129360	0	-1.69689	sccpdh	saccharopine dehydrogenase-like oxidoreductase isoform X1		103129360	0	-1.86061	sccpdh	saccharopine dehydrogenase-like oxidoreductase isoform X1		103129360	0	-1.27519	sccpdh	saccharopine dehydrogenase-like oxidoreductase isoform X1
103135683	0.842485	-10.6157	r3hdm2	R3H domain-containing protein 2 isoform X2	#	103135683	0	-9.52806	r3hdm2	R3H domain-containing protein 2 isoform X2	#	103135683	0.655668	-10.1972	r3hdm2	R3H domain-containing protein 2 isoform X2	#
103138378	0	2.02152	LOC103138378	serine/threonine-protein kinase OSR1-like		103138378	0	2.58461	LOC103138378	serine/threonine-protein kinase OSR1-like		103138378	0	3.335	LOC103138378	serine/threonine-protein kinase OSR1-like
103140149	0	-7.35188	tm9sf2	transmembrane 9 superfamily member 2 isoform X2		103140149	0	-7.82753	tm9sf2	transmembrane 9 superfamily member 2 isoform X2		103140149	0	-7.91229	tm9sf2	transmembrane 9 superfamily member 2 isoform X2
103140154	0	-2.55405	arhgef6	rho guanine nucleotide exchange factor 6 isoform X1		103140154	0	-2.78473	arhgef6	rho guanine nucleotide exchange factor 6 isoform X1		103140154	0	-2.61745	arhgef6	rho guanine nucleotide exchange factor 6 isoform X1
103142503	0	-3.27429	csnk2a2	casein kinase II subunit alpha\'		103142503	0	-3.23821	csnk2a2	casein kinase II subunit alpha\'		103142503	0	-3.34889	csnk2a2	casein kinase II subunit alpha\'
103146416	0	-3.24417	LOC103146416	zinc transporter Slc39a7-like isoform X2		103146416	0	-3.0015	LOC103146416	zinc transporter Slc39a7-like isoform X2		103146416	0	-5.94878	LOC103146416	zinc transporter Slc39a7-like isoform X2
103147544	0	1.24644	dnajc13	dnaJ homolog subfamily C member 13 isoform X7		103147544	0	1.04456	dnajc13	dnaJ homolog subfamily C member 13 isoform X7		103147544	0	1.35736	dnajc13	dnaJ homolog subfamily C member 13 isoform X7
103150175	0	-5.12591	bcorl1	BCL-6 corepressor-like protein 1 isoform X1		103150175	0	-5.42373	bcorl1	BCL-6 corepressor-like protein 1 isoform X1		103150175	0	-5.29765	bcorl1	BCL-6 corepressor-like protein 1 isoform X1
103152856	0	-3.76513	LOC103152856	septin-7 isoform X2		103152856	0	-3.33209	LOC103152856	septin-7 isoform X2		103152856	0	-3.40937	LOC103152856	septin-7 isoform X2
103153671	0	-7.26804	isg20l2	interferon-stimulated 20 kDa exonuclease-like 2 isoform X1		103153671	0	-6.19621	isg20l2	interferon-stimulated 20 kDa exonuclease-like 2 isoform X1		103153671	0	-9.41949	isg20l2	interferon-stimulated 20 kDa exonuclease-like 2 isoform X1
				#=Genes showing diverged allelic expression patterns in different organs
