# Supplementary material for: Fixation of allelic gene expression landscapes and expression bias pattern shape the transcriptome of the clonal Amazon molly
Source: HighWire-hosted journal article supplement (doi:10.1101/gr.268870.120), 2021-02-05
Supplement: Supplemental_Table_S9.xlsx [file Supplemental_Table_S9.xlsx]

## Sheet: Supplemental_Table_S8.xlsx
Supplemental_Table_S9 Transformed allelic expression of genes exhibiting different allelic expression patterns in all organs
GeneID	Brain.clonal.p.mex	Brain.clonal.p.lat	Brain.f1.p.mex	Brain.f1.p.lat	Liver.clonal.p.mex	Liver.clonal.p.lat	Liver.f1.p.mex	Liver.f1.p.lat	Ovary.clonal.p.mex	Ovary.clonal.p.lat	Ovary.f1.p.mex	Ovary.f1.p.lat
103151031	2.52607	-2.64386	-2.5009	2.85665	1.81147	-2.64386	-6.64386	2.94361	3.85898	-0.902389	-4.05889	4.06048
103135431	6.10873	6.24051	-2.25154	7.23116	3.57107	4.22188	-6.64386	4.80787	0.895303	1.32769	-6.64386	2.87971
103130300	5.27743	4.84222	-4.52838	5.98474	3.02857	2.76765	-6.64386	4.14241	5.70141	5.68187	-4.8365	6.78607
103131217	2.85997	-6.64386	1.94236	1.45593	2.23573	-6.64386	1.852	1.39323	3.24945	-6.64386	1.96717	2.07382
103140963	4.10727	-6.64386	1.62916	1.21826	4.26379	-6.64386	2.84666	2.488	3.28318	-6.64386	2.04789	1.9486
103131209	4.8953	-6.64386	2.82646	2.97453	4.46336	-6.64386	2.98368	2.74631	2.33199	-6.64386	3.57713	3.24945
103141313	3.90785	-6.64386	1.91711	1.87184	3.39369	-6.64386	-0.274622	0.214125	6.62	-4.05889	5.07724	5.29131
103155972	3.33056	-6.64386	1.99759	2.37666	2.60526	-6.64386	2.276	2.14078	6.03144	-6.64386	4.81301	4.20828
103141613	4.0365	-4.8365	2.9684	2.80254	2.49442	-6.64386	1.29866	1.49057	6.37825	-4.05889	4.30086	3.50906
103130096	4.50367	-4.8365	3.31856	3.13093	2.42895	-6.64386	1.62916	1.54926	5.97177	-4.8365	4.86592	4.89045
103153916	3.99639	-0.545824	2.79563	2.53439	3.24184	-1.68966	1.01911	0.731183	6.31079	1.51602	5.20398	4.95815
103137670	4.22959	-1.2863	3.46074	2.66145	2.46858	-3.18442	1.19745	0.62605	4.04527	-1.2863	3.36247	3.47054
103137771	4.27314	-1.04394	3.34246	3.08066	3.68762	-1.47393	3.60802	3.24438	5.1079	-0.395929	4.12391	3.98504
103142396	6.45631	-0.0588937	5.40236	5.42492	2.98368	-2.88897	2.22548	2.23573	5.65277	-0.836501	4.58406	4.51001
103156169	4.45516	2.14078	4.54081	4.41459	3.14323	-2.88897	3.78066	3.51433	4.37921	-0.444184	4.7148	4.393
103146978	5.1079	0.521051	4.25121	4.56234	3.17951	-1.47393	2.88947	3.13367	4.25248	0.333424	3.73173	3.70984
103132422	6.33646	1.16027	5.32769	4.87578	3.87381	-1.20091	2.9684	2.78171	5.47768	0.275007	4.6094	4.08831
103131459	7.04941	-2.88897	5.98626	5.92228	4.81429	-6.64386	2.72828	2.46641	6.73688	-6.64386	5.79533	5.90533
103142400	6.08076	-3.18442	4.42246	4.13832	5.74913	-4.8365	4.62702	4.16939	7.18423	-4.05889	6.14639	7.16425
103155997	6.75368	-2.25154	5.45757	5.34495	4.76341	-4.05889	4.01138	4.3512	5.47037	-2.88897	4.19061	3.9782
103155991	7.82598	-2.25154	6.96205	6.95489	4.69683	-3.18442	2.7137	2.10769	6.52058	-1.81097	5.42995	5.5549
103142393	7.49913	-2.08927	6.44477	6.32511	5.32948	-2.88897	4.15056	3.86888	7.18299	-2.4344	6.22709	6.86152
103142392	7.60796	-6.64386	5.84071	5.89304	8.82999	-4.05889	7.59353	7.65076	6.4645	-4.05889	5.76911	5.76977
103155988	7.53924	-3.55639	6.53854	6.40133	5.70764	-6.64386	6.26291	6.06917	8.66155	-3.18442	7.75094	7.60426
103132424	5.54179	-6.64386	4.27501	4.40327	4.393	-6.64386	2.86328	2.99277	5.21665	-6.64386	4.32625	4.34944
103131222	7.01803	-4.8365	4.81216	4.85183	4.91456	-6.64386	2.76412	3.21101	4.81301	-6.64386	4.30451	3.88606
103155973	4.7447	-6.64386	3.3799	3.57813	5.56407	-6.64386	5.24704	5.48306	8.00778	-4.8365	6.85406	6.80974
103151028	4.30634	-6.64386	3.60802	3.57208	3.40395	-6.64386	4.18269	4.15597	6.58774	-6.64386	5.54952	5.36405
103137352	3.89821	-6.64386	2.74989	2.93105	3.09339	-6.64386	3.82714	4.22702	6.47143	-4.05889	5.55796	5.51759
103131216	5.88411	-6.64386	4.83845	4.77312	4.27501	-6.64386	3.67732	4.0024	5.9798	-3.55639	4.64875	4.68706
103156432	4.78319	-6.64386	3.2032	3.62761	4.93239	-6.64386	4.72301	4.97315	6.19643	-4.8365	5.56636	5.33396
103140869	5.90953	-6.64386	4.547	4.38497	5.60095	-6.64386	5.11866	5.05499	6.17513	-3.55639	5.40207	5.14812
103154107	-4.05889	5.62234	5.09494	-4.52838	-6.64386	3.62761	2.8366	-4.52838	-4.05889	5.24736	4.93003	-3.18442
103153671	1.92029	2.99277	3.59415	-3.70526	1.12763	1.23879	2.52189	-3.70526	1.32769	1.20789	2.79909	-6.64386
103135683	6.26697	7.0984	7.76018	-2.80255	2.5008	3.0197	4.15731	-5.22882	6.29893	6.9514	7.62432	-2.64386
103140149	4.51159	4.53667	5.92782	-1.40864	3.8339	3.60703	4.94611	-2.80255	5.0847	5.234	6.22226	-1.68966
103140163	4.72165	4.57046	5.42772	-3.18442	2.82477	3.01078	3.53107	-4.52838	4.58556	4.65163	5.52623	-2.64386
103135526	4.19259	4.49889	5.55131	-2.03899	2.0993	2.44228	4.26003	-3.70526	4.3512	4.99932	5.35966	-1.81097
103136744	2.10769	5.67483	4.67957	4.81728	-4.8365	3.58015	-0.274622	0.443607	-2.88897	3.13914	0.469886	1.06005
103131721	-0.0218044	4.39643	2.5509	2.71736	-1.37707	3.29425	0.594549	0.106572	0.469886	5.11416	4.18864	4.4941
103140302	-0.444184	4.10308	2.03914	2.7747	-2.08927	2.56316	1.79077	1.63691	-0.971431	3.63923	3.02414	3.10601
103143437	0.333424	4.71617	3.43652	3.79978	-1.47393	2.78346	2.14622	1.96101	-0.0588937	4.13422	2.4489	3.33414
103132345	-0.0969617	4.29719	3.60802	3.09198	-1.94342	2.87971	2.55908	1.99759	-0.136062	4.62702	4.21412	3.38681
103155165	1.35614	4.15462	3.28688	4.15326	-0.494109	2.99277	2.30548	3.3613	-3.18442	5.00832	5.06867	5.54643
103142645	0.773996	6.27165	1.91711	2.1943	-1.12029	4.75141	3.11714	2.97453	-0.494109	5.17333	4.37051	3.91265
103140598	-0.176251	4.95699	3.40962	3.491	-0.836501	4.56285	3.83053	3.89174	-0.217591	5.85012	5.2681	5.24451
103129745	-0.304006	4.10727	3.01673	2.9024	-1.04394	2.64616	1.64463	1.40236	3.81096	7.35786	6.59671	6.53854
103143508	1.06005	5.78686	3.58816	3.98732	-1.20091	3.75061	1.42044	1.51602	0.970854	5.83756	4.76075	4.41346
103150384	0.835924	4.21607	3.45637	3.01376	-0.713119	3.07211	1.12212	1.45593	2.11603	5.672	4.66874	4.64587
103151145	1.95791	4.9465	3.22394	3.77891	-0.260152	2.99277	1.11103	1.39323	2.81967	5.47037	4.58256	4.30634
103131304	1.19219	4.21801	3.49313	3.05774	0.117695	3.77452	3.46945	3.22908	1.28392	4.74739	3.91982	3.93404
103135880	-0.444184	3.74255	2.61902	3.18216	-0.971431	3.05918	1.5244	2.40871	0.545968	5.18824	5.12453	5.19022
103130066	1.04264	4.45516	3.64693	3.72538	-0.713119	2.86987	2.1188	2.33914	1.93923	5.92267	5.27463	5.03386
103149753	0.664483	4.05398	3.5741	3.63149	-0.836501	2.98368	2.9988	2.79909	2.33199	5.68608	5.12763	4.95931
103153581	-6.64386	5.76779	4.81813	4.88557	-6.64386	6.45344	6.80856	6.17878	-4.05889	6.95315	6.19446	6.04023
103131158	-2.88897	8.10504	7.08509	7.14697	-4.05889	7.19953	6.7114	5.93255	-3.18442	6.96012	6.07543	6.02591
103131539	-3.18442	7.49753	6.37955	6.52372	-6.64386	5.25399	4.64058	4.27376	-4.8365	4.51001	3.78503	4.09043
103130563	-3.18442	7.38033	7.02118	6.89069	-4.05889	5.23209	4.72665	4.09958	-4.8365	4.28244	4.16471	3.78764
103142660	-4.8365	6.41507	6.01592	5.72683	-6.64386	3.7666	3.15272	2.87316	-4.8365	5.0676	4.13832	4.10098
103143465	-4.8365	6.76268	5.44659	5.52961	-4.05889	4.66306	3.59016	3.73805	-4.8365	5.18527	3.88362	4.16672
103131161	-4.05889	6.57456	5.31264	5.42604	-4.8365	4.41515	3.6373	3.79632	-4.8365	6.4138	4.91695	5.33575
103131810	-4.05889	4.14241	2.06235	2.60328	-6.64386	3.25701	0.895303	0.461179	-6.64386	3.03298	2.83491	2.0993
103129420	-4.05889	3.24184	-0.563483	1.07724	-4.05889	4.67723	1.01911	1.9855	-6.64386	3.15137	3.01525	2.58135
103143494	-6.64386	5.29957	2.0852	2.18903	-6.64386	4.08194	-1.01937	-0.79419	-6.64386	4.04745	4.72574	4.74201
103142320	-6.64386	5.62819	4.49036	4.60348	-6.64386	2.57531	0.0612002	0.128733	-4.8365	6.45179	5.16128	5.06113
103142700	-6.64386	4.94883	2.79563	3.05195	-6.64386	3.40395	0.610385	0.745596	-6.64386	5.21179	3.94111	4.38267
103147396	-4.8365	4.56438	3.22394	3.71809	-6.64386	2.55704	1.09986	1.45593	-6.64386	5.61427	4.17871	4.75676
103141198	-6.64386	4.09887	2.76765	2.93105	-6.64386	3.07211	1.35614	1.32769	-2.4344	7.37903	6.52254	6.69328
103143454	-6.64386	3.41414	2.47508	2.17845	-6.64386	2.71918	1.81147	2.07952	-4.05889	6.77656	5.35526	5.48655
103131153	-4.8365	4.31723	3.32097	3.491	-6.64386	2.22033	1.72683	1.64463	-4.8365	6.6768	5.72683	5.72479
103154978	-4.8365	3.47703	2.14622	2.07382	-6.64386	2.49442	2.05658	1.81831	-4.8365	5.62819	4.13832	4.50367
103143498	-4.8365	3.67356	1.73408	2.07382	-6.64386	3.31252	2.1021	2.35802	-4.05889	5.42492	3.84398	4.14649
103153583	-3.55639	4.37921	3.48886	3.1088	-6.64386	3.41075	2.26103	2.47508	-4.8365	5.38578	4.47314	4.30816
103131519	-4.8365	5.08576	3.57208	4.07553	-6.64386	3.85649	2.66524	2.59932	-4.05889	5.53714	3.74255	4.19456
103143436	-0.971431	6.63205	5.3011	5.50441	-2.64386	5.04045	3.6198	3.90785	-3.55639	4.59902	4.0691	3.75061
103147727	-1.94342	5.39609	3.854	4.31904	-4.05889	3.72356	1.29866	2.81967	-3.18442	3.66221	2.30305	3.12267
103149700	-0.713119	4.97315	3.35896	4.05976	-2.4344	3.64501	1.49057	1.93609	-2.88897	3.09761	3.46401	3.58916
103156894	-1.94342	5.52623	4.18004	4.22317	-4.05889	3.86641	3.03445	2.97147	-2.08927	5.89627	5.15623	4.83971
103142652	-4.8365	5.14098	3.82545	3.86888	-4.05889	3.73173	2.76765	2.4794	-2.88897	6.37043	5.76182	5.22824
103151130	-4.8365	5.56864	4.7438	4.60545	-3.55639	4.45352	4.32265	4.32145	-2.88897	6.00977	4.80658	5.06221
103129140	-6.64386	4.47638	3.66789	3.74524	-4.8365	3.93168	2.98368	2.84331	-6.64386	5.01837	1.32769	0.15056
103137511	-6.64386	5.39609	4.43029	4.6153	-6.64386	2.74093	2.02739	1.81831	-6.64386	3.45746	2.36036	2.42895
103143471	-6.64386	5.96659	4.94298	4.7845	-6.64386	2.7939	1.36551	1.34672	-6.64386	5.08895	4.01212	3.91743
103131515	-3.55639	5.68187	4.5158	4.71296	-6.64386	2.78869	2.15704	1.93609	-6.64386	4.52105	3.62761	3.44427
103153455	-4.05889	6.37043	5.37423	5.45867	-6.64386	4.1177	3.38451	2.96224	-6.64386	3.87135	2.99277	3.01525
103154976	-4.8365	5.41397	3.61589	3.73985	-6.64386	5.02614	2.86987	3.22136	-6.64386	3.57107	2.7301	3.01525
103131647	-4.8365	5.56788	3.51433	3.51433	-6.64386	4.28799	2.46641	2.06235	-6.64386	5.19712	3.90785	3.26078
103129412	-4.8365	4.988	3.61196	3.89982	-6.64386	4.0321	3.08916	3.60605	-6.64386	5.10685	3.62761	3.98504
103155213	-6.64386	6.36868	5.58326	5.30354	-6.64386	4.37051	3.59415	3.40054	-3.18442	6.38301	4.99594	5.22632
103154971	-6.64386	5.79922	4.18402	4.4957	-6.64386	3.21878	1.61353	1.95482	-4.8365	6.54435	5.03386	5.37626
103156205	-6.64386	5.43496	4.547	4.85599	-6.64386	3.08491	2.56722	2.74631	-4.8365	5.65492	4.41007	5.0492
103131651	-4.05889	6.51112	5.49591	5.73182	-6.64386	2.96993	3.42761	2.63846	-6.64386	6.67786	6.24384	5.42744
103154963	-6.64386	6.56659	4.99216	5.28021	-6.64386	4.91337	3.46945	4.15326	-6.64386	6.97854	5.46793	5.44493
103131649	-4.8365	6.33378	5.08435	4.78276	-6.64386	4.02547	3.13367	2.78869	-6.64386	6.57039	5.33842	5.0568
103154979	-4.8365	6.17463	4.80443	4.89369	-6.64386	4.89772	4.04818	3.85898	-6.64386	5.69585	5.27929	4.85225
103156200	-4.8365	3.63633	2.57531	3.05195	-4.8365	3.24184	3.10322	3.70708	-6.64386	6.10245	5.283	5.40973
103153580	-2.88897	5.4441	4.61726	4.59753	-4.8365	4.16269	3.31373	3.16618	-6.64386	5.19219	4.13832	4.04089
103143491	-4.8365	5.21859	4.09817	3.78066	-4.8365	5.71108	4.47638	4.60842	-6.64386	5.02945	4.08406	3.86146
103130388	-6.64386	4.68285	3.35426	3.2032	-6.64386	4.39985	3.67732	3.6792	-4.05889	4.91097	3.66789	3.81352
103136742	-6.64386	4.77926	3.61589	3.5269	-6.64386	3.92695	3.89012	3.47379	-4.8365	5.83314	4.82706	4.80787
103130829	-6.64386	4.57652	4.72119	5.00944	-6.64386	3.05918	3.58416	3.76129	-6.64386	4.15462	4.09887	4.48768
103130393	-6.64386	5.1981	3.34719	3.84398	-6.64386	3.74792	2.59534	3.0835	-6.64386	6.40403	4.34412	4.60496
103129408	-6.64386	4.73525	3.37295	3.70524	-6.64386	3.69877	3.13367	3.5373	-6.64386	6.23668	5.16832	4.89166
103143439	-6.64386	5.64342	3.55582	3.77012	-6.64386	4.98003	3.85067	3.76836	-6.64386	5.16229	3.8212	3.61294
103143455	-6.64386	5.87246	4.69079	4.84097	-6.64386	4.04745	3.31615	3.48886	-6.64386	5.73633	3.63343	4.16068
103149752	1.29866	8.61125	6.83048	6.99466	1.41143	8.96581	8.1091	8.26574	-0.0218044	7.24968	6.78803	6.88673
103141681	-1.57777	8.96581	8.96581	8.96581	-2.25154	8.96581	8.96581	8.96581	-3.18442	8.96581	8.76333	8.7955
103134617	7.38746	8.18889	7.33652	7.31765	8.00806	8.80723	8.55034	8.56336	6.19643	6.92819	6.92671	6.99418
103130045	8.89954	7.46565	8.00979	7.96103	8.96581	8.34944	8.96581	8.96581	8.2911	6.98054	7.96151	8.01742
103152332	-0.971431	1.14405	4.53252	-0.427919	-0.444184	0.521051	3.43874	-2.25154	6.76765	8.04431	8.35143	6.75569
103142973	-0.836501	3.75328	1.99156	2.555	3.12681	6.91301	6.31246	6.51454	4.83592	8.53444	7.63597	7.47338
103138378	3.58015	4.08619	2.52189	4.52836	2.08236	2.14893	1.37481	3.95822	5.30688	5.626	2.7137	6.04571
103140983	6.89282	4.6314	4.45242	4.37805	3.51223	0.521051	1.03092	1.17632	1.68257	5.37799	5.77834	5.28207
103155965	4.0009	1.17632	2.39963	2.66903	5.70556	2.75702	4.95621	5.05933	4.6372	1.78031	3.9644	3.59813
103154126	4.5598	1.42492	3.34955	3.42984	4.59902	1.6017	3.62761	3.75596	6.52842	2.25096	5.57471	5.47525
103135895	3.94813	1.91073	3.45856	3.79286	4.04745	1.88166	4.28244	4.16269	5.96081	3.42425	5.09845	4.93711
103130097	4.5598	1.50335	3.92378	3.54143	4.18269	1.22342	3.0048	2.42223	4.19061	1.19219	3.46728	2.90881
103141662	5.46467	3.24565	4.63479	4.38151	3.38681	1.12763	1.54102	1.49057	4.93829	3.79546	4.33163	4.14853
103133584	4.22188	1.02503	3.42761	2.89595	2.89433	-0.0588937	2.80254	1.69004	5.59723	2.5509	4.97888	4.31904
103130915	5.38059	2.12433	4.68613	4.22188	3.0197	-0.176251	1.96717	1.49057	5.77965	2.08236	5.09001	4.73118
103133852	7.16148	4.05181	5.98208	5.74936	5.33038	2.0993	3.30402	2.99277	5.00158	2.01257	4.12391	4.10308
103135693	7.0258	4.62994	6.21548	6.55167	4.39815	2.29572	3.22136	3.05774	6.12122	3.61294	5.47606	5.30415
103130785	4.98459	2.4019	3.85898	5.27215	3.72629	1.02503	2.27103	3.02857	7.46299	4.66164	6.52646	6.18359
103146427	5.16631	1.89142	4.54803	4.5158	3.58616	-0.136062	3.06062	3.25197	6.42517	3.23419	5.73091	5.7849
103155985	5.34376	1.07724	4.46554	5.99872	3.93876	-0.0218044	2.83323	4.51054	6.24859	2.20477	5.31415	6.36387
103155911	7.32989	2.40871	6.34032	6.11638	5.30323	0.15056	4.87004	4.89288	8.16634	2.87971	7.10129	6.98539
103153473	6.11551	1.42492	5.10476	5.17964	5.21859	0.304511	4.00839	4.17606	5.71795	0.794936	4.77795	5.03496
103141046	6.06846	2.86987	4.78363	4.55008	5.01167	1.92979	4.3453	4.13148	5.93981	2.56925	5.10161	4.804
103152856	6.72601	6.61927	7.53042	3.75951	4.72846	4.81044	5.62527	2.31034	6.38301	6.64364	7.2447	3.83137
103142503	5.58901	5.32859	6.40389	3.13093	4.21218	4.0321	5.1643	1.92347	5.37626	5.2502	6.08076	2.7301
103130802	6.10769	6.00416	6.87909	2.57934	4.80916	4.7845	6.50557	2.0036	5.53714	5.41058	6.48075	2.03034
103150175	4.95117	4.66874	6.11638	0.98307	2.31759	2.32481	3.93168	-1.54232	6.08183	6.35156	7.18671	1.89142
103150174	4.91337	4.6401	5.61843	0.701919	3.49953	3.46401	4.6777	0.234706	5.50176	5.29407	6.34359	2.31759
103140154	3.80064	4.374	4.73841	2.17313	2.7301	3.12681	3.2393	0.461179	3.42761	3.1914	4.27873	1.65992
103146416	4.81429	5.20398	5.10894	1.69748	4.36001	4.65163	4.63575	1.77681	4.70515	5.09318	5.70349	-0.217591
103136823	4.57652	4.54751	4.65878	2.95915	3.88362	4.29168	3.88362	1.61353	5.84134	5.78555	5.53792	0.469886
103147544	5.14608	5.04483	4.30694	5.54772	4.16068	4.0648	3.91902	4.97085	7.62669	7.5758	6.80361	8.14509
103129360	5.85636	5.74645	6.58386	4.86921	5.96197	5.86876	7.34424	5.45319	6.17862	6.08979	6.68243	5.39951
103154763	5.35702	6.57418	5.68958	5.49164	3.6792	5.0492	4.94922	4.8766	5.53403	7.28179	6.28281	6.10455
103154986	6.56544	7.51952	7.57347	6.39392	4.35826	5.40122	5.0492	3.78241	5.9689	7.05783	7.15163	5.75315
103145074	5.11103	6.24479	5.45264	5.58926	3.95977	5.04811	4.53978	4.43696	3.38336	4.65306	4.17073	4.46336
103137641	2.59932	4.34767	3.60011	3.4651	3.30889	5.06652	3.59614	3.38681	2.36737	4.14241	4.02104	3.59216
103130892	3.01525	4.6744	3.85566	3.70524	3.43095	5.23016	4.393	4.51159	2.68594	4.65878	4.0798	3.74792
103140795	2.25852	4.42861	3.35426	3.5269	3.53419	5.57698	5.80847	5.58225	3.86146	5.64775	5.02392	5.1471
103142317	2.26604	4.59305	3.23675	3.83559	5.00158	6.39977	5.40065	5.287	3.57107	5.81532	4.76208	4.95582
103147725	1.50335	5.98208	4.7958	4.79494	2.03034	6.02481	5.18362	5.08647	2.15704	5.93805	5.22342	4.88557
103151135	1.91073	6.16762	5.31988	5.287	0.687061	4.58105	3.87381	3.76483	1.84197	6.10507	4.90977	5.28577
103155217	2.11603	5.81404	4.89449	4.85931	0.989139	4.82833	4.11908	4.25374	2.37434	6.20477	5.59051	5.25115
103153448	3.30889	6.1811	5.47876	5.17166	0.709291	3.55582	2.88947	2.41323	3.78241	6.83143	6.56354	5.95152
103131394	2.81967	6.38388	5.17699	5.39094	1.20789	4.60644	3.84231	3.86229	3.58316	6.94028	5.49057	5.9404
103145425	3.34483	5.58225	4.94922	5.08009	2.33199	4.83592	4.51475	4.55418	4.71891	7.10077	6.26697	6.36431
103143467	2.38819	6.02868	5.1889	5.02798	1.71589	5.13072	4.71388	4.09677	4.0798	7.45315	6.46695	6.46491
103131393	2.78346	6.1811	4.83761	4.71388	1.91073	5.38578	4.44361	4.69358	3.6792	7.3999	6.65191	6.43563
