# Supplementary material for: Fixation of allelic gene expression landscapes and expression bias pattern shape the transcriptome of the clonal Amazon molly
Source: HighWire-hosted journal article supplement (doi:10.1101/gr.268870.120), 2021-02-05
Supplement: Supplemental_Table_S10.xlsx [file Supplemental_Table_S10.xlsx]

## Sheet: all
Supplemental Table S10. Allelic expression pattern comparison between two P. formosa clones
	summary:brain
	gene counts	percentage
clone 1 consistent	19118	0.905251
clone 1 incosistent	2001	0.0947488
clone 2 consistent	18361	0.869407
clone 2 inconsistent	2758	0.130593
clone1.no.bias_clone2.no.bias	15843	0.750178
clone1.no.bias_clone2.bias	234	0.0110801
clone1.no.bias_clone2.inconsistent	1148	0.0543586
clone1.bias_clone2.no.bias	155	0.00733936
clone1.bias_clone2.bias_reversed	42	0.00198873
clone1.bias_clone2.bias_same	1296	0.0613665
clone1.biased_clone2.inconsistent	400	0.0189403
clone1.inconsistent_clone2.no.bias	653	0.03092
clone1.inconsistent_clone2.bias	138	0.0065344
clone1.inconsistent_clone2.inconsistent	1210	0.0572944
sum	21119	1
