# Supplementary material for: Fixation of allelic gene expression landscapes and expression bias pattern shape the transcriptome of the clonal Amazon molly
Source: HighWire-hosted journal article supplement (doi:10.1101/gr.268870.120), 2021-02-05
Supplement: Supplemental_Table_S11.xlsx [file Supplemental_Table_S11.xlsx]

## Sheet: Sheet1
Supplemental Table S11. Signaling pathways enriched by genes exhibiting different allelic expression pattern between P. formosa and interspecies hybrids
Brain
Ingenuity.Canonical.Pathways	"-1Log(p.value)"	Molecules	qua
Regulation of eIF4 and p70S6K Signaling	3.42	AGO1,AGO4,EIF2B1,EIF2S3,EIF3E,EIF4E,MAP2K1,PIK3R4,PPP2R2C,RPS10,RPS18,RPS9	yeah,total,11,clonal.bias,9,f1.bias,0
EIF2 Signaling	3.14	AGO1,AGO4,EIF2B1,EIF2S3,EIF3E,EIF4E,MAP2K1,PIK3R4,RPL15,RPL22L1,RPS10,RPS18,RPS9,SREBF1	yeah,total,13,clonal.bias,11,f1.bias,0
PI3K/AKT Signaling	3.13	EIF4E,GSK3A,HSP90B1,MAP2K1,MAPK8IP1,NFKB1,PPP2R2C,YWHAB,YWHAG,YWHAQ	yeah,total,10,clonal.bias,10,f1.bias,0
Sirtuin Signaling Pathway	3.06	ADAM10,APEX1,CPT1A,GABARAPL2,IDH2,MAP1LC3A,NDUFB10,NFKB1,NR1H3,RARB,SLC25A6,SLC2A1,SREBF1,TOMM40,VDAC2,XPC	yeah,total,16,clonal.bias,15,f1.bias,1
Unfolded protein response	2.84	CANX,CEBPA,CEBPG,HSP90B1,HSPA8,SREBF1	yeah,total,6,clonal.bias,6,f1.bias,0
Protein Ubiquitination Pathway	2.51	BAG1,DNAJC15,DNAJC27,HSP90B1,HSPA8,PSMB2,PSMD13,TRAF6,UBE2D4,UBE2E1,UBE2K,UBE2V1,UBE2V2,USP22	yeah,total,14,clonal.bias,14,f1.bias,0
Protein Kinase A Signaling	2.42	APEX1,EYA3,GNAI2,GSK3A,LIPE,MAP2K1,MYL9,NFATC1,NFKB1,PDE10A,PHKB,PRKCA,PTK2B,PTPRU,SMPDL3A,YWHAB,YWHAG,YWHAQ	yeah,total,18,clonal.bias,17,f1.bias,0
Signaling by Rho Family GTPases	2.27	ARHGEF7,ARPC1A,CDH18,GNAI2,GNAO1,IQGAP1,MAP2K1,MYL9,NFKB1,PIK3R4,PTK2B,SEPT7,SLC9A1	yeah,total,13,clonal.bias,13,f1.bias,0
Hypoxia Signaling in the Cardiovascular System	2.22	HSP90B1,UBE2D4,UBE2E1,UBE2K,UBE2V1,UBE2V2	yeah,total,6,clonal.bias,6,f1.bias,0
Rac Signaling	2.13	ARPC1A,CDK5R1,IQGAP1,IQGAP2,MAP2K1,NFKB1,PIK3R4,PTK2B	yeah,total,10,clonal.bias,10,f1.bias,0
Superpathway of Serine and Glycine Biosynthesis I	2.02	PSAT1,SHMT2	yeah,total,2,clonal.bias,2,f1.bias,0
Liver
Coagulation System	4.09	A2M,F10,F5,F9,PROC	no,total,6,clonal.bias,2,f1.bias,2
Cysteine Biosynthesis/Homocysteine Degradation	3.78	CBS/CBSL,CTH	none
Regulation of eIF4 and p70S6K Signaling	3.46	AGO4,EIF2S3,EIF3E,EIF4A2,EIF4E,PIK3CB,PIK3R4,RPS10,RPS18	yeah,total,9,clonal.bias,8,f1.bias,0
EIF2 Signaling	3.04	AGO4,EIF2S3,EIF3E,EIF4A2,EIF4E,PIK3CB,PIK3R4,RPL15,RPS10,RPS18	yeah,total,10,clonal.bias,9,f1.bias,0
Extrinsic Prothrombin Activation Pathway	2.98	F10,F5,PROC	no,total,4,clonal.bias,2,f1.bias,1
Superpathway of Methionine Degradation	2.89	CBS/CBSL,CTH,GOT2,MAT1A	no,total,3,clonal.bias,1,f1.bias,1
Intrinsic Prothrombin Activation Pathway	2.69	F10,F5,F9,PROC	no,total,5,clonal.bias,2,f1.bias,2
Cysteine Biosynthesis III (mammalia)	2.45	CBS/CBSL,CTH,MAT1A	no,total,2,clonal.bias,1,f1.bias,1
Histidine Degradation III	2.36	AMDHD1,FTCD	no,total,2,clonal.bias,0,f1.bias,1
Estrogen-Dependent Breast Cancer Signaling	2.21	HSD17B10,HSD17B12,NFKB1,PIK3CB,PIK3R4	yeah,total,5,clonal.bias,4,f1.bias,0
mTOR Signaling	2.09	EIF3E,EIF4A2,EIF4E,PIK3CB,PIK3R4,RHOU,RPS10,RPS18	yeah,total,8,clonal.bias,8,f1.bias,0
Ovary
Molecular Mechanisms of Cancer	3.71	APH1A,BIRC2,BMP2,BMP8A,BMPR2,CDC25B,CDK13,CDK2,CDK4,CRK,E2F8,FZD7,GNAI2,GSK3A,KRAS,MAP2K2,NFKB1,PIK3C2A,PIK3R4,PLCB1,PRKAG1,RAP2A,RHOU,RHOV,SMO,TYK2,WNT5B	no,total,27,clonal.bias,18,f1.bias,9
Role of NANOG in Mammalian Embryonic Stem Cell Pluripotency	3.53	BMP2,BMP8A,BMPR2,FZD7,KRAS,MAP2K2,PIK3C2A,PIK3R4,RAP2A,SMO,TBXT,TYK2,WNT5B	no,total,13,clonal.bias,7,f1.bias,6
Glioblastoma Multiforme Signaling	3.23	CDK2,CDK4,E2F8,FZD7,KRAS,MAP2K2,PIK3C2A,PIK3R4,PLCB1,PLCH2,RAP2A,RHOU,RHOV,SMO,WNT5B	no,total,15,clonal.bias,8,f1.bias,7
Rac Signaling	3.17	ARFIP2,IQGAP1,IQGAP2,KRAS,LIMK2,MAP2K2,NFKB1,PARD6A,PIK3C2A,PIK3R4,PIP5K1C,RAP2A	no,total,13,clonal.bias,9,f1.bias,3
Protein Ubiquitination Pathway	3	ANAPC10,BIRC2,DNAJB4,DNAJC15,DNAJC2,HSP90B1,PSMB2,PSMB3,PSMC5,PSMD13,SMO,TAP1,TRAF6,UBE2K,UBE2T,UBE2V1,UBE2V2,USP22,USP38	yeah,total,19,clonal.bias,16,f1.bias,3
Cell Cycle Control of Chromosomal Replication	2.74	CDK13,CDK2,CDK4,MCM3,POLA1,TOP2A,TOP2B	no,total,7,clonal.bias,4,f1.bias,3
Integrin Signaling	2.6	CAPN2,CRK,CTTN,DOCK1,ITGA1,ITGA7,KRAS,MAP2K2,MPRIP,NEDD9,PIK3C2A,PIK3R4,RAP2A,RHOU,RHOV,TTN	yeah,total,17,clonal.bias,13,f1.bias,4
Axonal Guidance Signaling	2.59	ABLIM1,ADAM10,ADAM12,BMP2,BMP8A,BRCC3,CRK,DOCK1,FZD7,GLIS1,GNAI2,KLC1,KRAS,LIMK2,MAP2K2,NFATC4,PIK3C2A,PIK3R4,PLCB1,PLCH2,PRKAG1,RAP2A,SDC2,SEMA4C,SHANK2,SMO,TUBB4B,WNT5B	no,total,28,clonal.bias,20,f1.bias,6
Regulation of eIF4 and p70S6K Signaling	2.59	AGO4,EIF2B1,EIF3E,EIF4G2,KRAS,MAP2K2,PABPC1,PIK3C2A,PIK3R4,RAP2A,RPS10,RPS18,RPS9	no,total,12,clonal.bias,7,f1.bias,3
EIF2 Signaling	2.54	AGO4,EIF2B1,EIF3E,EIF4G2,KRAS,MAP2K2,MYCN,PABPC1,PIK3C2A,PIK3R4,RAP2A,RPL15,RPL22L1,RPS10,RPS18,RPS9	no,total,15,clonal.bias,10,f1.bias,3
Actin Cytoskeleton Signaling	2.5	CRK,DOCK1,FLNA,IQGAP1,IQGAP2,KRAS,LIMK2,MAP2K2,MPRIP,MSN,PIK3C2A,PIK3R4,PIP5K1C,RAP2A,SLC9A1,TTN	yeah,total,18,clonal.bias,14,f1.bias,3
Wnt/Ca+ pathway	2.49	FZD7,NFATC4,NFKB1,PLCB1,PLCH2,SMO,WNT5B	no,total,7,clonal.bias,4,f1.bias,3
Adipogenesis pathway	2.46	ATG7,BMP2,BMPR2,DGKD,FGFRL1,FZD7,NFATC4,PPIP5K1,SAP18,SMO,TBL1XR1	no,total,11,clonal.bias,8,f1.bias,3
Aldosterone Signaling in Epithelial Cells	2.45	DNAJB4,DNAJC15,DNAJC2,HSP90B1,KRAS,MAP2K2,PIK3C2A,PIK3R4,PIP5K1C,PLCB1,PLCH2,SLC9A1,SMO	no,total,13,clonal.bias,9,f1.bias,4
Mouse Embryonic Stem Cell Pluripotency	2.41	BMPR2,FZD7,KRAS,MAP2K2,PIK3C2A,PIK3R4,RAP2A,SMO,TBXT,TYK2	no,total,10,clonal.bias,4,f1.bias,6
Regulation of the Epithelial-Mesenchymal Transition Pathway	2.33	APH1A,FGFRL1,FZD7,KRAS,MAML1,MAP2K2,NFKB1,PARD6A,PIK3C2A,PIK3R4,RAP2A,SMO,TYK2,WNT5B	no,total,14,clonal.bias,9,f1.bias,5
BMP signaling pathway	2.28	BMP2,BMP8A,BMPR2,KRAS,MAP2K2,NFKB1,PRKAG1,RAP2A	no,total,8,clonal.bias,5,f1.bias,3
RhoA Signaling	2.26	ANLN,KTN1,LIMK2,MPRIP,MSN,PIP5K1C,PLEKHG5,RTKN,SEPT7,TTN	yeah,total,10,clonal.bias,10,f1.bias,0
Signaling by Rho Family GTPases	2.09	ARFIP2,CDH15,GNAI2,IQGAP1,LIMK2,MAP2K2,MSN,NFKB1,PARD6A,PIK3C2A,PIK3R4,PIP5K1C,RHOU,RHOV,SEPT7,SLC9A1	yeah,total,16,clonal.bias,12,f1.bias,3
